# Supplementary material for: Lactols in an asymmetric aldol-desymmetrization sequence: access to tetrahydro-4H-furo[2,3-b]pyran-2-one and tetrahydro-4H-furo[2,3-b]furan-2-one derivatives
Source: Royal Society of Chemistry journal article supplement (doi:10.1039/c6ob02420c), 2017-01-01

**Lactol in Asymmetric Aldol-Desymmetrization Sequence:  
Access to Tetrahydro-4*H*-furo[2,3-*b*]pyran-2-one and  
Tetrahydro-4*H*-furo[2,3-*b*]furan-2-one Derivatives**

Ji-Yao Li,<sup>†</sup> Ke-Wei Yu,<sup>‡</sup> Chao-Chao Xie,<sup>†</sup> Yan-Kai Liu<sup>\*,†</sup>

<sup>†</sup>Key Laboratory of Marine Drugs, Chinese Ministry of Education, School of Medicine and Pharmacy, Ocean University of China, and Laboratory for Marine Drugs and Bioproducts of Qingdao National Laboratory for Marine Science and Technology, Qingdao 266003, People's Republic of China

<sup>‡</sup>Jinan Central Hospital Affiliated to Shandong University, Jinan 250013, People's Republic of China

**Supporting Information**

## Table of contents

|                                                                                          |    |
|------------------------------------------------------------------------------------------|----|
| 1. Optimization of the Reaction Condition.....                                           | 3  |
| 2. Details of Reaction Conditions Study .....                                            | 4  |
| 3. The Determination of the Absolute Configuration of Compound 5a/5'd/5h/5'h/5l<br>..... | 8  |
| 4. NMR spectra and PLC Traces.....                                                       | 13 |

# 1. Optimization of the Reaction Condition

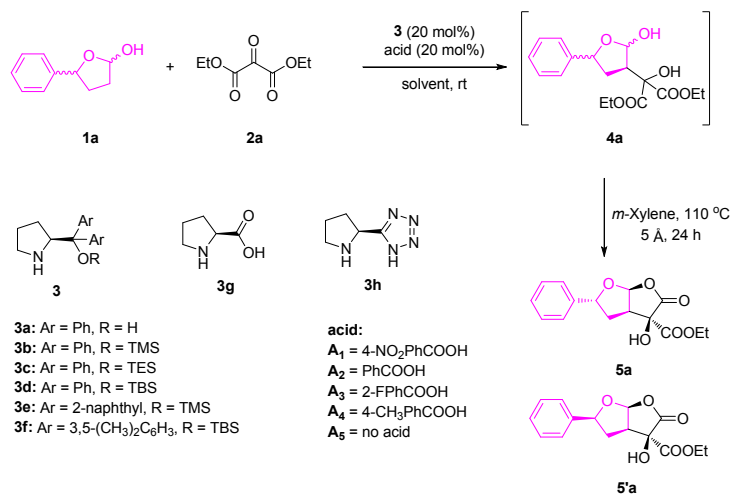

**Table 1**

| Entry           | Cat. | Acid           | Solvent                                           | Time <sup>b</sup> (h) | Yield <sup>c</sup> (%) |         | ee <sup>d</sup> (%) |          | dr <sup>e</sup> |
|-----------------|------|----------------|---------------------------------------------------|-----------------------|------------------------|---------|---------------------|----------|-----------------|
|                 |      |                |                                                   |                       | 5a/5'a                 | 5a/5'a  | 5a/5'a              | 5a/5'a   |                 |
| 1 <sup>f</sup>  | 3a   | A <sub>1</sub> | CH <sub>3</sub> CN                                | -                     | -                      | -       | -                   | -        |                 |
| 2               | 3b   | A <sub>1</sub> | CH <sub>3</sub> CN                                | 15                    | 31/33                  | >99/96  | -/-                 | -/-      |                 |
| 3               | 3c   | A <sub>1</sub> | CH <sub>3</sub> CN                                | 24                    | 30/32                  | 97/85   | -/-                 | -/-      |                 |
| 4               | 3d   | A <sub>1</sub> | CH <sub>3</sub> CN                                | 15                    | 30/32                  | 91/84   | -/-                 | -/-      |                 |
| 5               | 3e   | A <sub>1</sub> | CH <sub>3</sub> CN                                | 15                    | 27/29                  | 98/96   | -/-                 | -/-      |                 |
| 6               | 3f   | A <sub>1</sub> | CH <sub>3</sub> CN                                | 15                    | 32/33                  | 94/78   | -/-                 | -/-      |                 |
| 7               | 3g   | A <sub>1</sub> | CH <sub>3</sub> CN                                | 48                    | 28/29                  | -93/-99 | -/-                 | -/-      |                 |
| 8               | 3h   | A <sub>1</sub> | CH <sub>3</sub> CN                                | >48                   | trace                  | -       | -                   | -/-      |                 |
| 9               | 3b   | A <sub>2</sub> | CH <sub>3</sub> CN                                | 28                    | 26/25                  | 97/96   | -/-                 | -/-      |                 |
| 10              | 3b   | A <sub>3</sub> | CH <sub>3</sub> CN                                | 24                    | 32/30                  | 98/96   | -/-                 | -/-      |                 |
| 11              | 3b   | A <sub>4</sub> | CH <sub>3</sub> CN                                | 36                    | 23/24                  | 96/98   | -/-                 | -/-      |                 |
| 12 <sup>g</sup> | 3b   | A <sub>5</sub> | CH <sub>3</sub> CN                                | -                     | -/-                    | -/-     | -/-                 | -/-      |                 |
| 13              | 3b   | A <sub>3</sub> | CH <sub>2</sub> Cl <sub>2</sub>                   | 10                    | 28/27                  | 96/95   | -                   | 2.7:1/-  |                 |
| 14              | 3b   | A <sub>3</sub> | toluene                                           | 8                     | 24/25                  | 98/99   | -                   | 1.0:1/-  |                 |
| 15              | 3b   | A <sub>3</sub> | THF                                               | 24                    | 29/28                  | >96/96  | -                   | 35.0:1/- |                 |
| 16 <sup>h</sup> | 3b   | A <sub>3</sub> | CH <sub>3</sub> CN/H <sub>2</sub> O               | 12                    | 31/32                  | >99/98  | -                   | 11.0:1/- |                 |
| 17 <sup>i</sup> | 3b   | A <sub>3</sub> | CH <sub>2</sub> Cl <sub>2</sub> /H <sub>2</sub> O | 12                    | 27/26                  | 98/95   | -                   | 2.5:1/-  |                 |

[a] Unless otherwise specified, all reactions were carried out using **1a** (0.36 mmol, 1.2 equiv), **2a** (0.3 mmol, 1.0 equiv) in solvent (0.6 mL) with **3** (20 mol%) and **acid** (20 mol%) at 25 °C. After workup, the mixture was concentrated and the residue was purified by flash chromatography on silica gel to afford **4a**. Then, *m*-Xylene (2.0 mL) and 5 Å (1.0 equiv) were added to the reaction at 110 °C for 24 hours. After full conversion of the second step, the residue was purified by flash chromatography on silica gel. [c] Yield of **5a** and **5'a**. [b] For the first step. [d/e] Determined by Chiral HPLC analysis. [f/g] No reaction. [h/i] 20% H<sub>2</sub>O was added. Entry in online marks optimized conditions.

## 2. Details of Reaction Conditions Study

**Table 2. Screening of catalysts<sup>a</sup>**

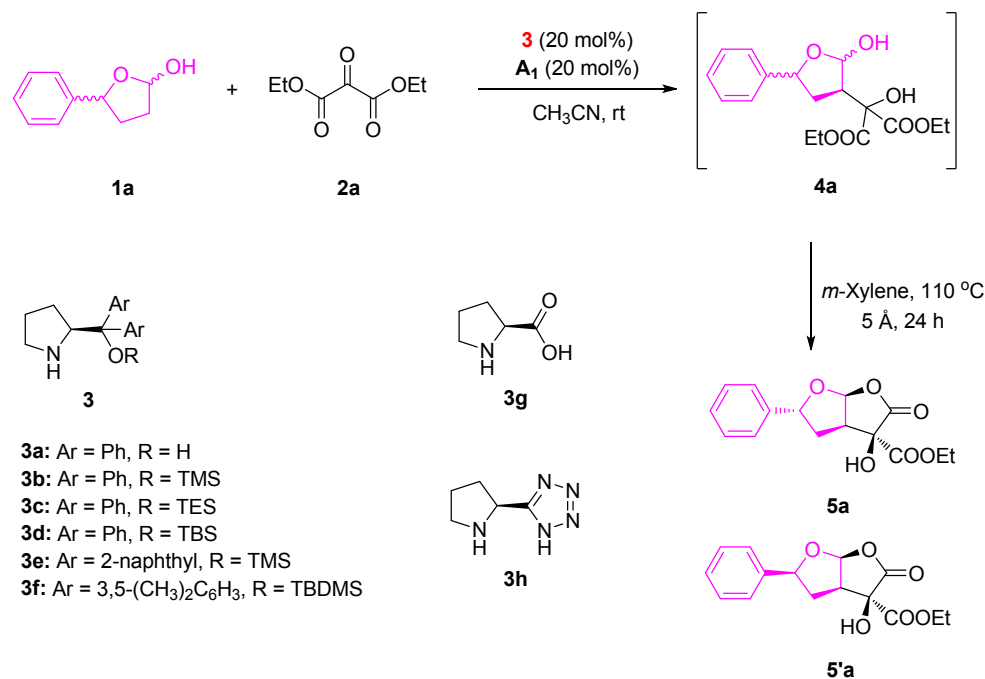

| Entry          | Cat. | Acid           | Solvent            | Time <sup>b</sup> (h) | Yield <sup>c</sup> (%) |         | ee <sup>d</sup> (%) |
|----------------|------|----------------|--------------------|-----------------------|------------------------|---------|---------------------|
|                |      |                |                    |                       | 5a/5'a                 | 5a/5'a  |                     |
| 1 <sup>e</sup> | 3a   | A <sub>1</sub> | CH <sub>3</sub> CN | -                     | -                      | -       | -/-                 |
| 2              | 3b   | A <sub>1</sub> | CH <sub>3</sub> CN | 15                    | 31/33                  | >99/96  |                     |
| 3              | 3c   | A <sub>1</sub> | CH <sub>3</sub> CN | 24                    | 30/32                  | 97/98   |                     |
| 4              | 3d   | A <sub>1</sub> | CH <sub>3</sub> CN | 15                    | 30/32                  | 91/84   |                     |
| 5              | 3e   | A <sub>1</sub> | CH <sub>3</sub> CN | 15                    | 27/29                  | 98/96   |                     |
| 6              | 3f   | A <sub>1</sub> | CH <sub>3</sub> CN | 15                    | 32/33                  | 94/78   |                     |
| 7              | 3g   | A <sub>1</sub> | CH <sub>3</sub> CN | 48                    | 28/29                  | -93/-99 |                     |
| 8              | 3h   | A <sub>1</sub> | CH <sub>3</sub> CN | >48                   | trace                  | -/-     |                     |

[a] Unless otherwise specified, all reactions were carried out using **1a** (0.36 mmol, 1.2 equiv), **2a** (0.3 mmol, 1.0 equiv) in solvent (0.6 mL) with **3** (20 mol%) and **A<sub>1</sub>** (20 mol%) at 25 °C. After workup, the mixture was concentrated and the residue was purified by flash chromatography on silica gel to afford **4a**. Then, *m*-xylene (2.0 mL) and 5 Å (1.0 equiv) were added to the reaction at 110 °C for 24 hours, after full conversion of the second step, the residue was purified by flash chromatography on silica gel. [b] For the first step. [c] Yield of **5a** and **5'a**, [d] Determined by Chiral HPLC analysis. [e] No reaction.

**Table 3. Screening of acids<sup>a</sup>**

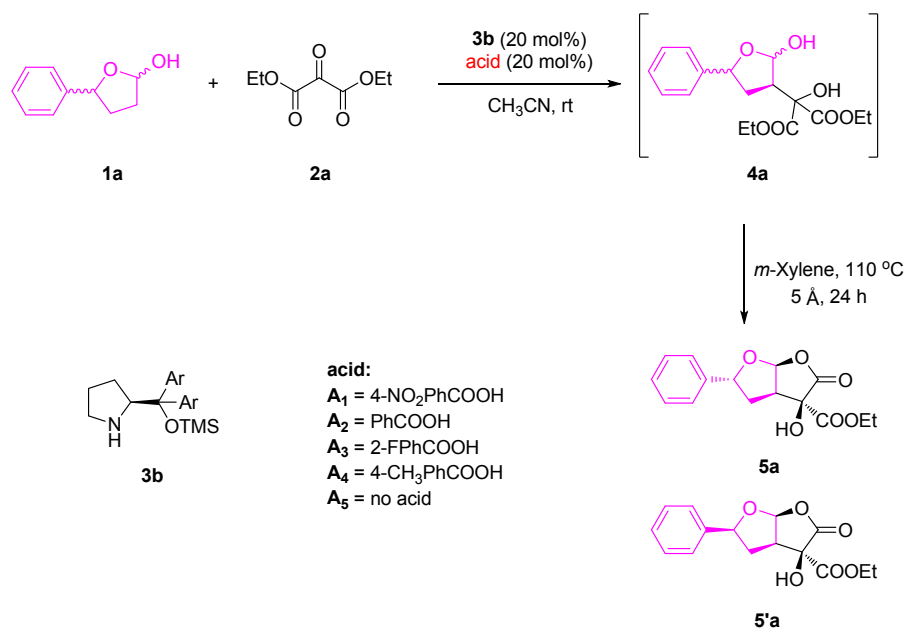

| Entry          | Cat. | Acid           | Solvent            | Time <sup>b</sup> (h) | Yield <sup>c</sup> (%) |        | ee <sup>d</sup> (%) |  |
|----------------|------|----------------|--------------------|-----------------------|------------------------|--------|---------------------|--|
|                |      |                |                    |                       | 5a/5'a                 |        | 5a/5'a              |  |
| 1              | 3b   | A <sub>1</sub> | CH <sub>3</sub> CN | 15                    | 31/33                  | >99/96 |                     |  |
| 2              | 3b   | A <sub>2</sub> | CH <sub>3</sub> CN | 28                    | 26/25                  | 97/96  |                     |  |
| 3              | 3b   | A <sub>3</sub> | CH <sub>3</sub> CN | 24                    | 32/30                  | 98/96  |                     |  |
| 4              | 3b   | A <sub>4</sub> | CH <sub>3</sub> CN | 36                    | 23/24                  | 96/98  |                     |  |
| 5 <sup>e</sup> | 3b   | A <sub>5</sub> | CH <sub>3</sub> CN | -                     | -/-                    | -/-    |                     |  |

[a] Unless otherwise specified, all reactions were carried out using **1a** (0.36 mmol, 1.2 equiv), **2a** (0.3 mmol, 1.0 equiv) in solvent (0.6 mL) with **3b** (20 mol%) and **acid** (20 mol%) at 25 °C. After workup, the mixture was concentrated and the residue was purified by flash chromatography on silica gel to afford **4a**. Then, *m*-Xylene (2.0 mL) and 5 Å (1.0 equiv) were added to the reaction at 110 °C for 24 hours, after full conversion of the second step, the residue was purified by flash chromatography on silica gel. [b] For the first step. [c] Yield of **5a** and **5'a**, [d] Determined by Chiral HPLC analysis. [e] No reaction.

**Table 4. Screening of solvents<sup>a</sup>**

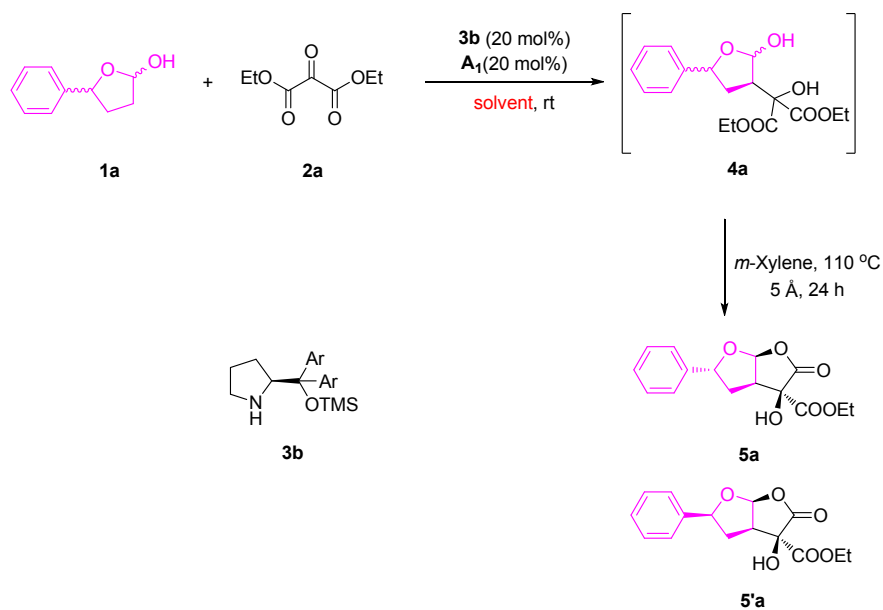

| Entry          | Cat. | Acid           | Solvent                                           | Time <sup>b</sup> (h) | Yield <sup>c</sup> (%) |        | ee <sup>d</sup> (%) |          | dr <sup>e</sup> |
|----------------|------|----------------|---------------------------------------------------|-----------------------|------------------------|--------|---------------------|----------|-----------------|
|                |      |                |                                                   |                       | 5a/5'a                 | 5a/5'a | 5a/5'a              | 5a/5'a   |                 |
| 1              | 3b   | A <sub>1</sub> | CH <sub>3</sub> CN                                | 15                    | 31/33                  | >99/96 |                     |          |                 |
| 2              | 3b   | A <sub>1</sub> | CH <sub>2</sub> Cl <sub>2</sub>                   | 10                    | 28/27                  | 96/95  |                     | 2.7:1/-  |                 |
| 3              | 3b   | A <sub>1</sub> | toluene                                           | 8                     | 24/25                  | 98/99  |                     | 1.0:1/-  |                 |
| 4              | 3b   | A <sub>1</sub> | THF                                               | 24                    | 29/28                  | >96/96 |                     | 35.0:1/- |                 |
| 5 <sup>f</sup> | 3b   | A <sub>1</sub> | CH <sub>3</sub> CN/H <sub>2</sub> O               | 12                    | 31/32                  | >99/98 |                     | 11.0:1/- |                 |
| 6 <sup>g</sup> | 3b   | A <sub>1</sub> | CH <sub>2</sub> Cl <sub>2</sub> /H <sub>2</sub> O | 12                    | 27/26                  | 98/95  |                     | 2.5:1/-  |                 |

[a] Unless otherwise specified, all reactions were carried out using **1a** (0.36 mmol, 1.2 equiv), **2a** (0.3 mmol, 1.0 equiv) in solvent (0.6 mL) with **3b** (20 mol%) and **A<sub>1</sub>** (20 mol%) at 25 °C. After workup, the mixture was concentrated and the residue was purified by flash chromatography on silica gel to afford **4a**. Then, *m*-xylene (2.0 mL) and 5 Å (1.0 equiv) were added to the reaction at 110 °C for 24 hours, after full conversion of the second step, the residue was purified by flash chromatography on silica gel. [b] For the first step. [c] Yield of **5a** and **5'a**. [d/e] Determined by Chiral HPLC analysis. [f/g] 20 % H<sub>2</sub>O was added.

**Table 5. Screening of second step**

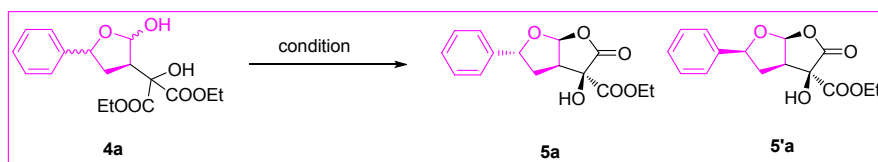

| Condition <sup>a</sup>                                  | Time <sup>b</sup> (h) | Yield <sup>c</sup> (%) | Ee <sup>d</sup> (%) |
|---------------------------------------------------------|-----------------------|------------------------|---------------------|
|                                                         |                       | 5a/5'a                 | 5a/5'a              |
| 3.0 eq PTSA, DCM, 20 °C                                 | 15                    | 25/12                  | 96/90               |
| 3.0 eq BF <sub>3</sub> ·Et <sub>2</sub> O, DCM, 0 °C    | 3                     | mess                   | -                   |
| 2.0 eq FeCl <sub>3</sub> ·6H <sub>2</sub> O, DCM, 25 °C | 5                     | mess                   | -                   |
| 6M HCl : CH <sub>3</sub> CN 1:1, 40 °C                  | 12                    | trace                  | 96/90               |
| 2.0 eq LiClO <sub>4</sub> , toluene, 40 °C              | >48                   | -                      | -                   |
| 2.0 eq LiClO <sub>4</sub> , toluene, 110 °C             | 4                     | mess                   | -                   |
| 0.2 eq PTSA, toluene, 110 °C                            | 4                     | mess                   | -                   |
| Toluene, 110 °C                                         | 24                    | 23/34                  | 99/96               |
| <i>m</i> -Xylene, 110 °C                                | 15                    | 25/33                  | 98/93               |
| <b><i>m</i>-Xylene, 5 Å, 110 °C</b>                     | <b>15</b>             | <b>31/33</b>           | <b>&gt;99/96</b>    |
| 1.2 eq DBU, THF, 25 °C                                  | 5                     | -                      | -                   |

[a] In solvent (1.0 mL) with **4a** (0.1 mmol). [b] For the second step. [c] Yield of **5a** and **5'a**. [d] Determined by Chiral HPLC analysis. DCM = dichloromethane; PTSA = *p*-toluenesulfonic acid; DBU = 1,8-Diazabicyclo[5.4.0]undec-7-ene.

### 3. The Determination of the Absolute Configuration of Compound 5a/5'd/5h/5'h/5l

#### Up Spot 5a:

The determination of the relative configuration of compound 5a by NOE

**H<sub>3</sub>: 6.36 ppm**

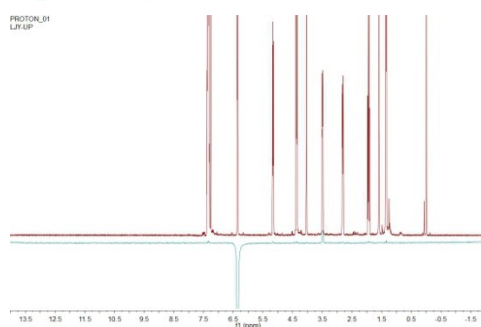

**H<sub>2</sub>: 5.16 ppm**

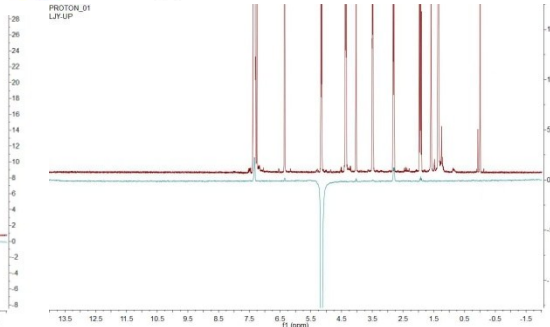

**H<sub>4</sub>: 4.36 ppm**

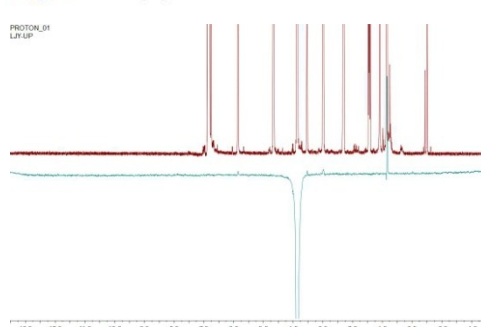

**H<sub>5</sub>: 3.49 ppm**

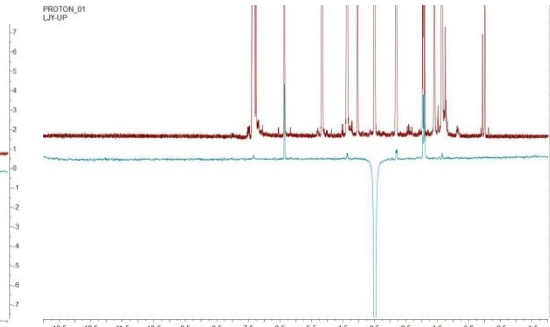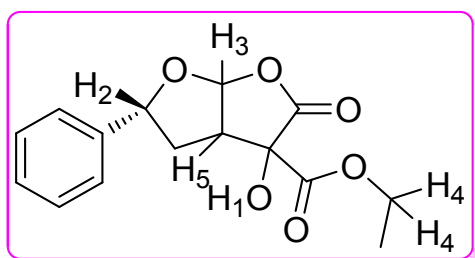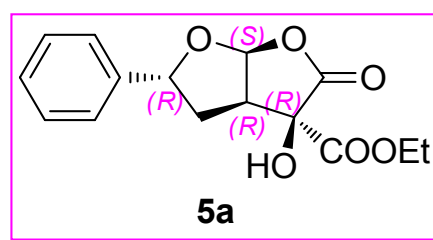



## Up Spot 5h:

### The determination of the relative configuration of compound 5h by NOE

**H<sub>3</sub>: 6.33 ppm**

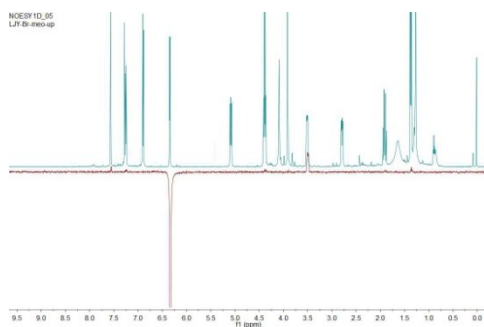

**H<sub>2</sub>: 5.07 ppm**

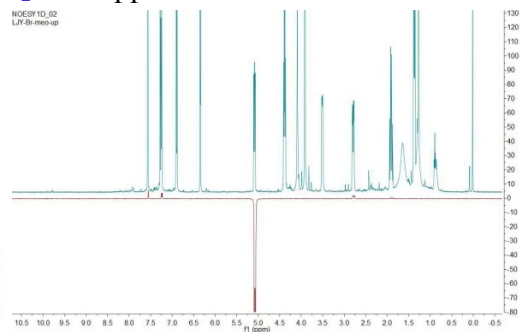

**H<sub>4</sub>: 4.37 ppm**

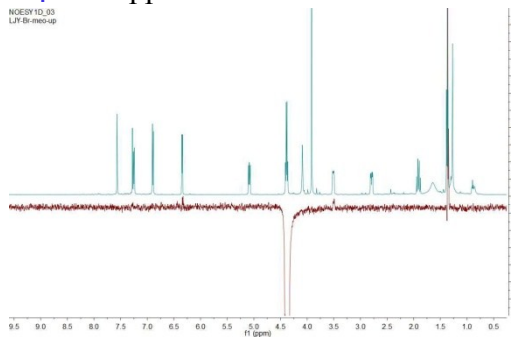

**H<sub>5</sub>: 3.50 ppm**

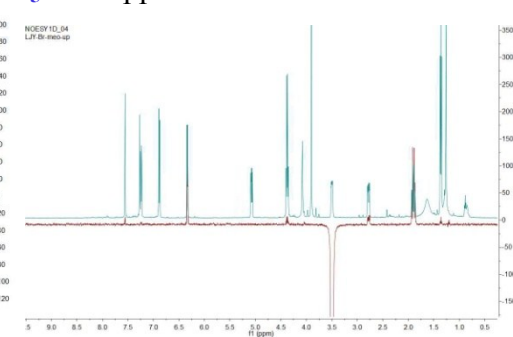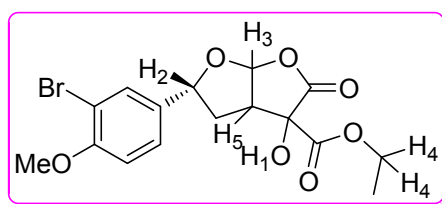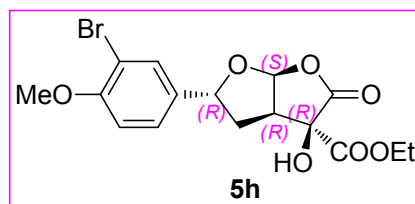

## Up Spot 51:

### The determination of the relative configuration of compound 51 by NOE

**H<sub>3</sub>: 6.30 ppm**

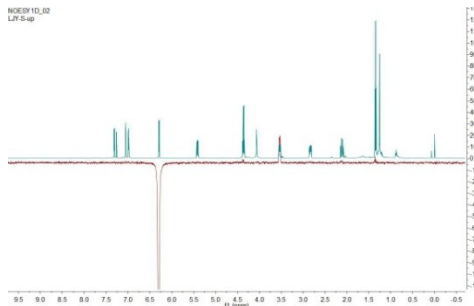

**H<sub>2</sub>: 5.42 ppm**

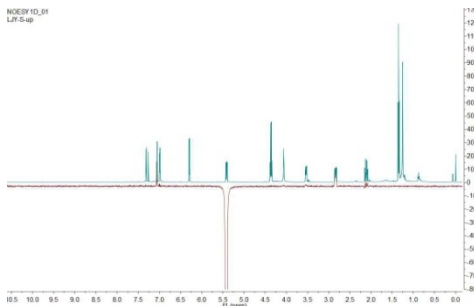

**H<sub>4</sub>: 4.37 ppm**

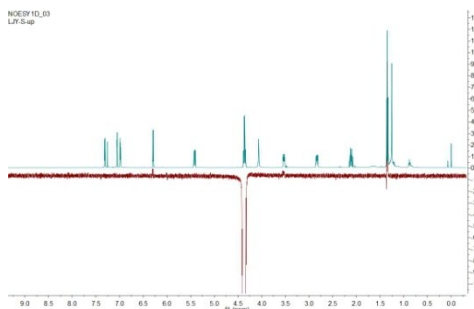

**H<sub>5</sub>: 3.50 ppm**

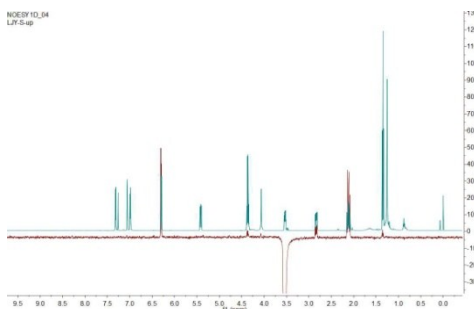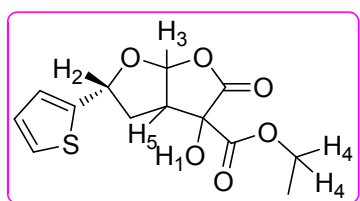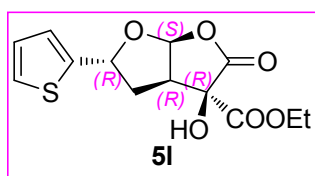

## Down Spot 5'h:

The determination of the absolute configuration of compound 5'h by Single Crystal X-Ray and NOE.

[CCDC 1510140 (5'h) contain the supplementary crystallographic data for this paper. These data can be obtained free of charge from The Cambridge Crystallographic Data Centre via [www.ccdc.cam.ac.uk/data\\_request/cif](http://www.ccdc.cam.ac.uk/data_request/cif).]

**H<sub>3</sub>**: 6.18 ppm

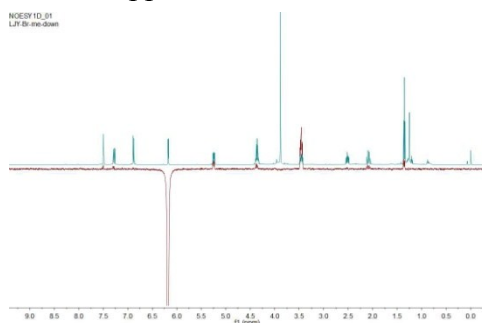

**H<sub>2</sub>**: 5.25 ppm

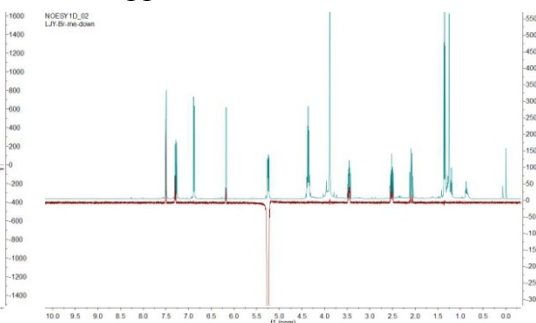

**H<sub>4</sub>**: 4.37 ppm

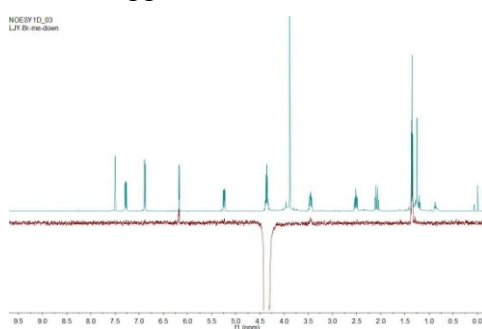

**H<sub>5</sub>**: 3.45 ppm

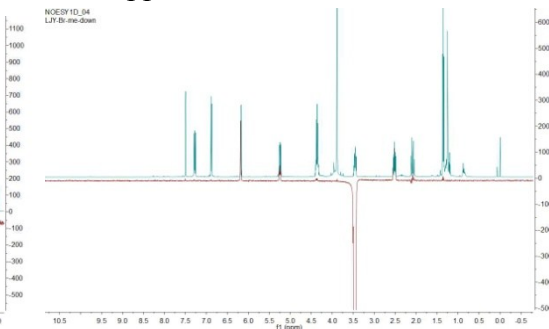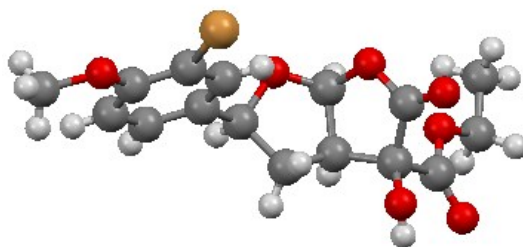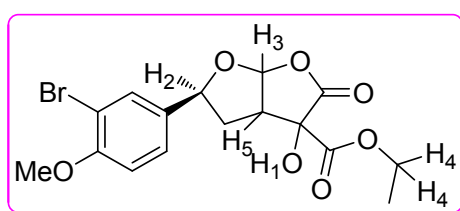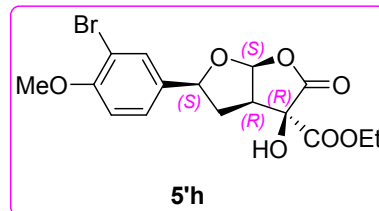

**Down Spot 5'd:**

**The determination of the relative configuration of compound 5'd by NOE**

**H<sub>3</sub>: 6.20 ppm**

**H<sub>2</sub>: 5.32 ppm**

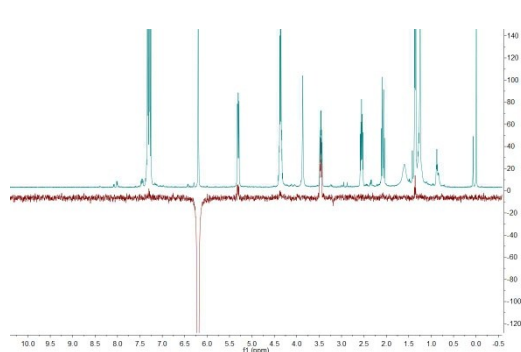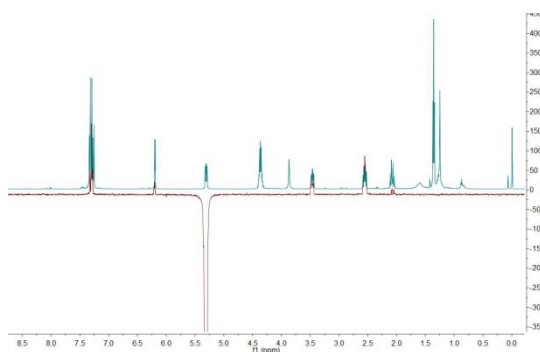

**H<sub>4</sub>: 4.37 ppm**

**H<sub>5</sub>: 3.47 ppm**

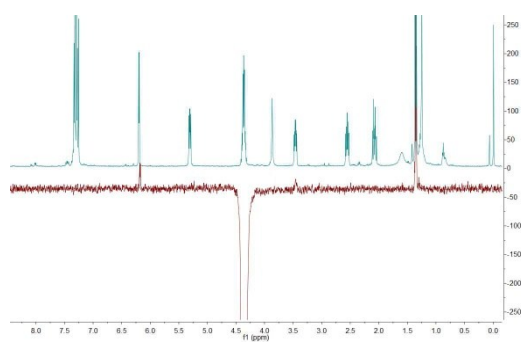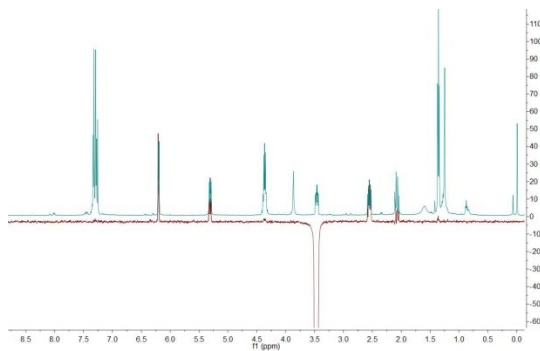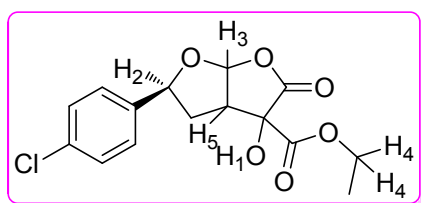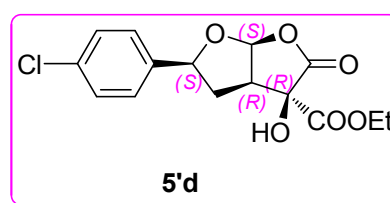

## 4. NMR spectra and HPLC Traces

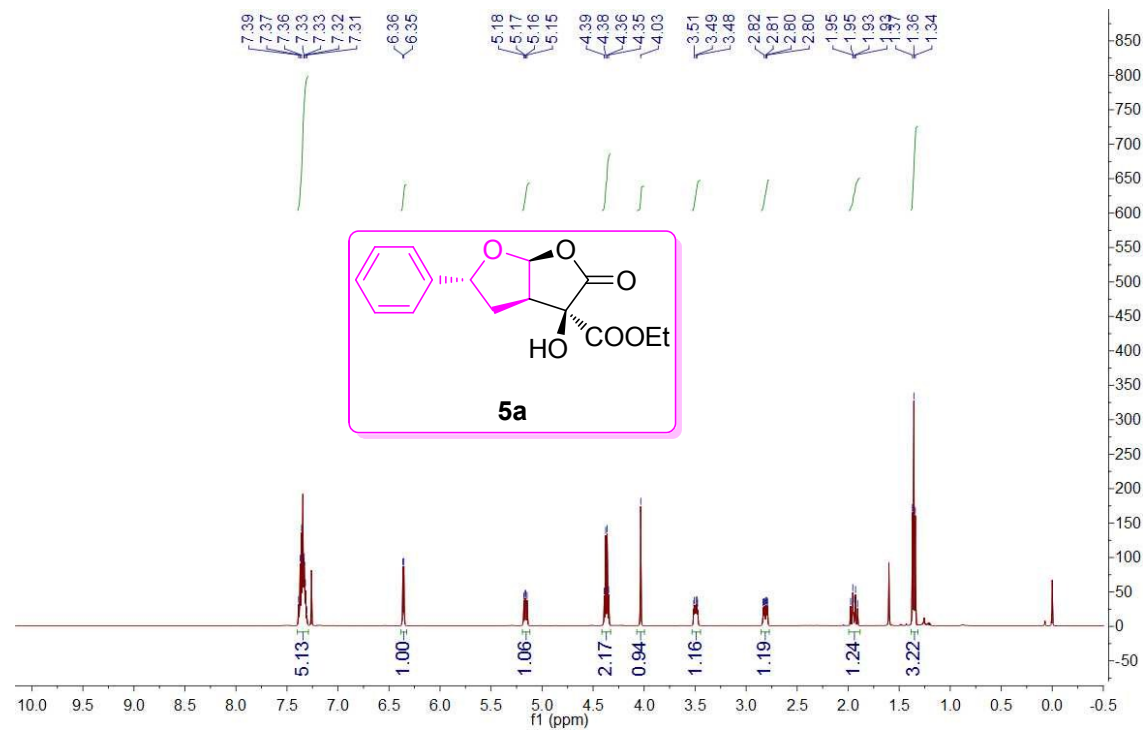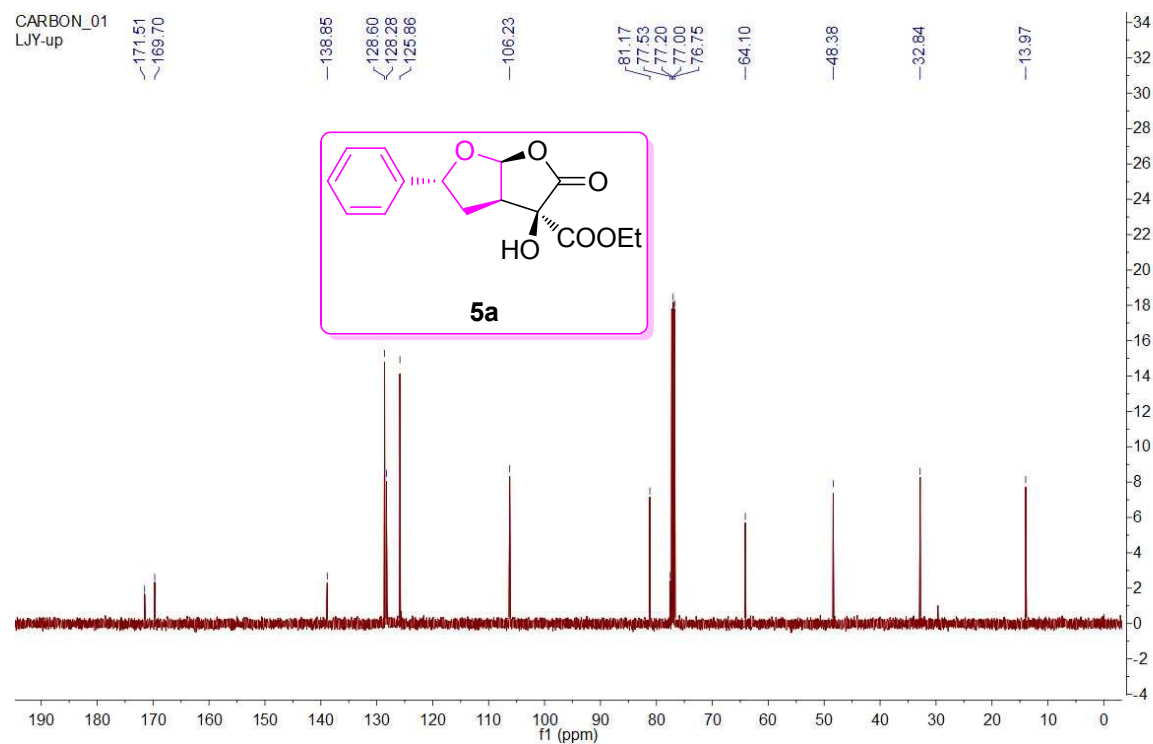

Chrom Type: Fixed WL Chromatogram, 210 nm

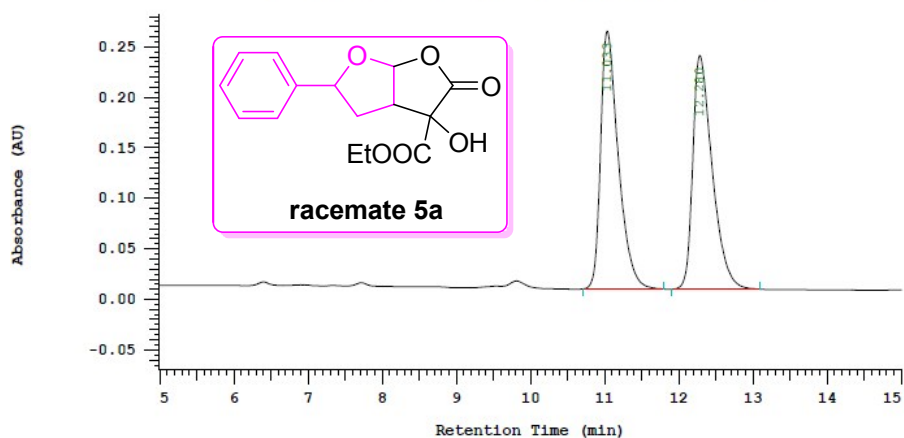

Chrom Type: Fixed WL Chromatogram, 210 nm

Peak Quantitation: AREA  
Calculation Method: AREA%

| No. | RT     | Area    | Area %  | BC |
|-----|--------|---------|---------|----|
| 1   | 11.033 | 2123832 | 50.116  | BB |
| 2   | 12.280 | 2113991 | 49.884  | BB |
|     |        | 4237823 | 100.000 |    |

Chrom Type: Fixed WL Chromatogram, 210 nm

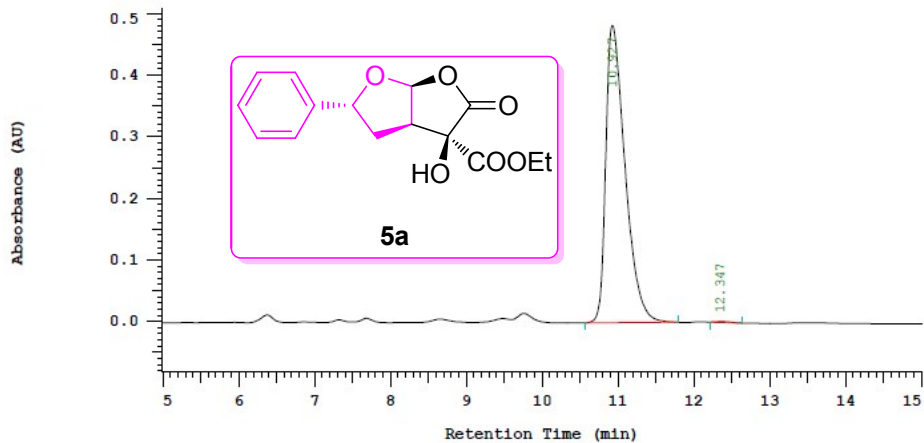

Chrom Type: Fixed WL Chromatogram, 210 nm

Peak Quantitation: AREA  
Calculation Method: AREA%

| No. | RT     | Area    | Area %  | BC |
|-----|--------|---------|---------|----|
| 1   | 10.927 | 4256415 | 99.751  | BB |
| 2   | 12.347 | 10615   | 0.249   | BB |
|     |        | 4267030 | 100.000 |    |

PROTON\_01  
LJR-MEW-3

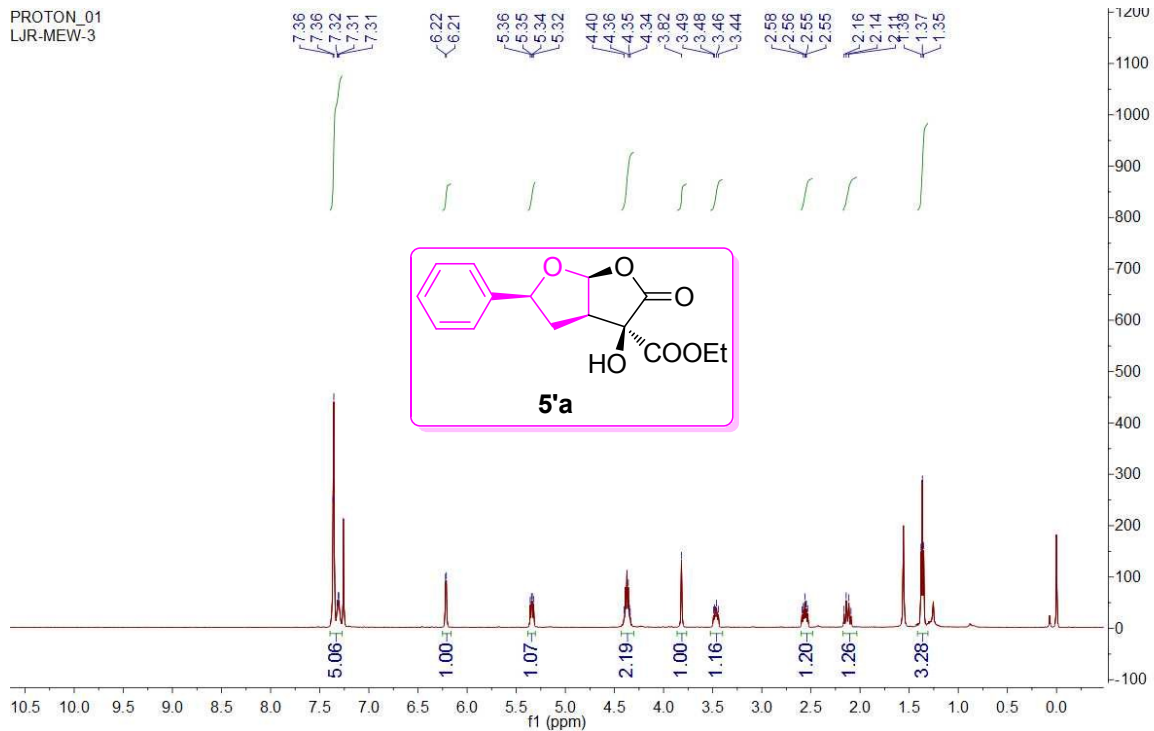

CARBON\_01  
LJY-down

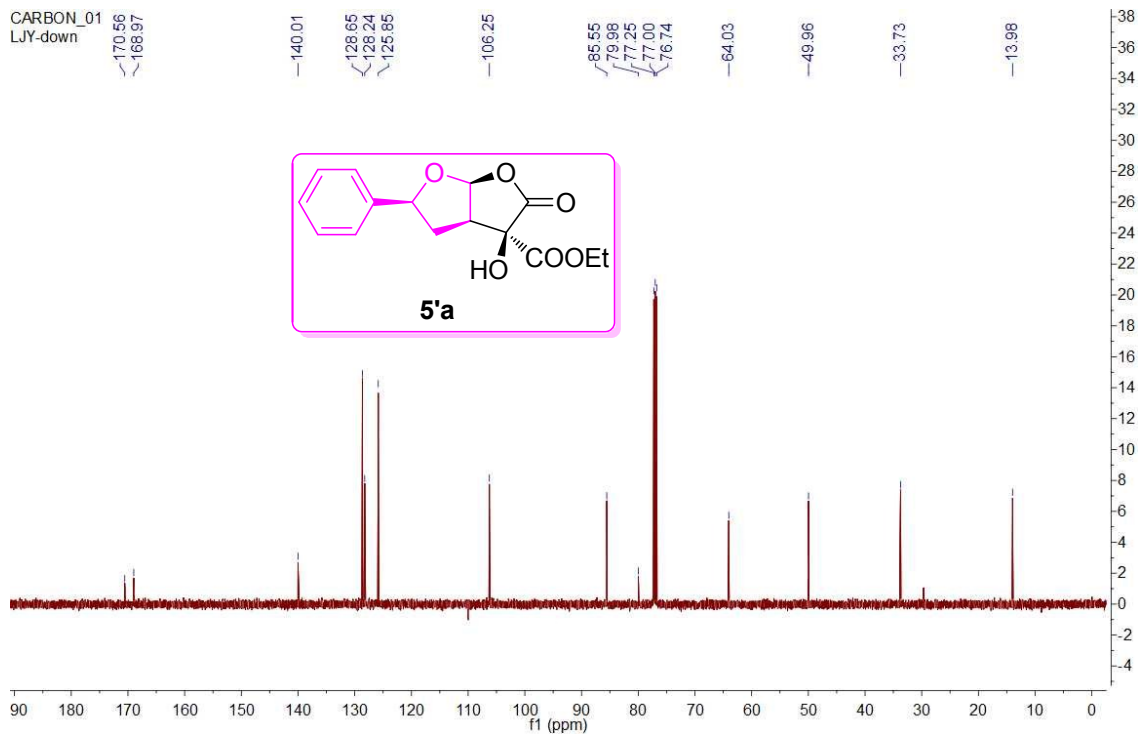

Chrom Type: Fixed WL Chromatogram, 210 nm

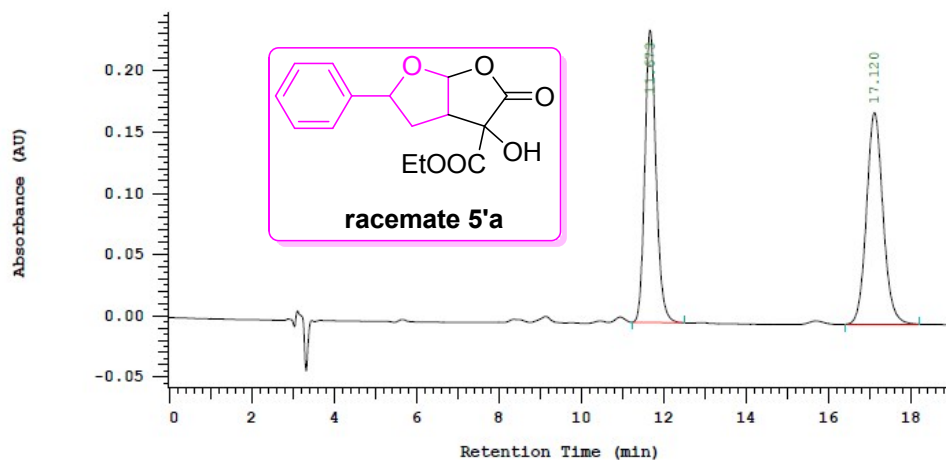

Chrom Type: Fixed WL Chromatogram, 210 nm

Peak Quantitation: AREA  
Calculation Method: AREA%

| No. | RT     | Area    | Area %  | BC |
|-----|--------|---------|---------|----|
| 1   | 11.673 | 2265143 | 48.415  | BB |
| 2   | 17.120 | 2413489 | 51.585  | BB |
|     |        | 4678632 | 100.000 |    |

Chrom Type: Fixed WL Chromatogram, 210 nm

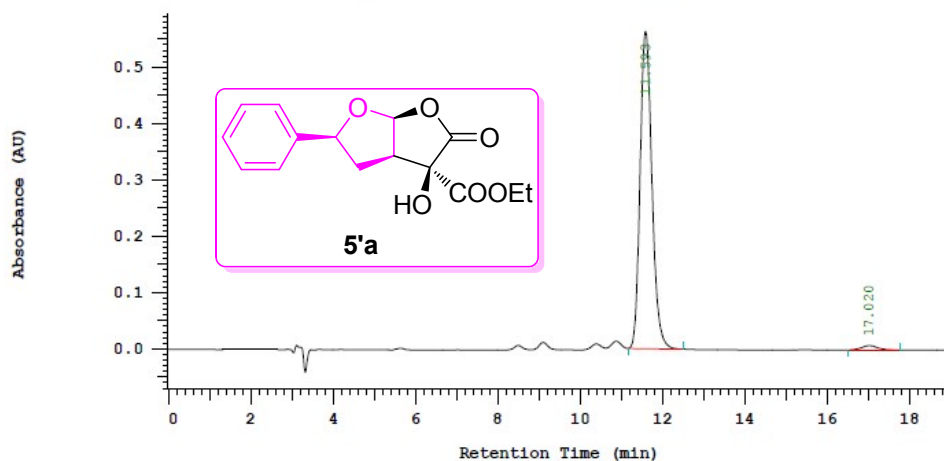

Chrom Type: Fixed WL Chromatogram, 210 nm

Peak Quantitation: AREA  
Calculation Method: AREA%

| No. | RT     | Area    | Area %  | BC |
|-----|--------|---------|---------|----|
| 1   | 11.593 | 5642263 | 98.202  | BB |
| 2   | 17.020 | 103327  | 1.798   | BB |
|     |        | 5745590 | 100.000 |    |



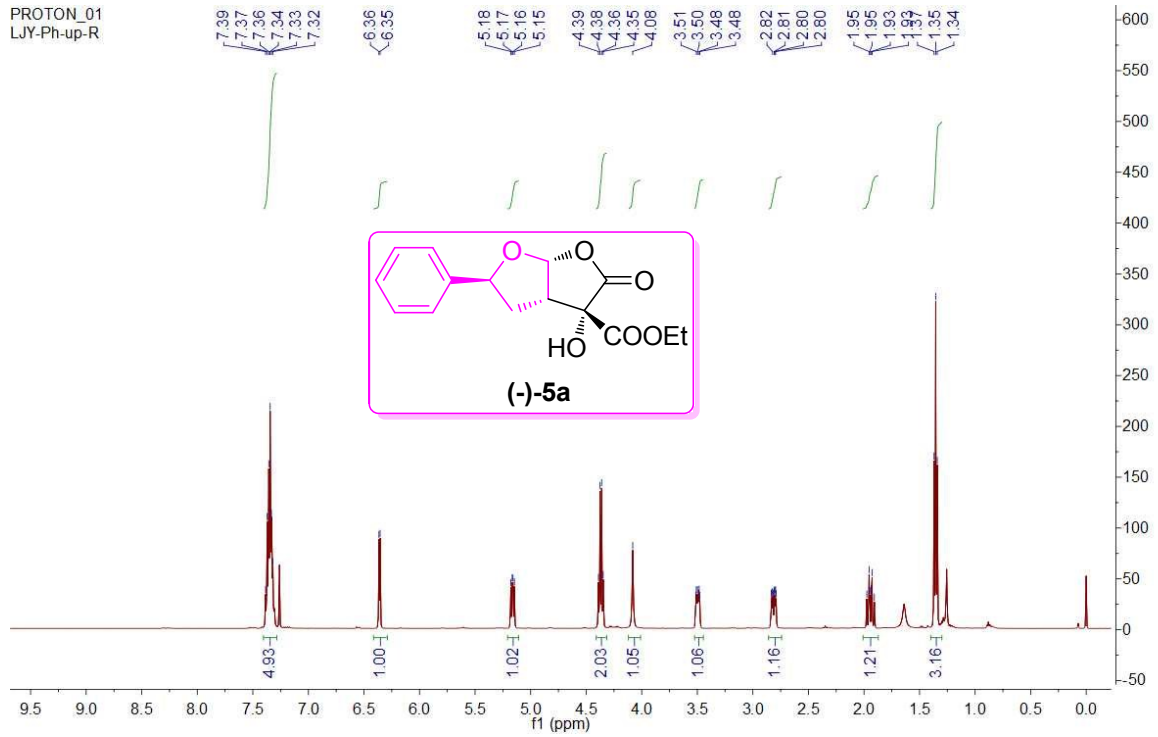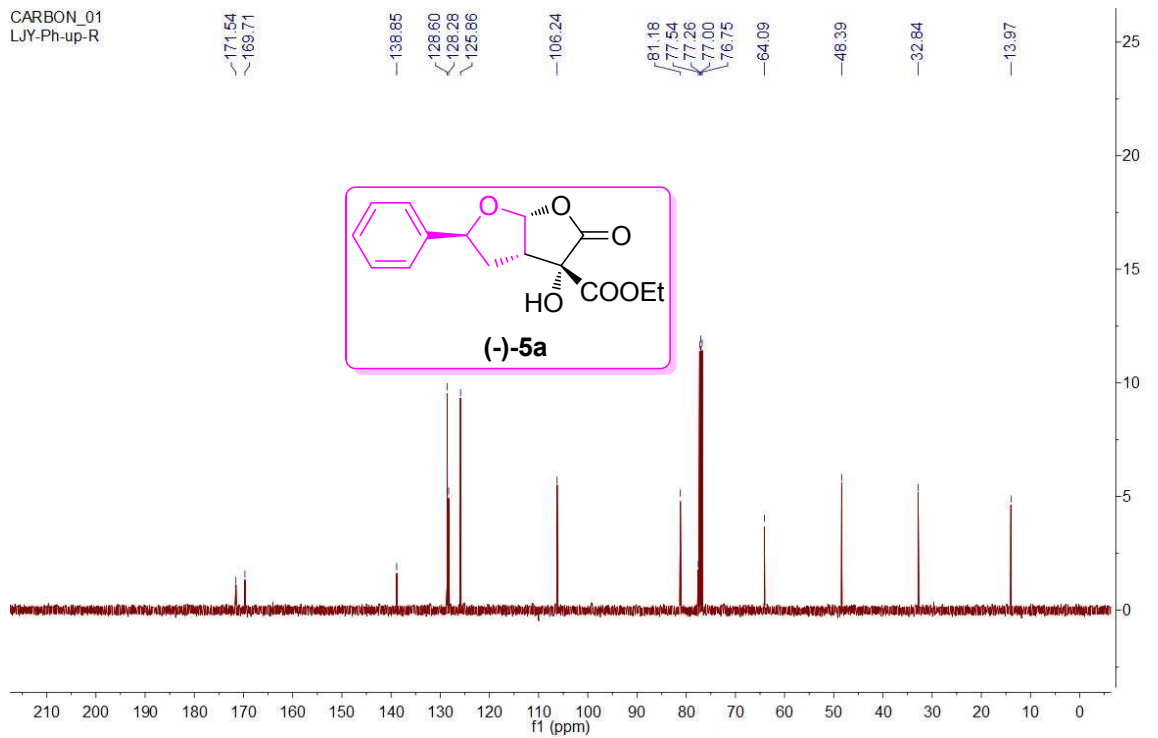

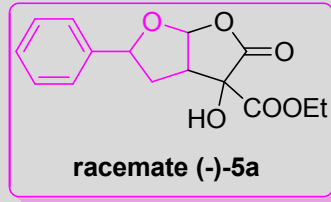

Chrom Type: Fixed WL Chromatogram, 210 nm

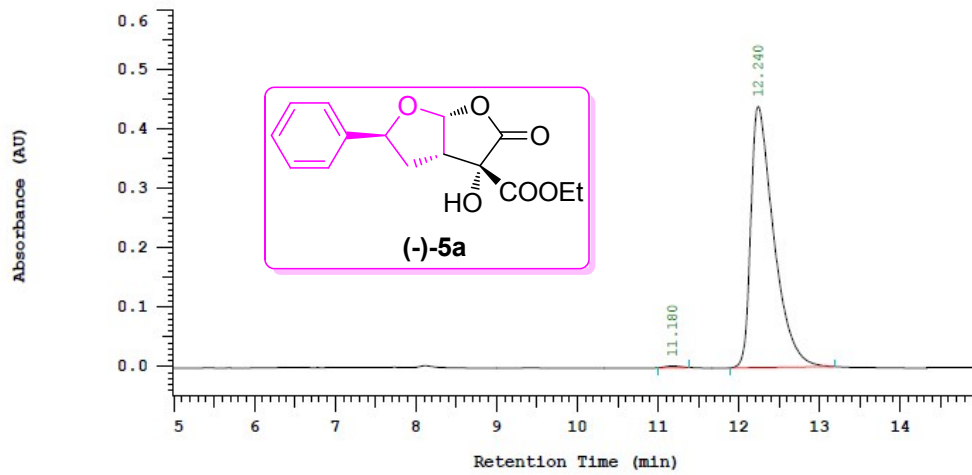

Chrom Type: Fixed WL Chromatogram, 210 nm

Peak Quantitation: AREA  
Calculation Method: AREA%

| No. | RT     | Area    | Area %  | BC |
|-----|--------|---------|---------|----|
| 1   | 11.180 | 18639   | 0.427   | BB |
| 2   | 12.240 | 4350756 | 99.573  | BB |
|     |        | 4369395 | 100.000 |    |

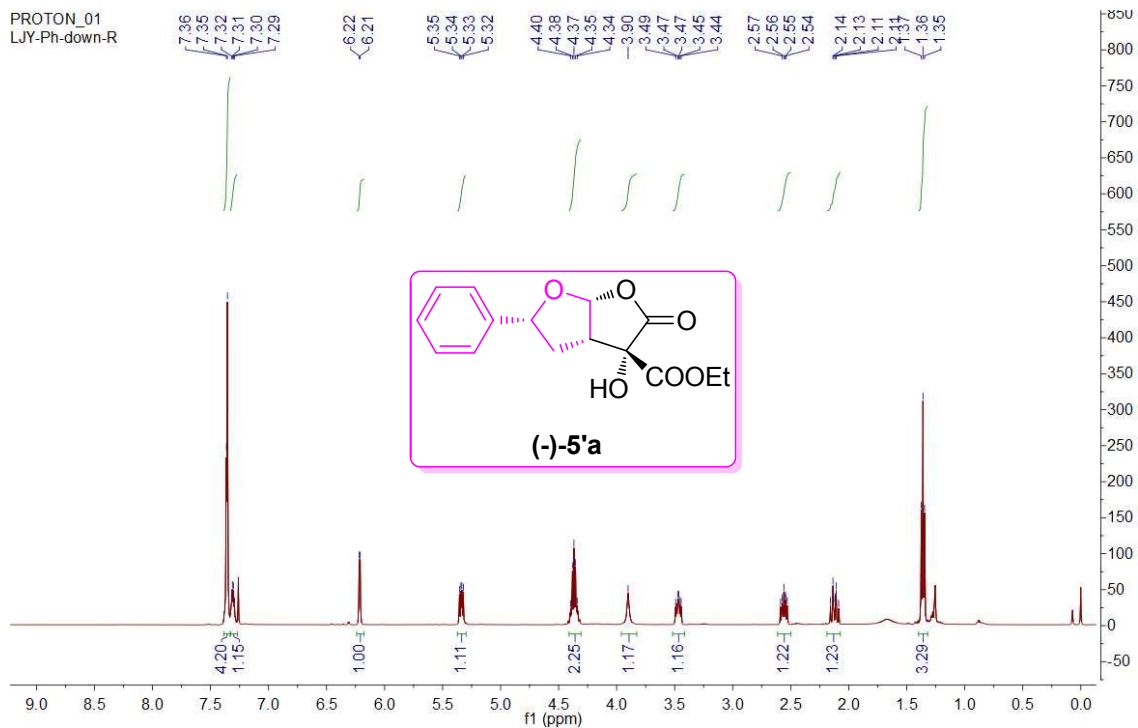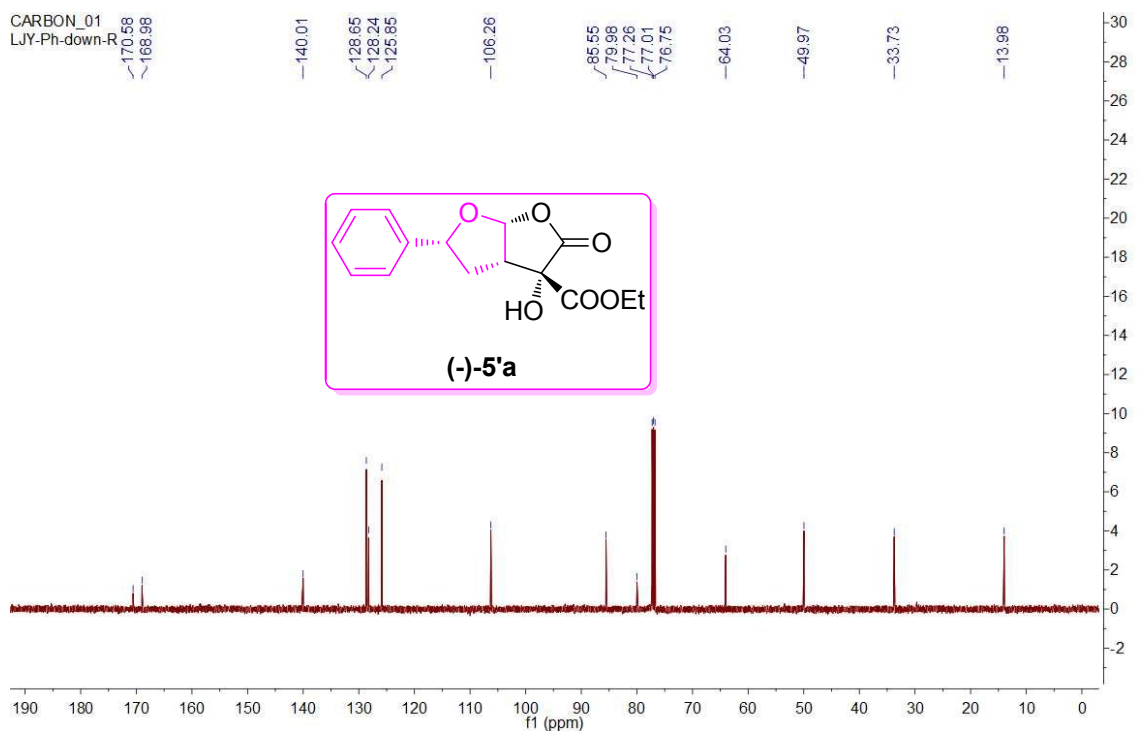

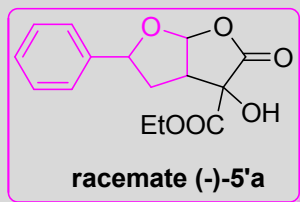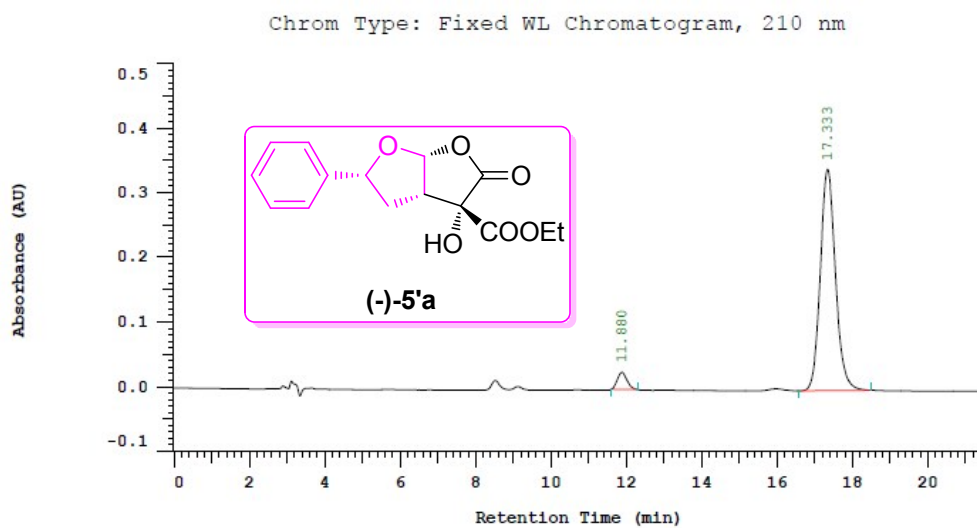

Chrom Type: Fixed WL Chromatogram, 210 nm

Peak Quantitation: AREA  
Calculation Method: AREA%

| No. | RT     | Area    | Area %  | BC |
|-----|--------|---------|---------|----|
| 1   | 11.880 | 235022  | 4.705   | BB |
| 2   | 17.333 | 4760370 | 95.295  | BB |
|     |        | 4995392 | 100.000 |    |

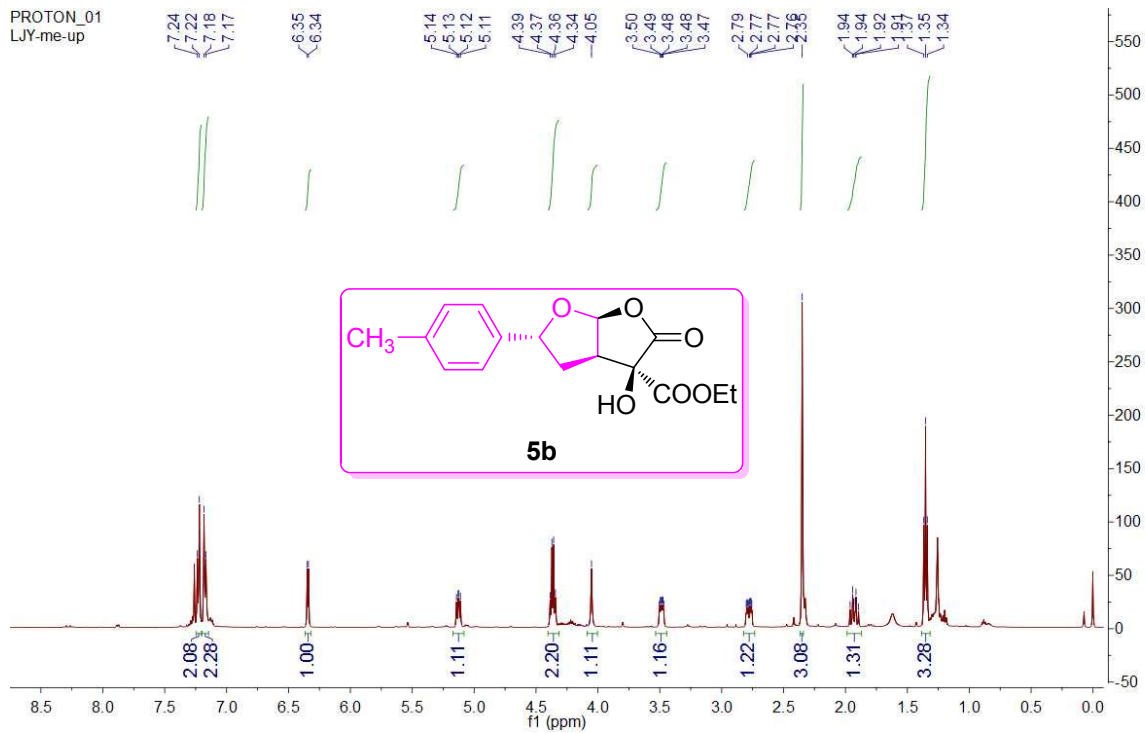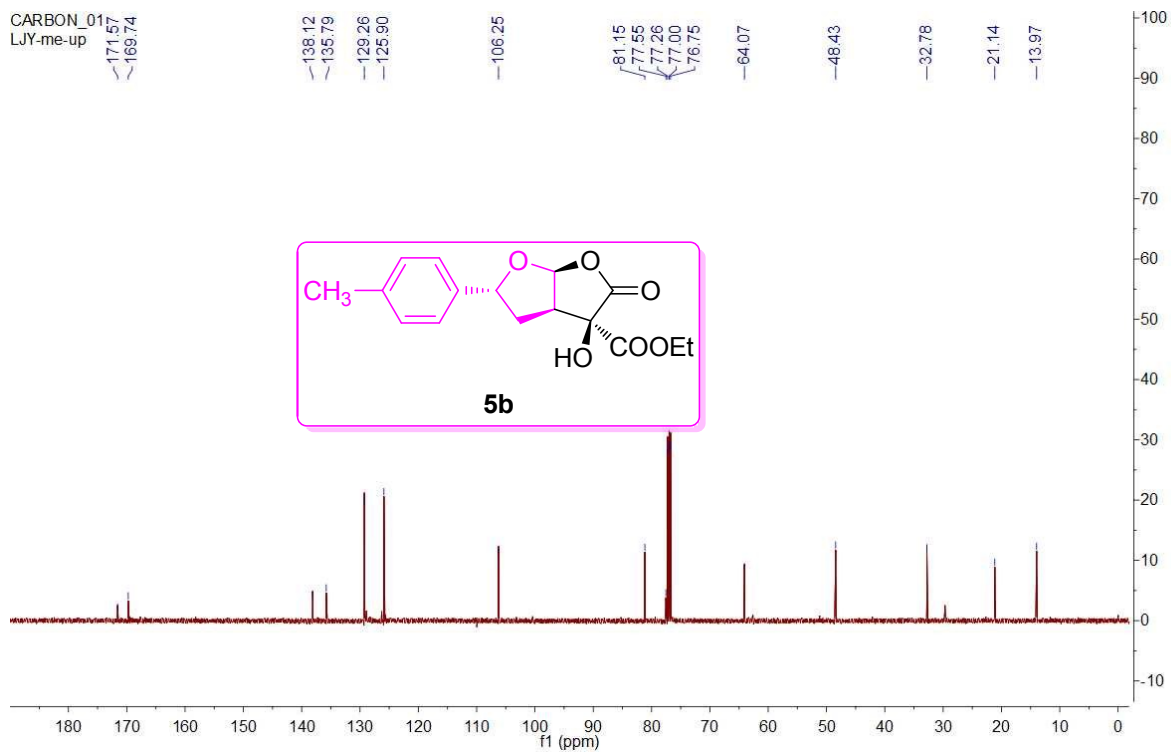

Chrom Type: Fixed WL Chromatogram, 210 nm

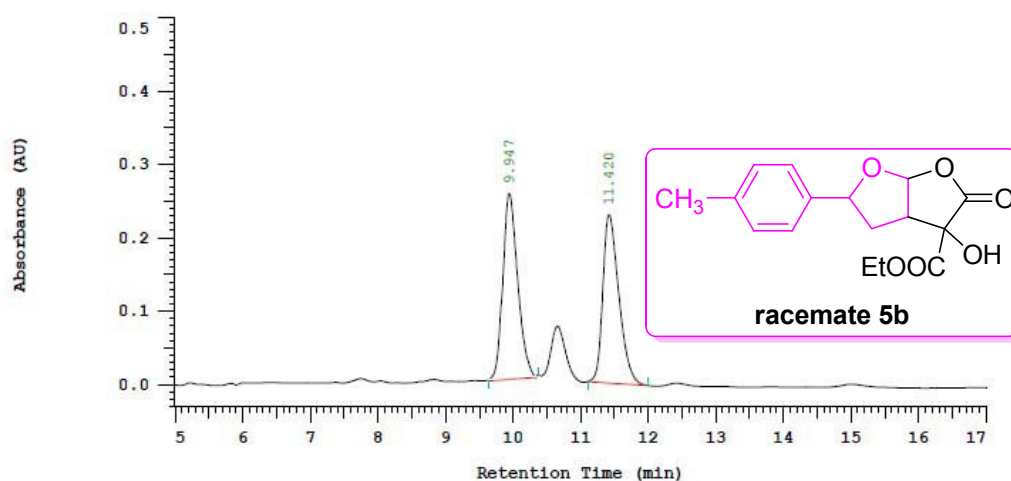

Chrom Type: Fixed WL Chromatogram, 210 nm

Peak Quantitation: AREA  
Calculation Method: AREA%

| No. | RT     | Area     | Area %  | BC |
|-----|--------|----------|---------|----|
| 1   | 9.947  | 5069200  | 48.425  | BB |
| 2   | 11.420 | 5399088  | 51.575  | BB |
|     |        | 10468288 | 100.000 |    |

Chrom Type: Fixed WL Chromatogram, 210 nm

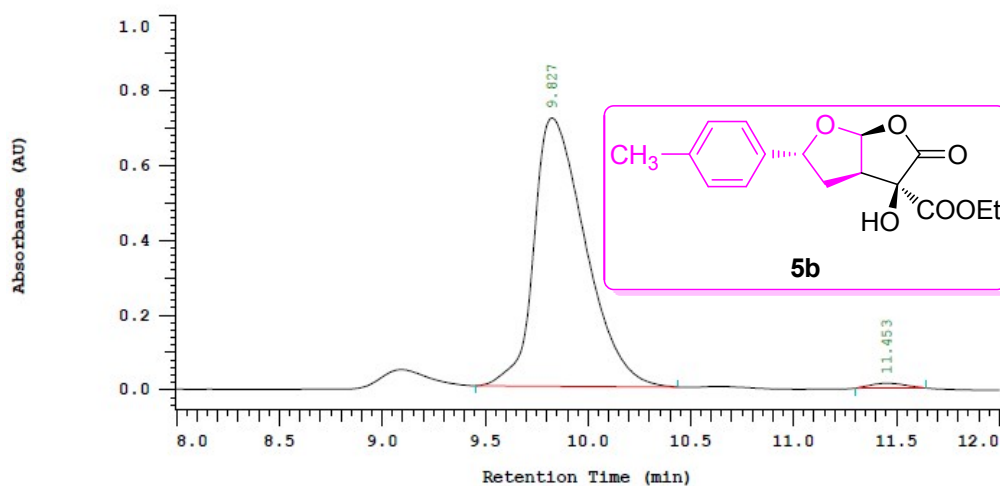

Chrom Type: Fixed WL Chromatogram, 210 nm

Peak Quantitation: AREA  
Calculation Method: AREA%

| No. | RT     | Area    | Area %  | BC |
|-----|--------|---------|---------|----|
| 1   | 9.827  | 6243921 | 98.849  | BB |
| 2   | 11.453 | 72692   | 1.151   | BB |
|     |        | 6316613 | 100.000 |    |

PROTON\_01  
LJY-me-down

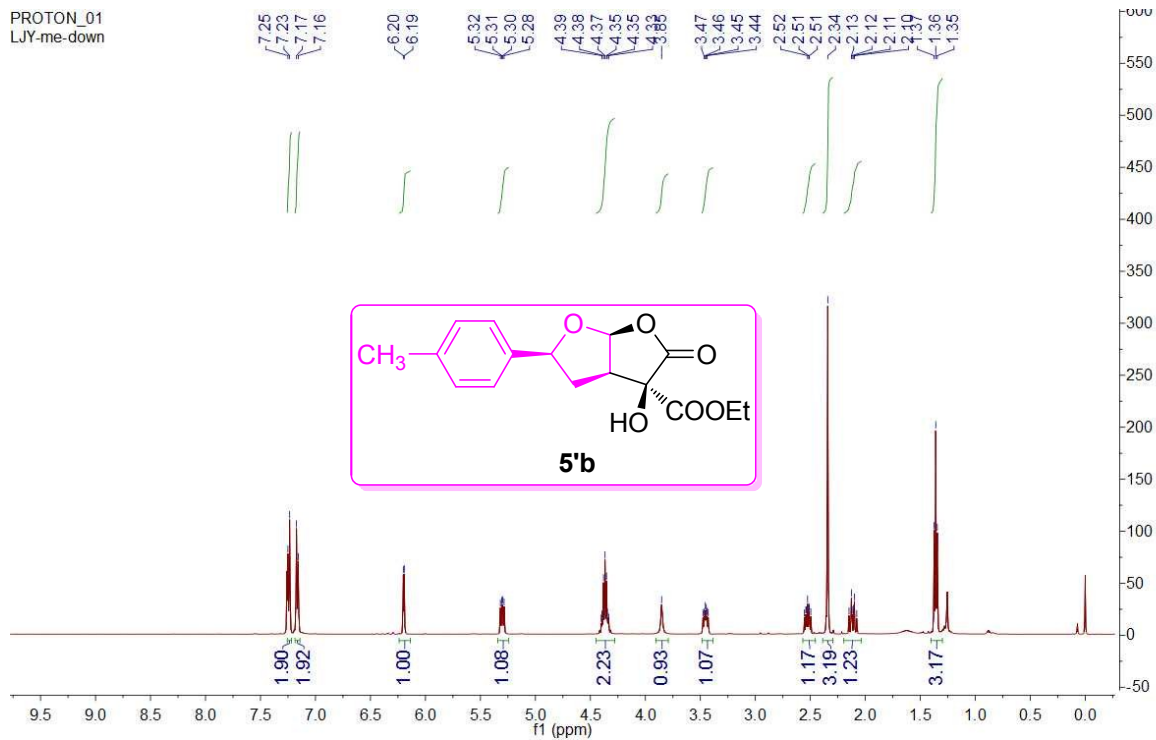

CARBON\_01  
LJY-me-down

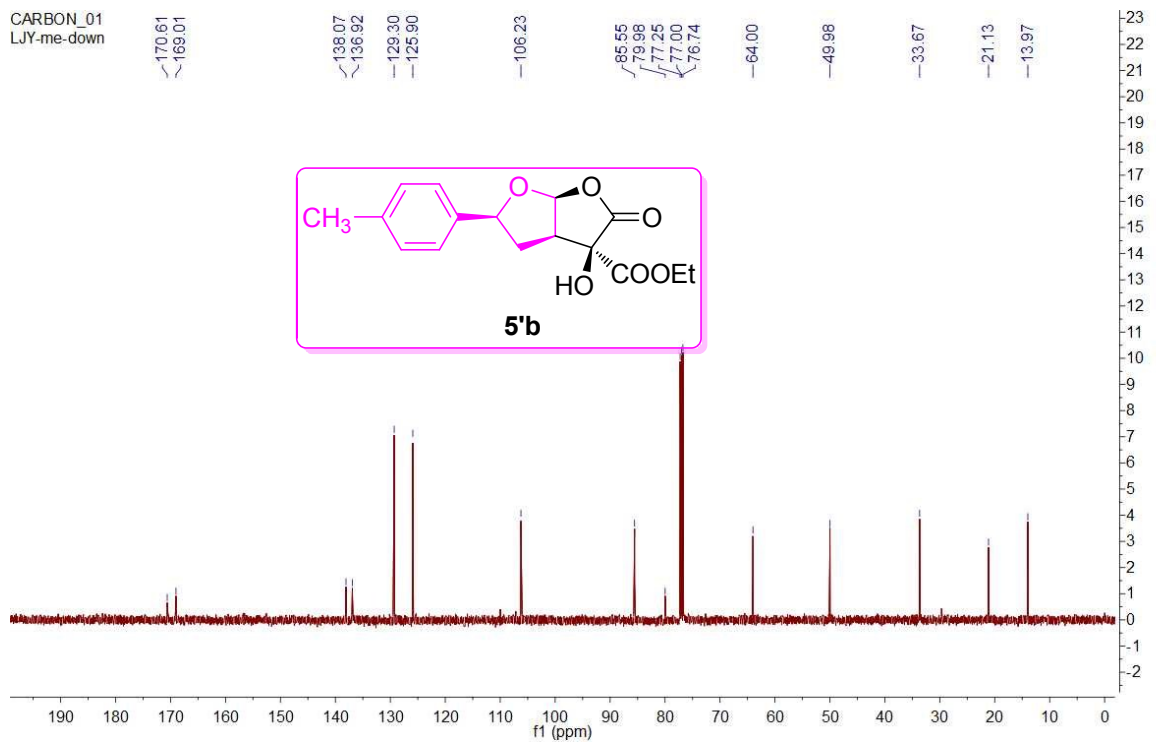

Chrom Type: Fixed WL Chromatogram, 210 nm

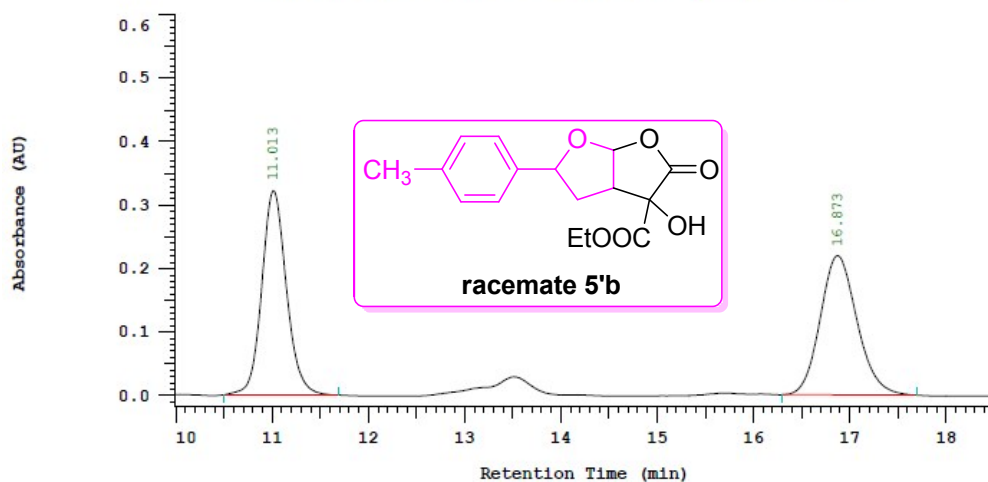

Chrom Type: Fixed WL Chromatogram, 210 nm

Peak Quantitation: AREA  
Calculation Method: AREA%

| No. | RT     | Area    | Area %  | BC |
|-----|--------|---------|---------|----|
| 1   | 11.013 | 2864116 | 49.590  | BB |
| 2   | 16.873 | 2911456 | 50.410  | BB |
|     |        | 5775572 | 100.000 |    |

Chrom Type: Fixed WL Chromatogram, 210 nm

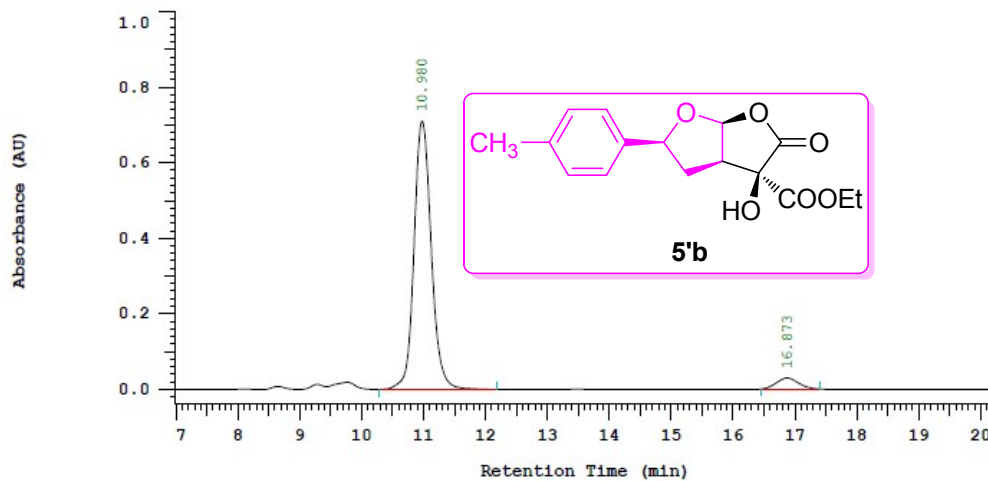

Chrom Type: Fixed WL Chromatogram, 210 nm

Peak Quantitation: AREA  
Calculation Method: AREA%

| No. | RT     | Area    | Area %  | BC |
|-----|--------|---------|---------|----|
| 1   | 10.980 | 6854928 | 95.068  | BB |
| 2   | 16.873 | 355656  | 4.932   | BB |
|     |        | 7210584 | 100.000 |    |



PROTON\_01  
LJY-Meo-up

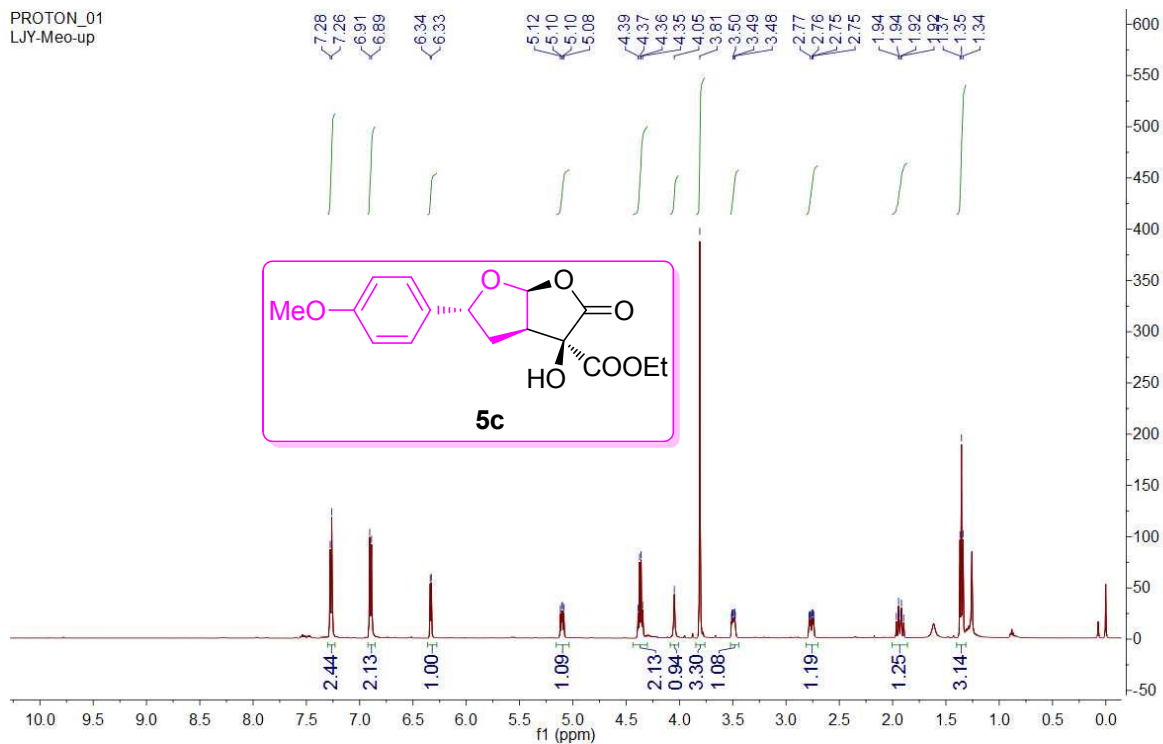

CARBON\_01  
LJY-Meo-up

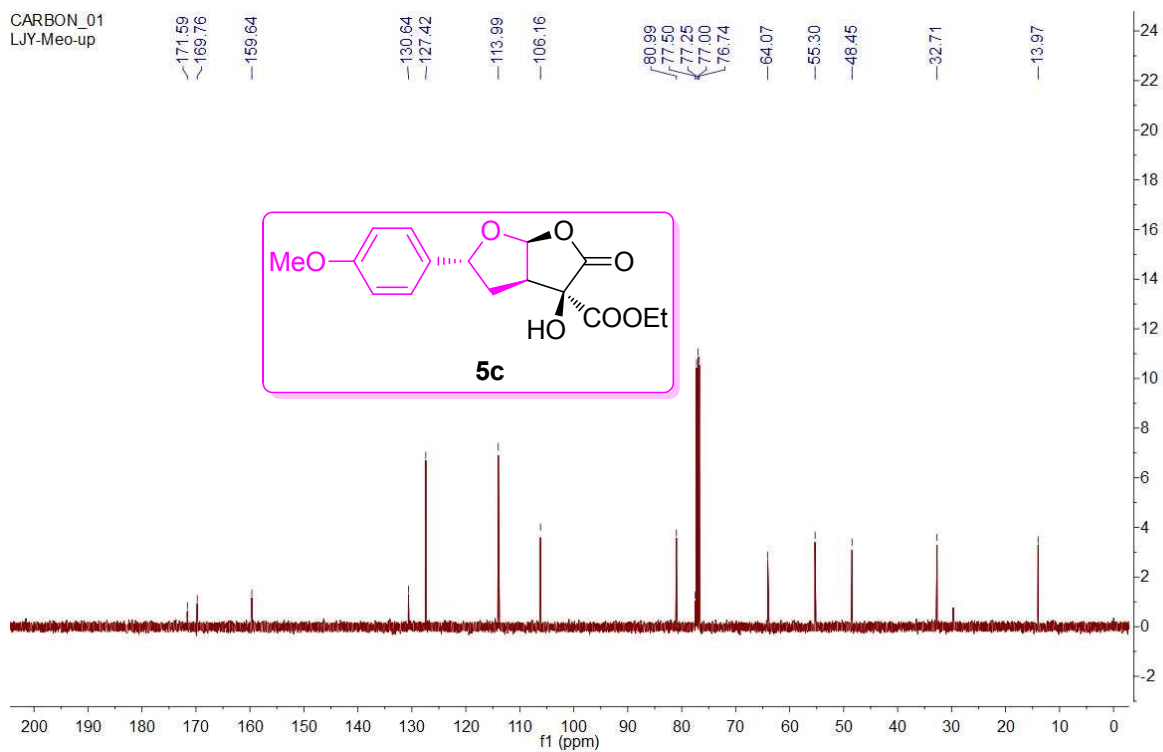

Chrom Type: Fixed WL Chromatogram, 210 nm

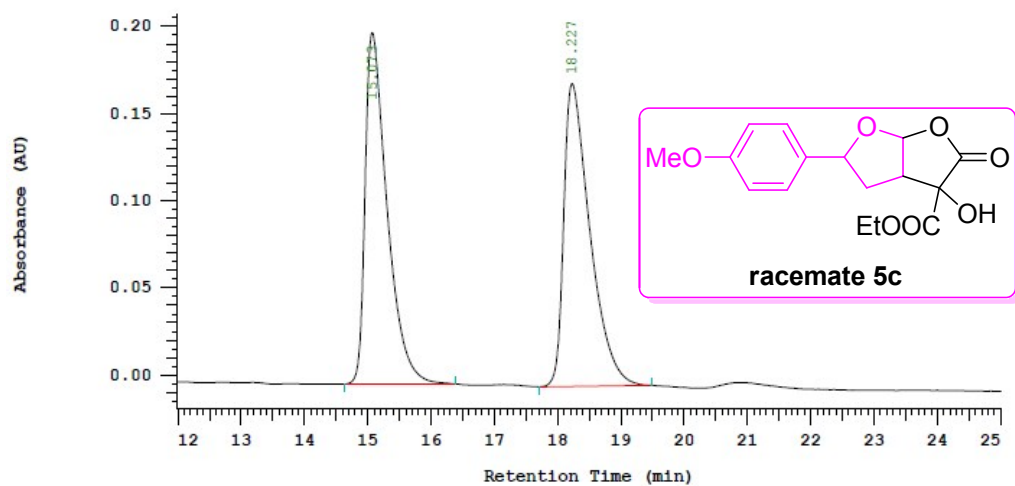

Chrom Type: Fixed WL Chromatogram, 210 nm

Peak Quantitation: AREA  
Calculation Method: AREA%

| No. | RT     | Area    | Area %  | BC |
|-----|--------|---------|---------|----|
| 1   | 15.073 | 2424158 | 49.268  | BB |
| 2   | 18.227 | 2496186 | 50.732  | BB |
|     |        | 4920344 | 100.000 |    |

Chrom Type: Fixed WL Chromatogram, 210 nm

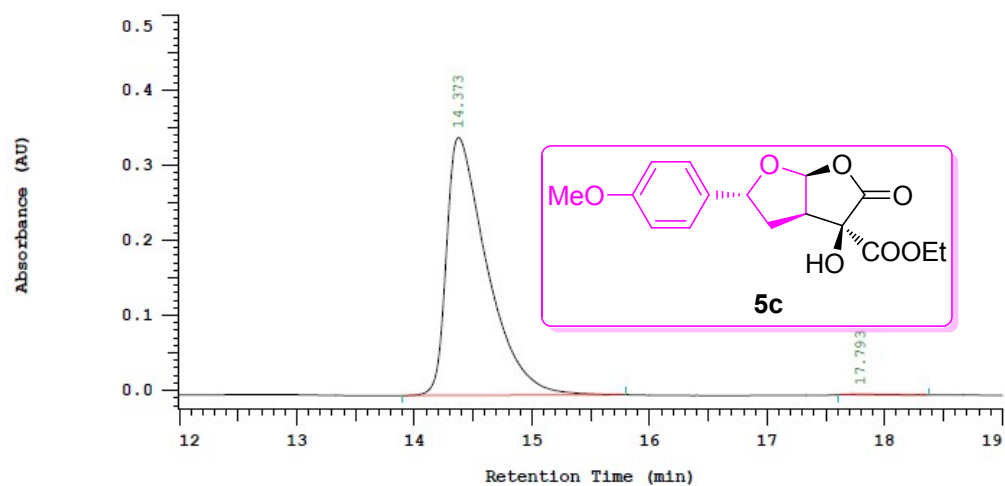

Chrom Type: Fixed WL Chromatogram, 210 nm

Peak Quantitation: AREA  
Calculation Method: AREA%

| No. | RT     | Area    | Area %  | BC |
|-----|--------|---------|---------|----|
| 1   | 14.373 | 4134039 | 99.792  | BB |
| 2   | 17.793 | 8628    | 0.208   | BB |
|     |        | 4142667 | 100.000 |    |

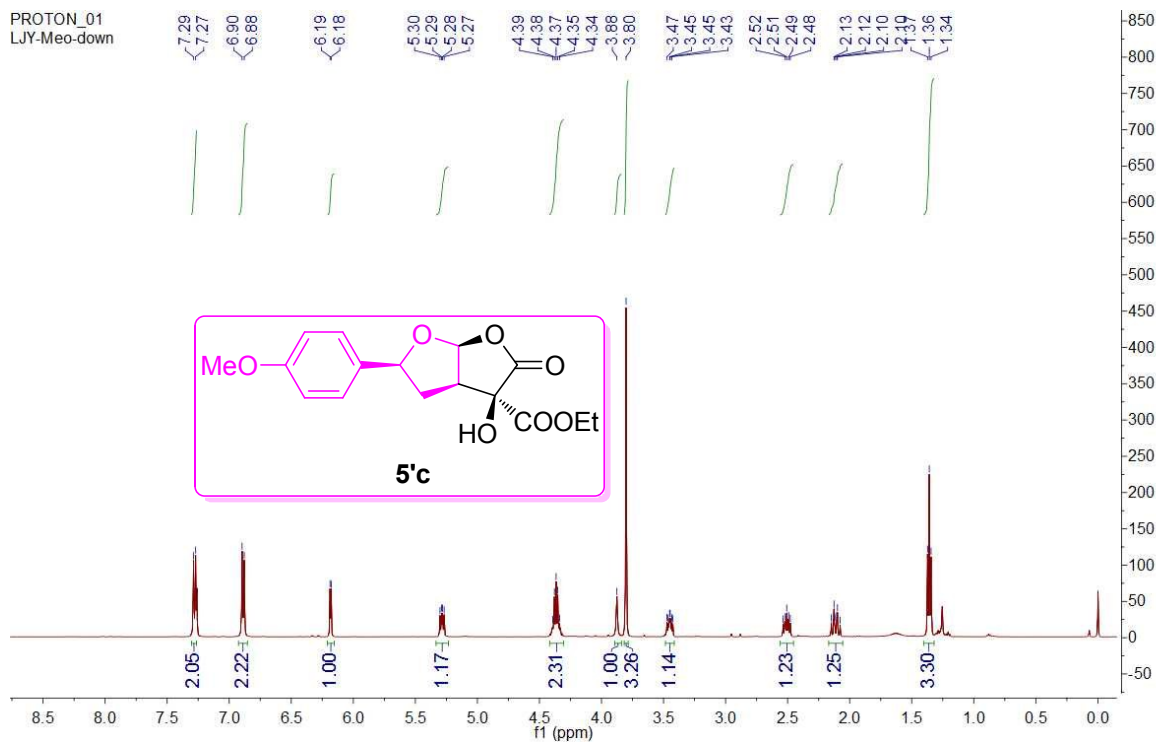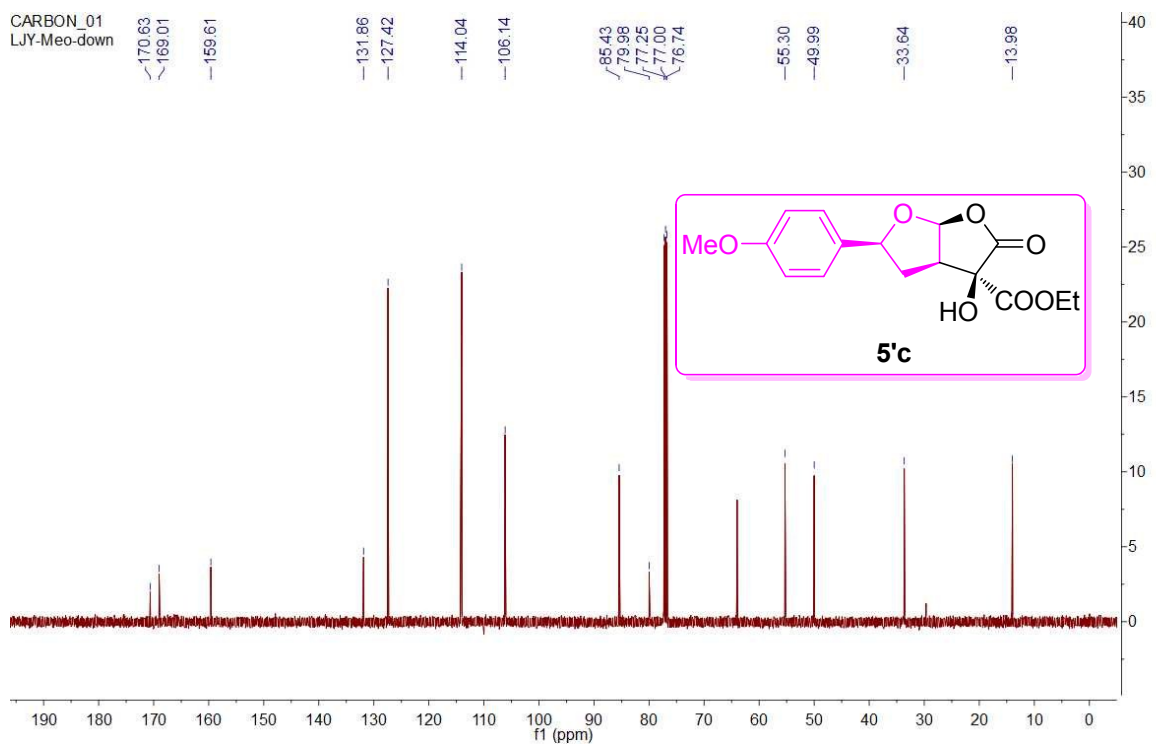

Chrom Type: Fixed WL Chromatogram, 210 nm

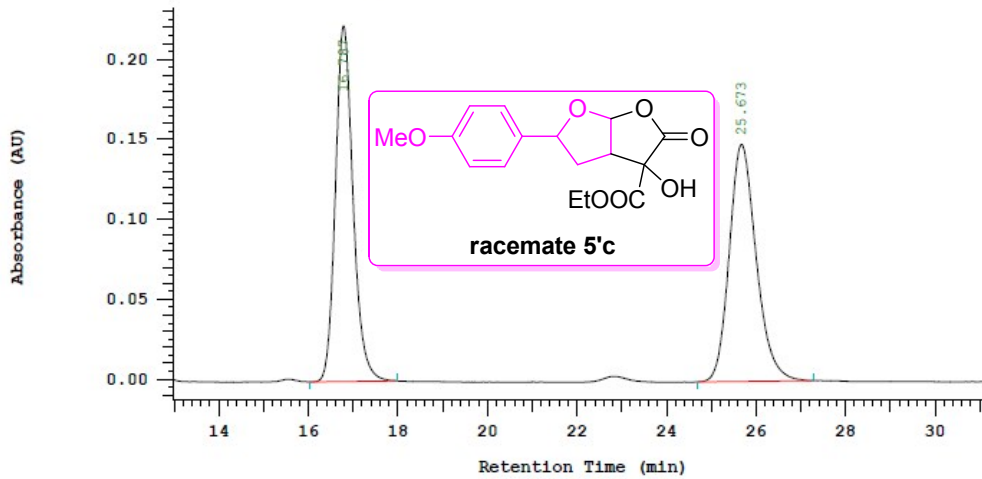

Chrom Type: Fixed WL Chromatogram, 210 nm

Peak Quantitation: AREA  
Calculation Method: AREA%

| No. | RT     | Area    | Area %  | BC |
|-----|--------|---------|---------|----|
| 1   | 16.787 | 3050218 | 49.608  | BB |
| 2   | 25.673 | 3098479 | 50.392  | BB |
|     |        | 6148697 | 100.000 |    |

Chrom Type: Fixed WL Chromatogram, 210 nm

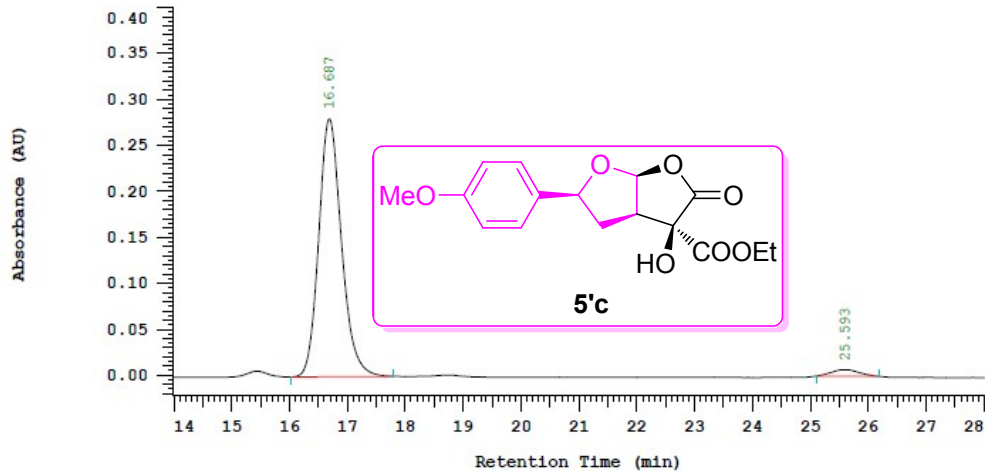

Chrom Type: Fixed WL Chromatogram, 210 nm

Peak Quantitation: AREA  
Calculation Method: AREA%

| No. | RT     | Area    | Area %  | BC |
|-----|--------|---------|---------|----|
| 1   | 16.687 | 3829228 | 96.955  | BB |
| 2   | 25.593 | 120247  | 3.045   | BB |
|     |        | 3949475 | 100.000 |    |

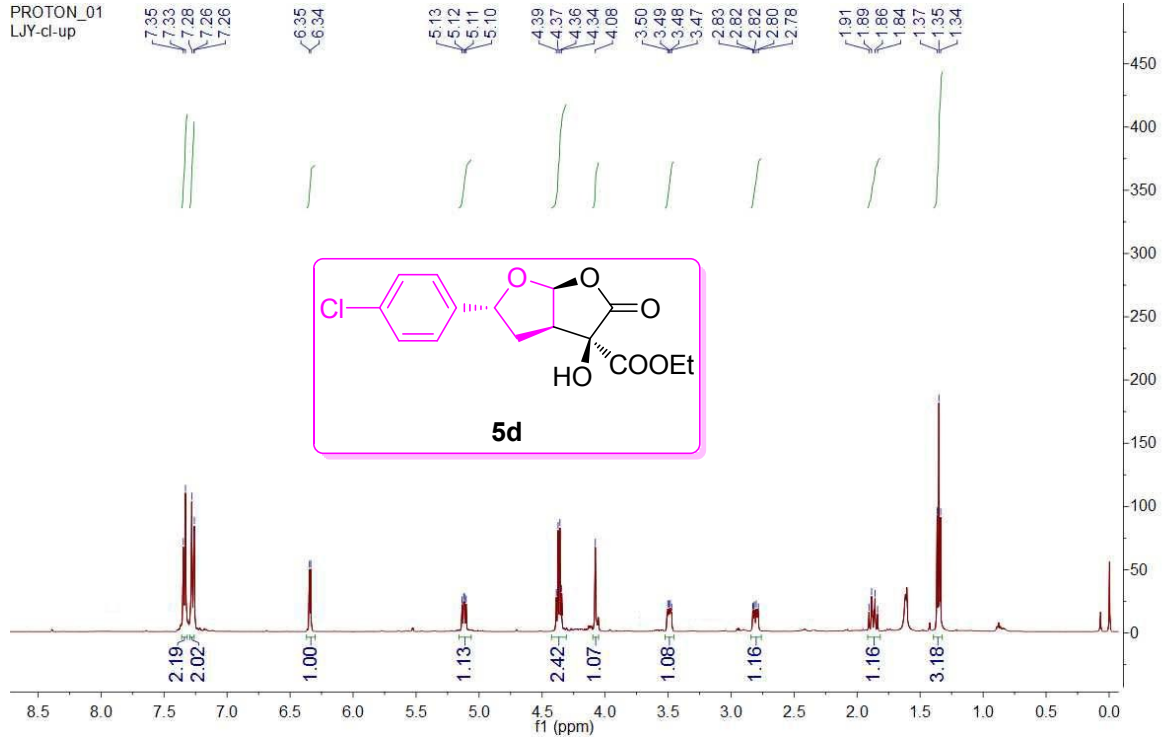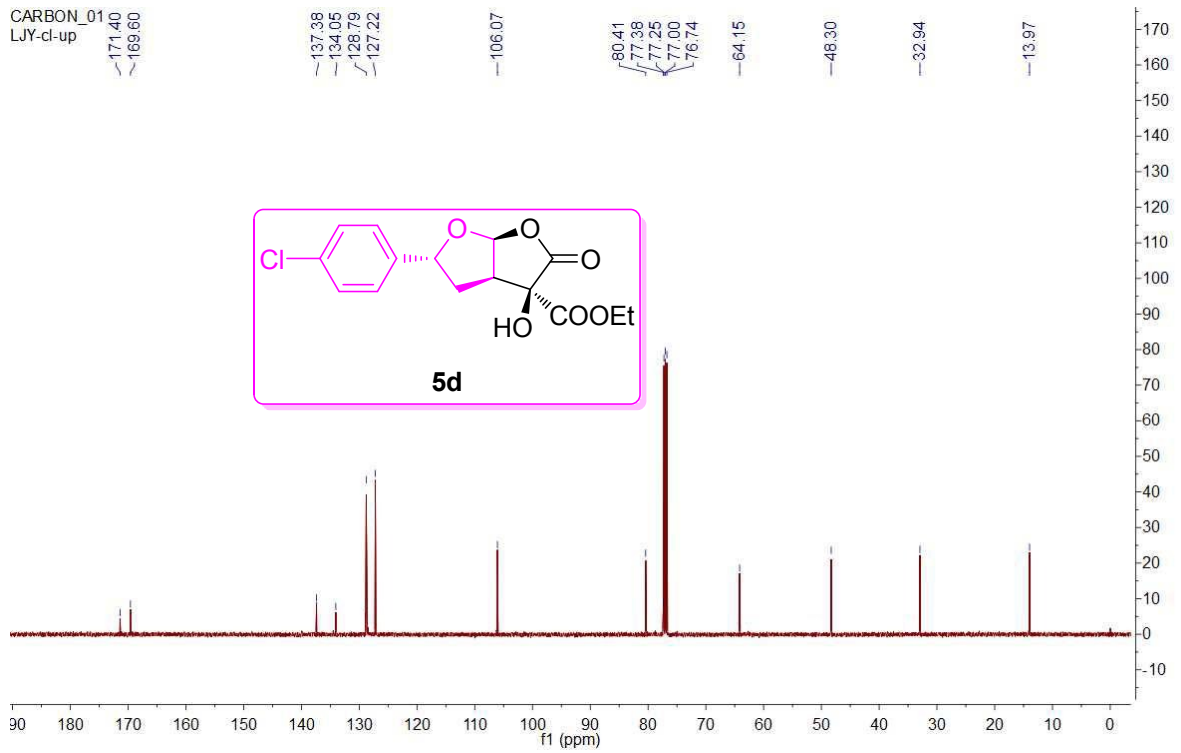

Chrom Type: Fixed WL Chromatogram, 210 nm

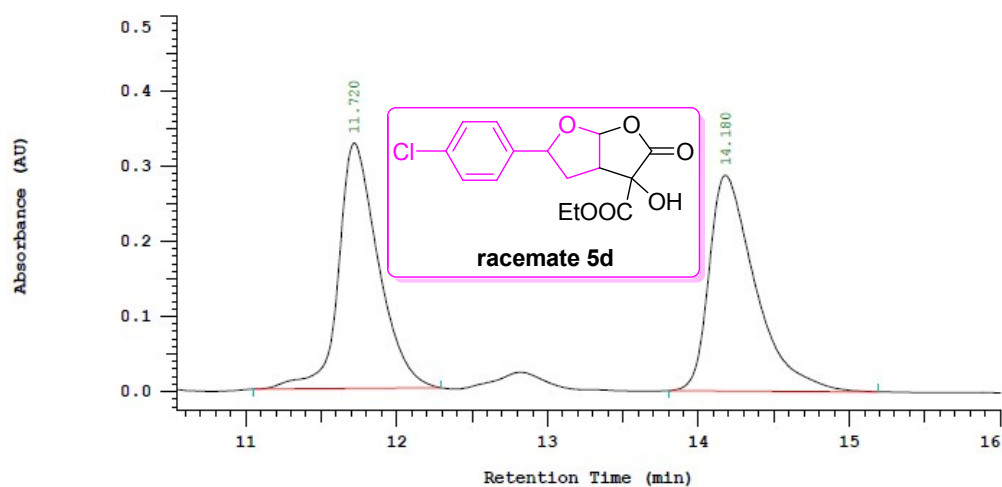

Chrom Type: Fixed WL Chromatogram, 210 nm

Peak Quantitation: AREA  
Calculation Method: AREA%

| No. | RT     | Area    | Area %  | BC |
|-----|--------|---------|---------|----|
| 1   | 11.720 | 2993813 | 49.431  | BB |
| 2   | 14.180 | 3062715 | 50.569  | BB |
|     |        | 6056528 | 100.000 |    |

Chrom Type: Fixed WL Chromatogram, 210 nm

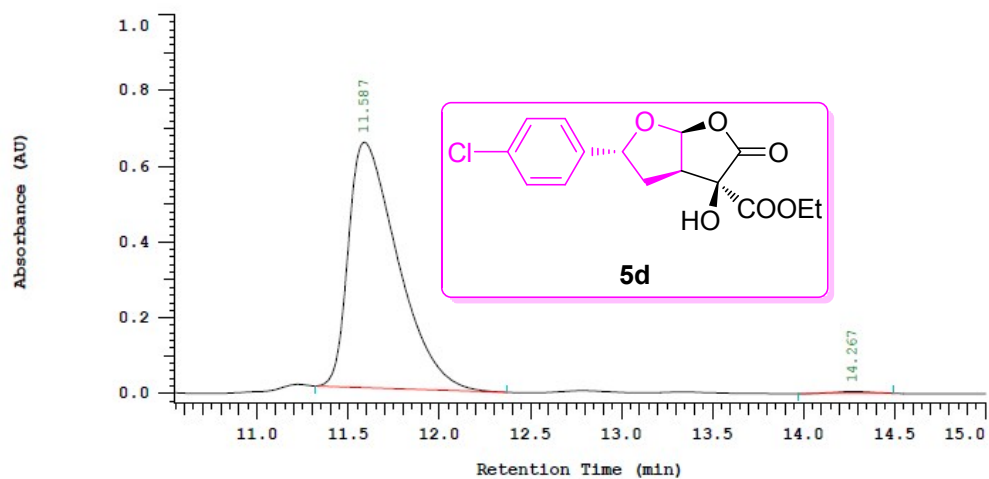

Chrom Type: Fixed WL Chromatogram, 210 nm

Peak Quantitation: AREA  
Calculation Method: AREA%

| No. | RT     | Area    | Area %  | BC |
|-----|--------|---------|---------|----|
| 1   | 11.587 | 6114418 | 99.422  | BB |
| 2   | 14.267 | 35568   | 0.578   | BB |
|     |        | 6149986 | 100.000 |    |

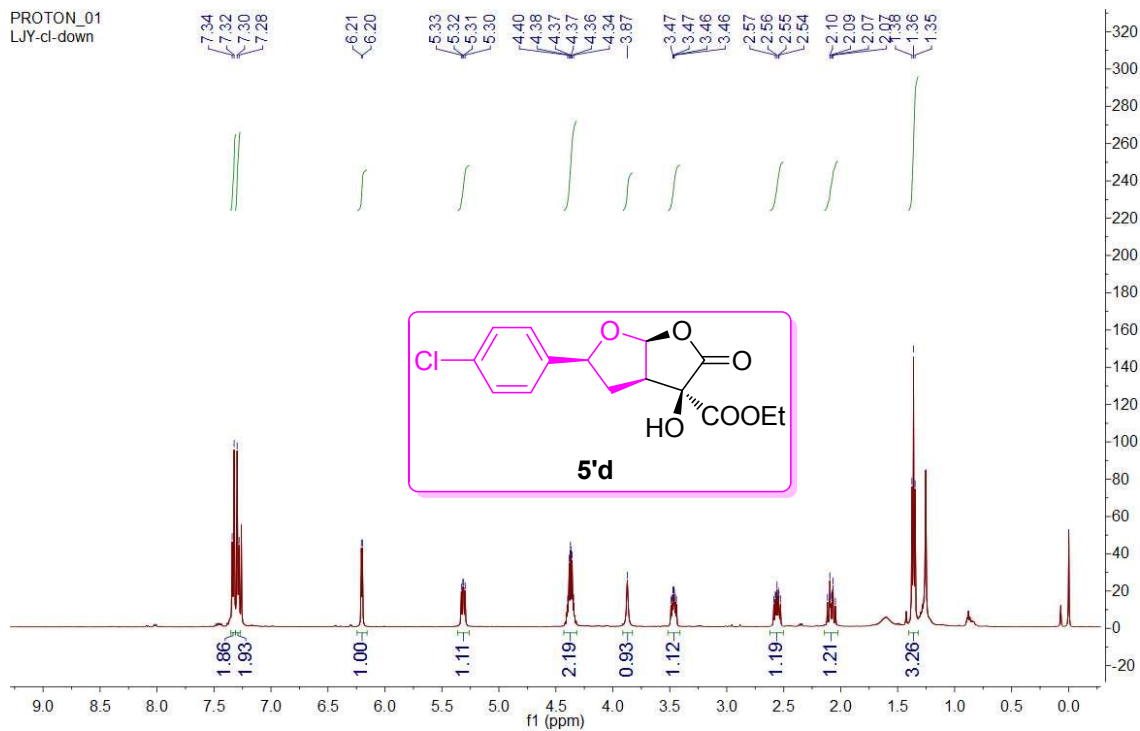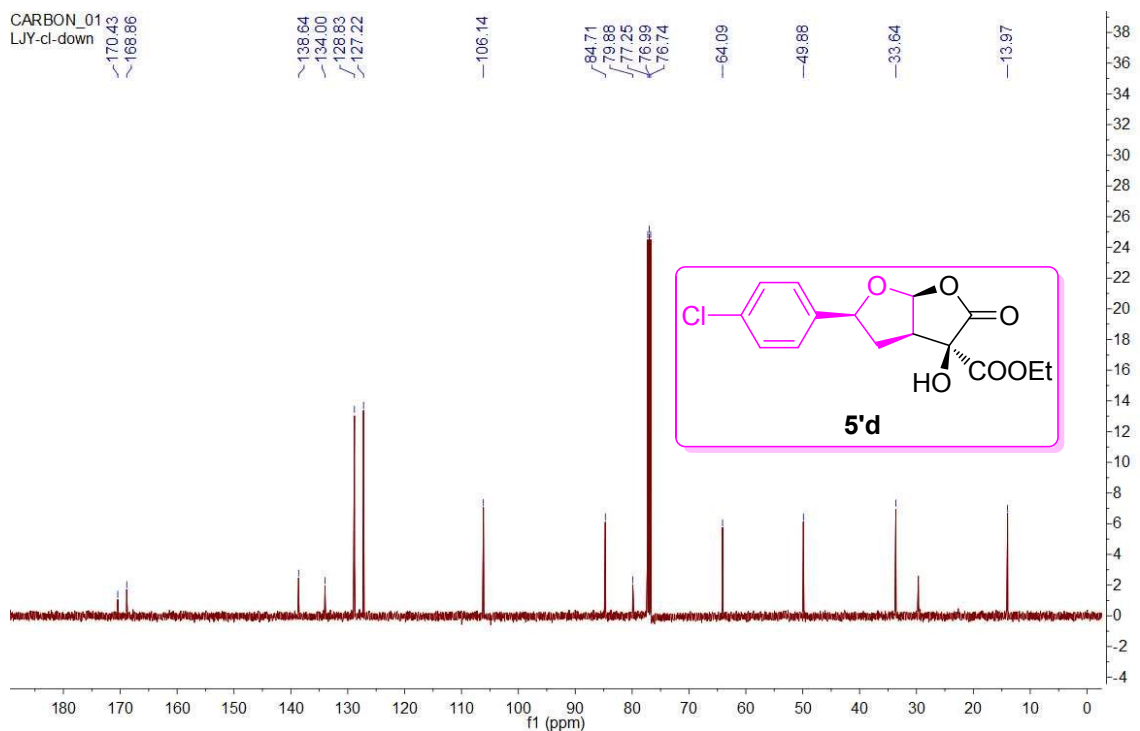

Chrom Type: Fixed WL Chromatogram, 210 nm

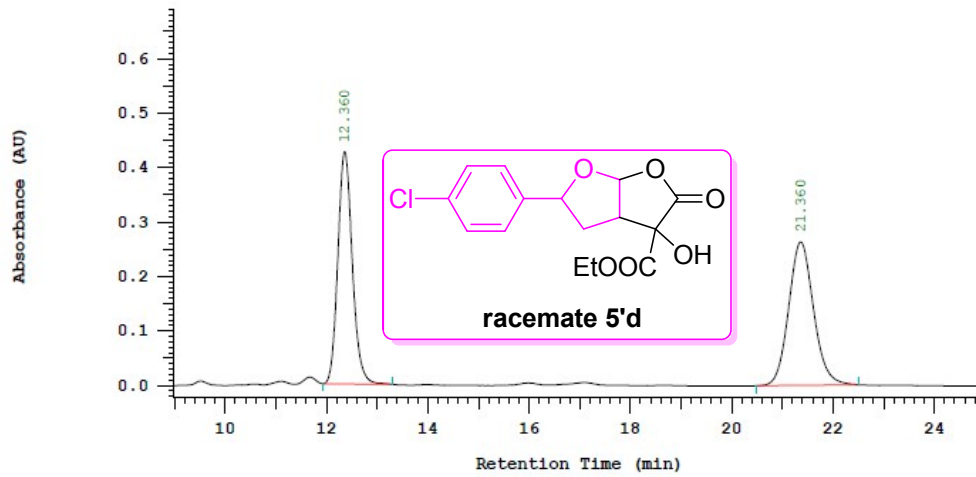

Chrom Type: Fixed WL Chromatogram, 210 nm

Peak Quantitation: AREA  
Calculation Method: AREA%

| No. | RT     | Area    | Area %  | BC |
|-----|--------|---------|---------|----|
| 1   | 12.360 | 4236575 | 48.531  | BB |
| 2   | 21.360 | 4492996 | 51.469  | BB |
|     |        | 8729571 | 100.000 |    |

Chrom Type: Fixed WL Chromatogram, 210 nm

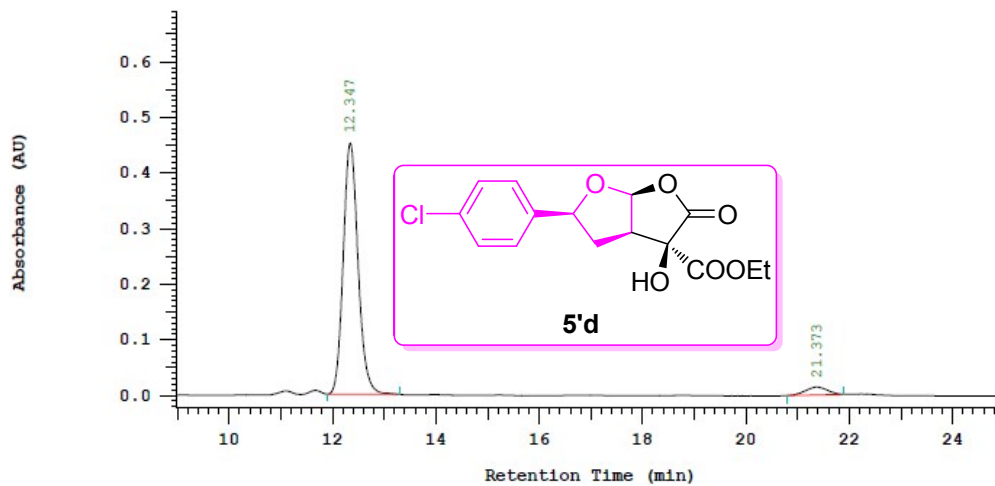

Chrom Type: Fixed WL Chromatogram, 210 nm

Peak Quantitation: AREA  
Calculation Method: AREA%

| No. | RT     | Area    | Area %  | BC |
|-----|--------|---------|---------|----|
| 1   | 12.347 | 4507033 | 95.577  | BB |
| 2   | 21.373 | 208582  | 4.423   | BB |
|     |        | 4715615 | 100.000 |    |



PROTON\_01  
LJY-Br-up

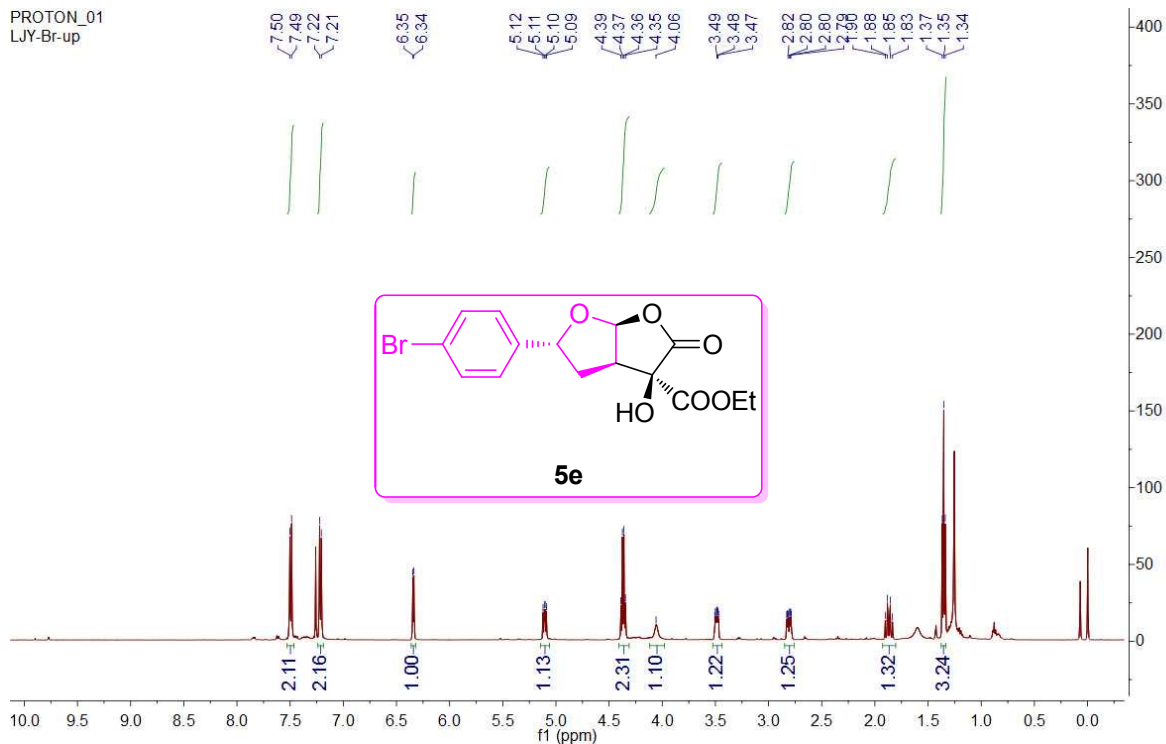

CARBON\_01  
LJY-Br-up

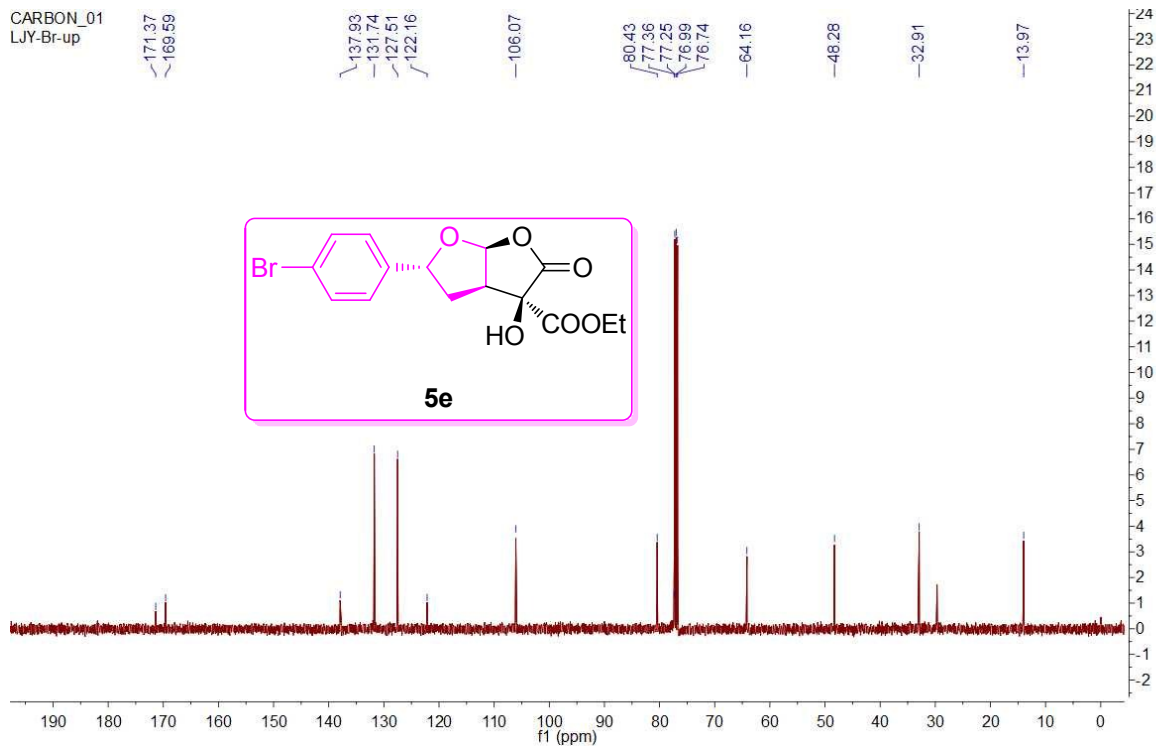

Chrom Type: Fixed WL Chromatogram, 210 nm

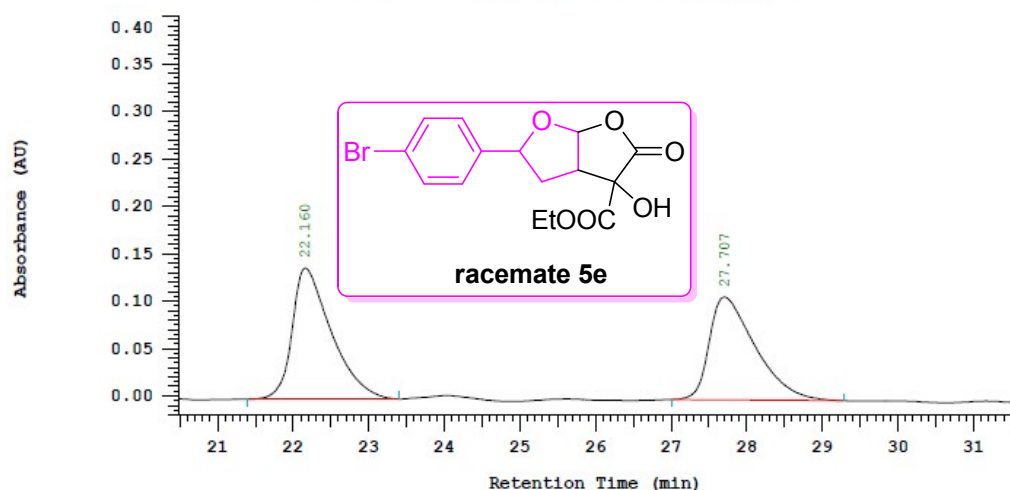

Chrom Type: Fixed WL Chromatogram, 210 nm

Peak Quantitation: AREA  
Calculation Method: AREA%

| No. | RT     | Area    | Area %  | BC |
|-----|--------|---------|---------|----|
| 1   | 22.160 | 2484514 | 52.008  | BB |
| 2   | 27.707 | 2292666 | 47.992  | BB |
|     |        | 4777180 | 100.000 |    |

Chrom Type: Fixed WL Chromatogram, 210 nm

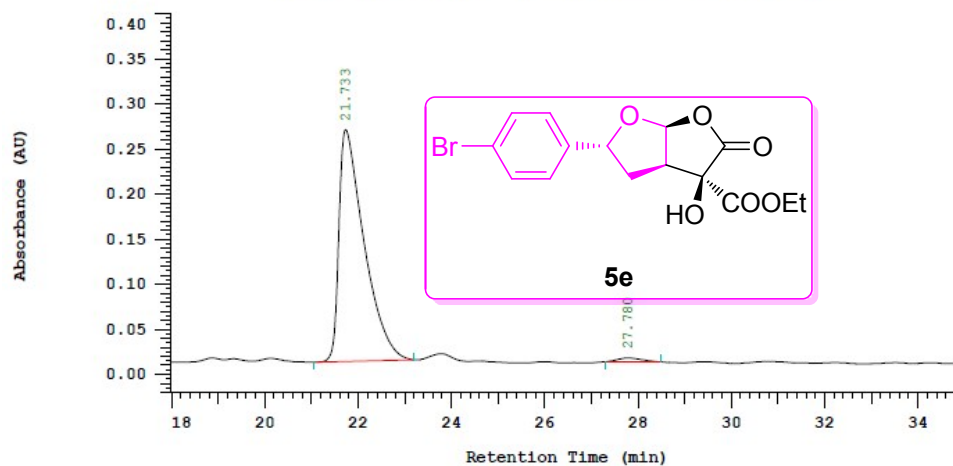

Chrom Type: Fixed WL Chromatogram, 210 nm

Peak Quantitation: AREA  
Calculation Method: AREA%

| No. | RT     | Area    | Area %  | BC |
|-----|--------|---------|---------|----|
| 1   | 21.733 | 4817629 | 98.446  | BB |
| 2   | 27.780 | 76072   | 1.554   | BB |
|     |        | 4893701 | 100.000 |    |

PROTON\_01  
LJY-Br-down

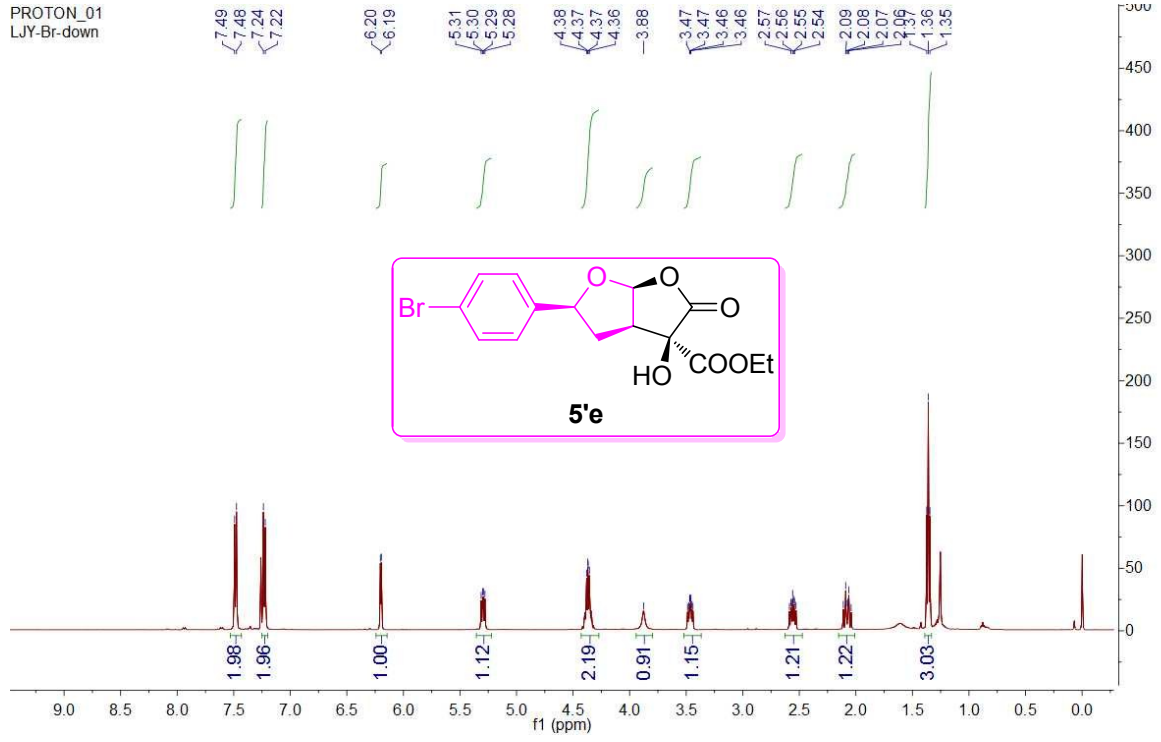

CARBON\_01  
LJY-Br-down

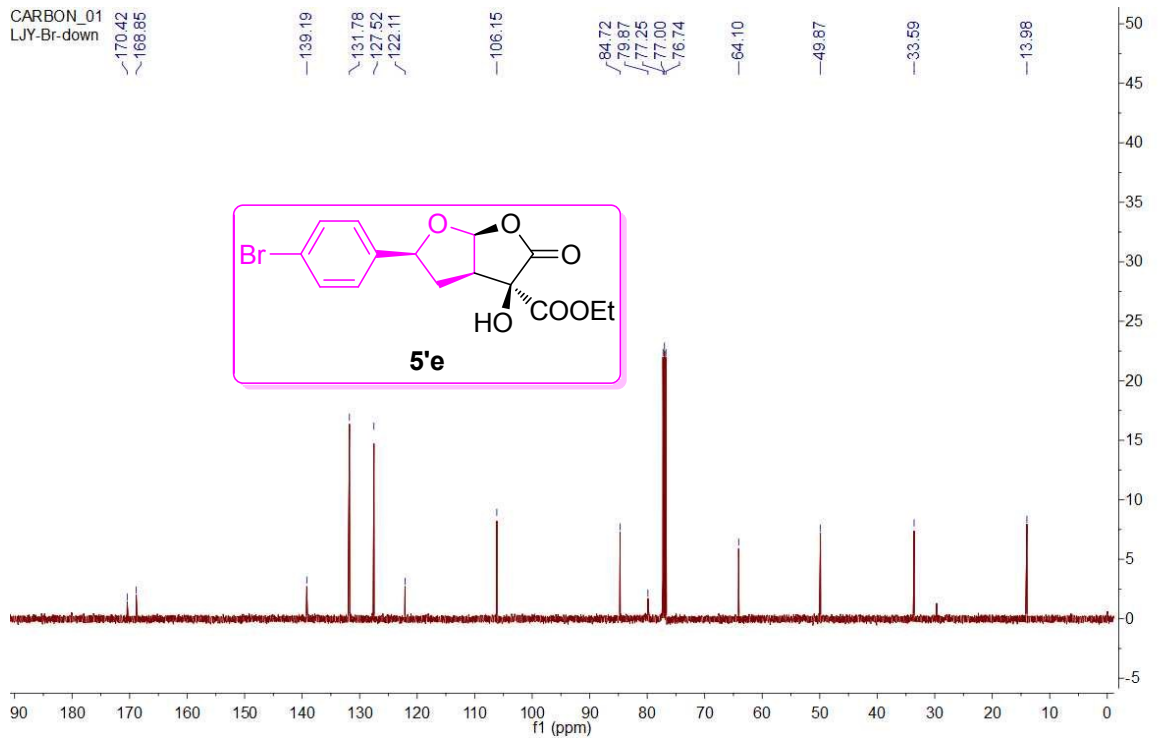

Chrom Type: Fixed WL Chromatogram, 210 nm

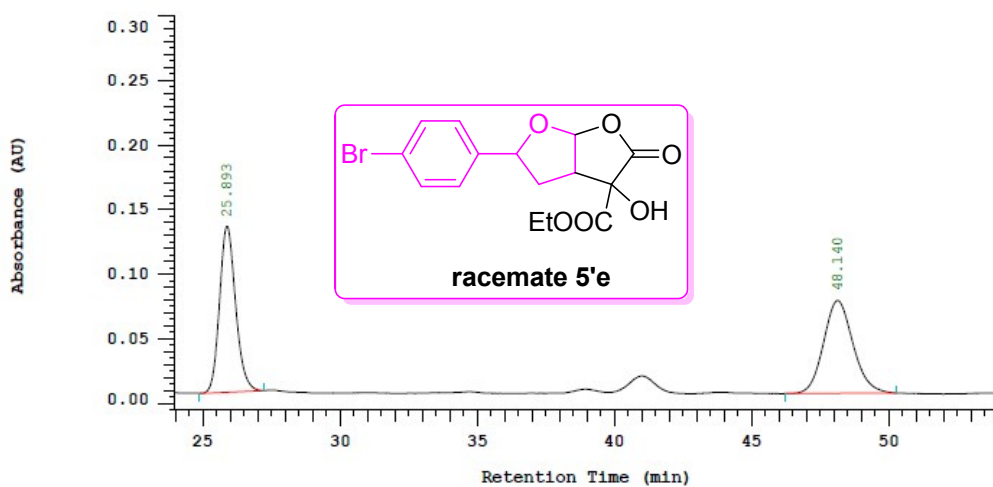

Chrom Type: Fixed WL Chromatogram, 210 nm

Peak Quantitation: AREA  
Calculation Method: AREA%

| No. | RT     | Area    | Area %  | BC |
|-----|--------|---------|---------|----|
| 1   | 25.893 | 2604697 | 49.380  | BB |
| 2   | 48.140 | 2670089 | 50.620  | BB |
|     |        | 5274786 | 100.000 |    |

Chrom Type: Fixed WL Chromatogram, 210 nm

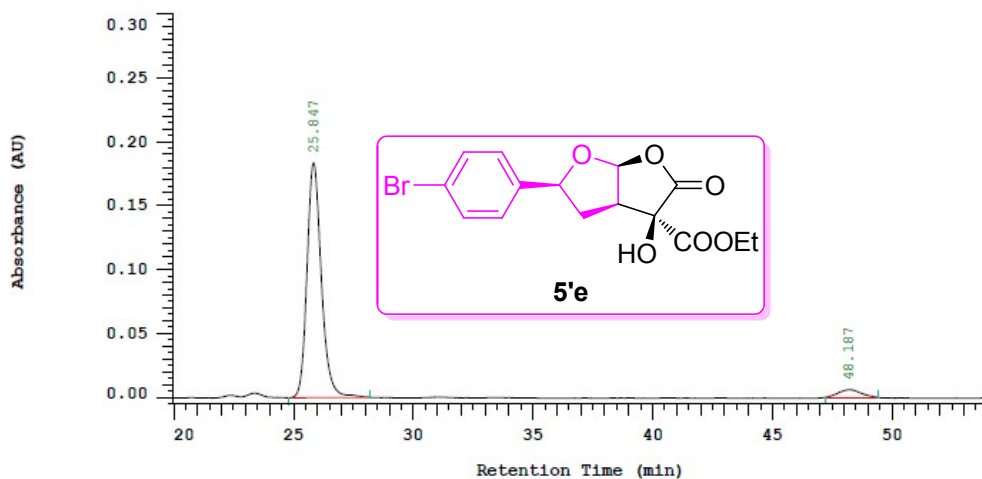

Chrom Type: Fixed WL Chromatogram, 210 nm

Peak Quantitation: AREA  
Calculation Method: AREA%

| No. | RT     | Area    | Area %  | BC |
|-----|--------|---------|---------|----|
| 1   | 25.847 | 3804105 | 95.051  | BB |
| 2   | 48.187 | 198060  | 4.949   | BB |
|     |        | 4002165 | 100.000 |    |

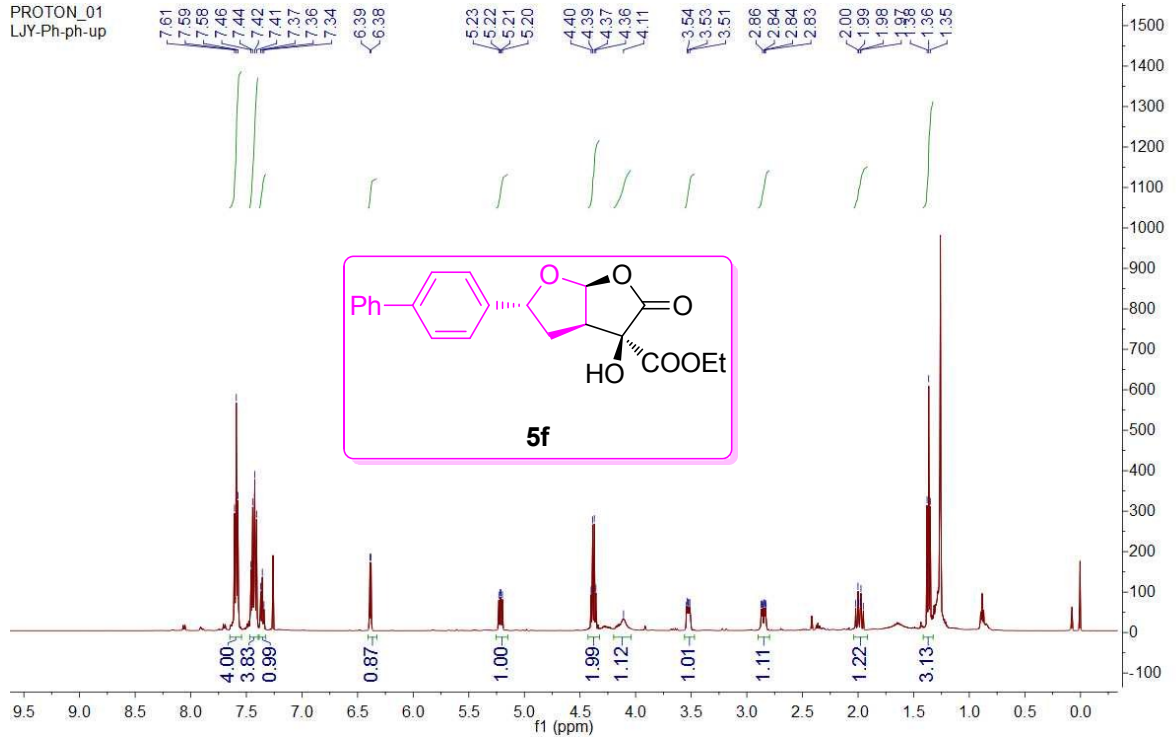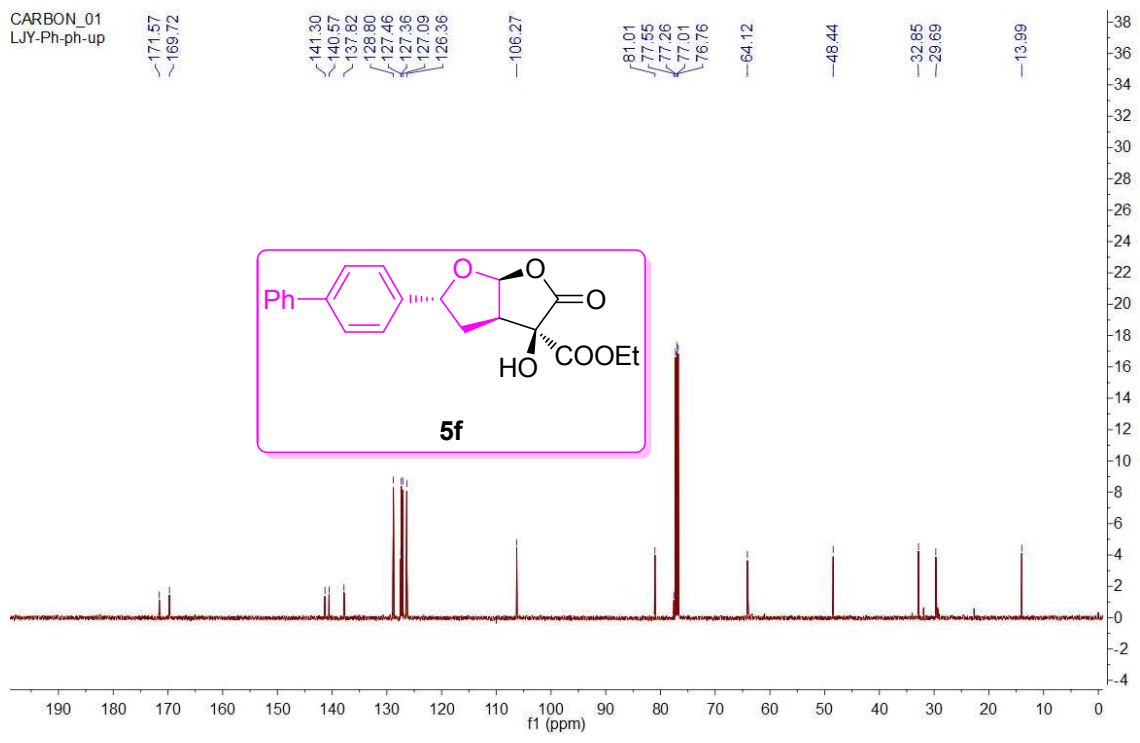

Chrom Type: Fixed WL Chromatogram, 210 nm

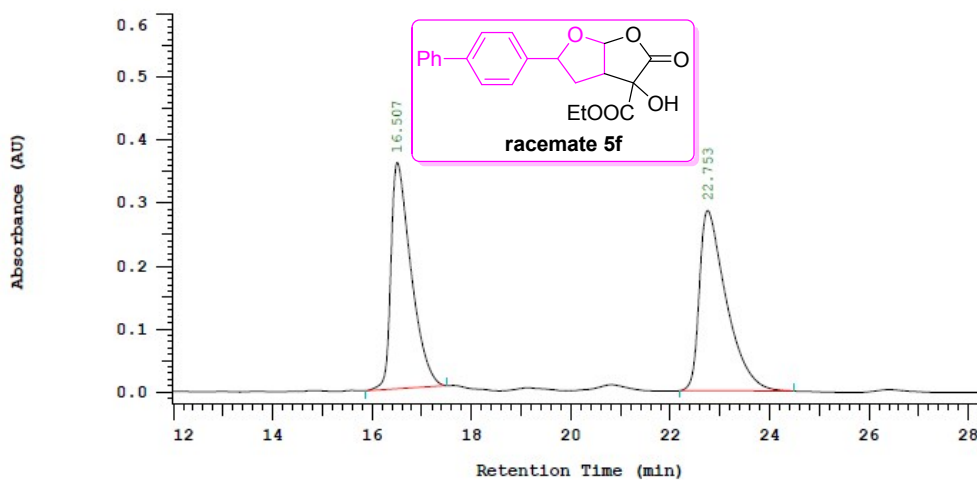

Chrom Type: Fixed WL Chromatogram, 210 nm

Peak Quantitation: AREA  
Calculation Method: AREA%

| No. | RT     | Area     | Area %  | BC |
|-----|--------|----------|---------|----|
| 1   | 16.507 | 5069276  | 48.425  | BB |
| 2   | 22.753 | 5399022  | 51.575  | BB |
|     |        | 10468298 | 100.000 |    |

Chrom Type: Fixed WL Chromatogram, 210 nm

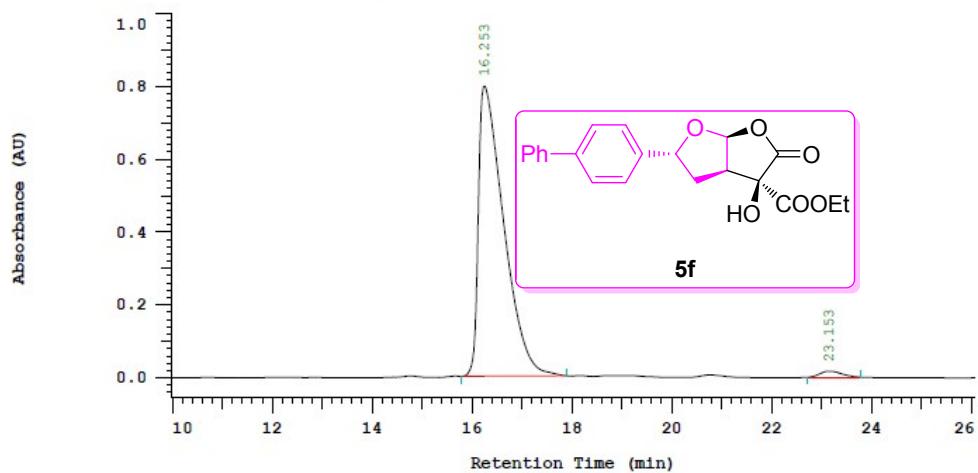

Chrom Type: Fixed WL Chromatogram, 210 nm

Peak Quantitation: AREA  
Calculation Method: AREA%

| No. | RT     | Area     | Area %  | BC |
|-----|--------|----------|---------|----|
| 1   | 16.253 | 14030490 | 98.201  | BB |
| 2   | 23.153 | 257078   | 1.799   | BB |
|     |        | 14287568 | 100.000 |    |

PROTON\_01  
LJY-Ph-ph-down

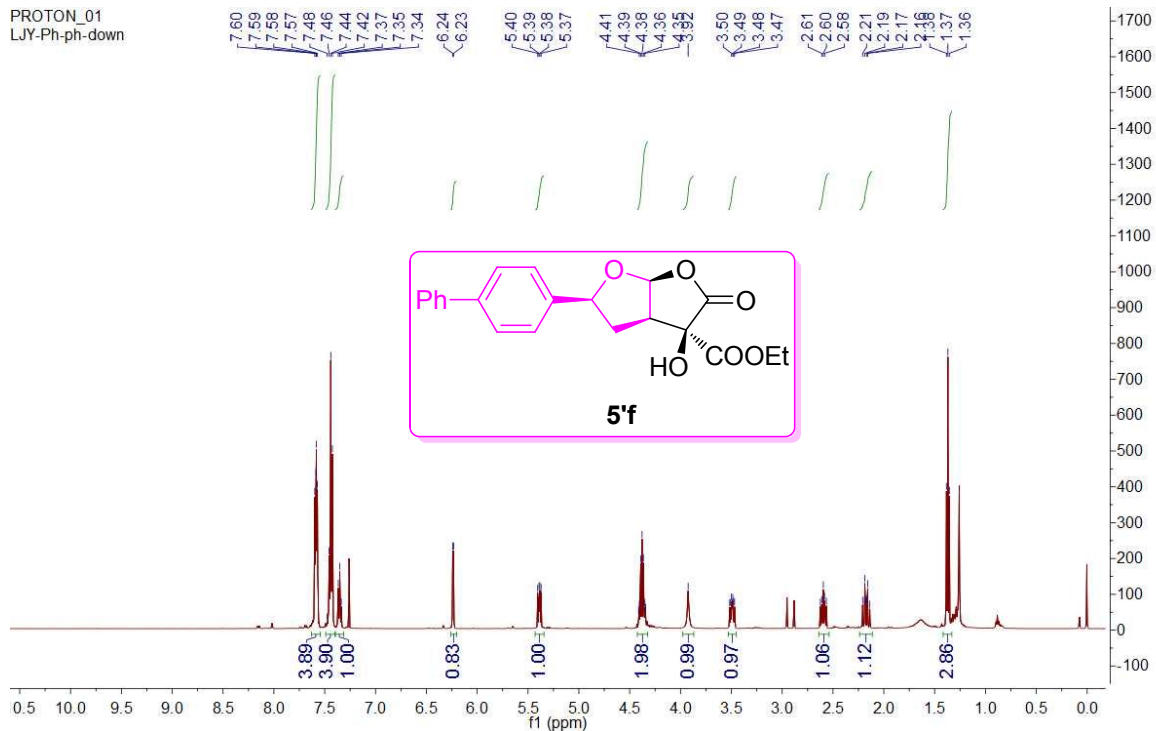

CARBON\_01  
LJY-Ph-ph-down

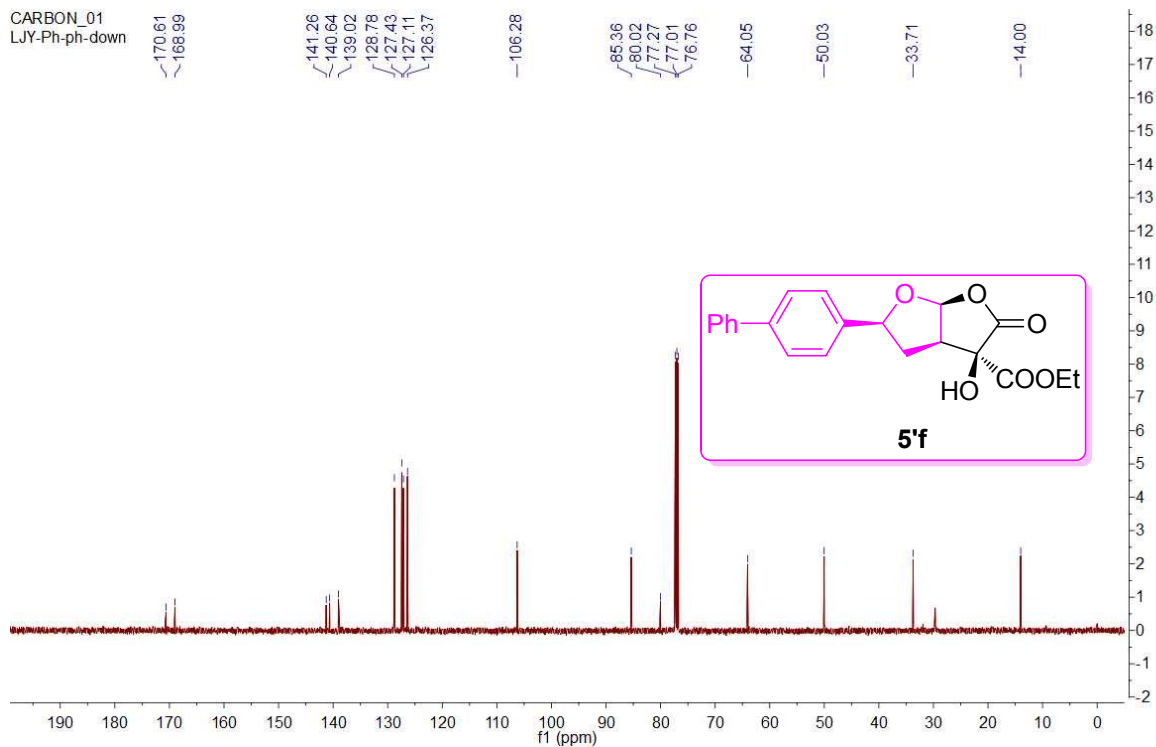

Chrom Type: Fixed WL Chromatogram, 210 nm

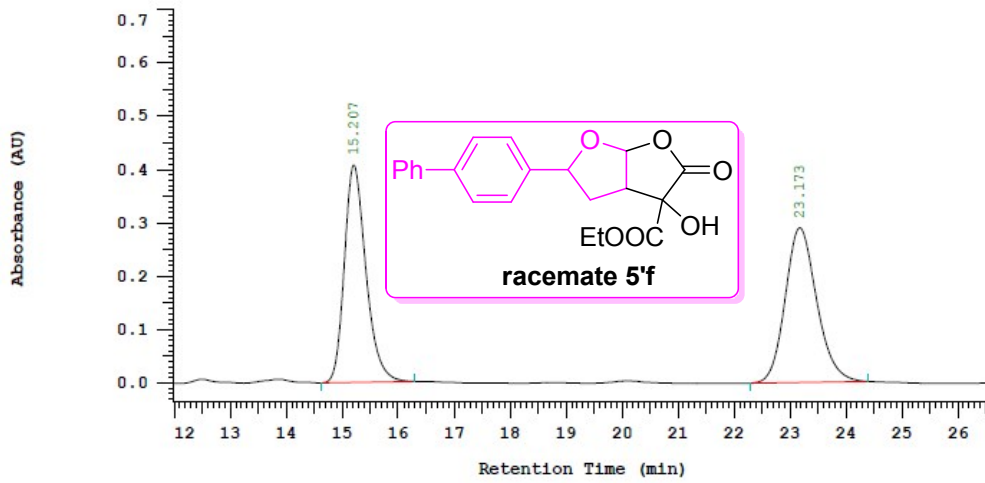

Chrom Type: Fixed WL Chromatogram, 210 nm

Peak Quantitation: AREA  
Calculation Method: AREA%

| No. | RT     | Area     | Area %  | BC |
|-----|--------|----------|---------|----|
| 1   | 15.207 | 5464139  | 49.091  | BB |
| 2   | 23.173 | 5666438  | 50.909  | BB |
|     |        | 11130577 | 100.000 |    |

Chrom Type: Fixed WL Chromatogram, 210 nm

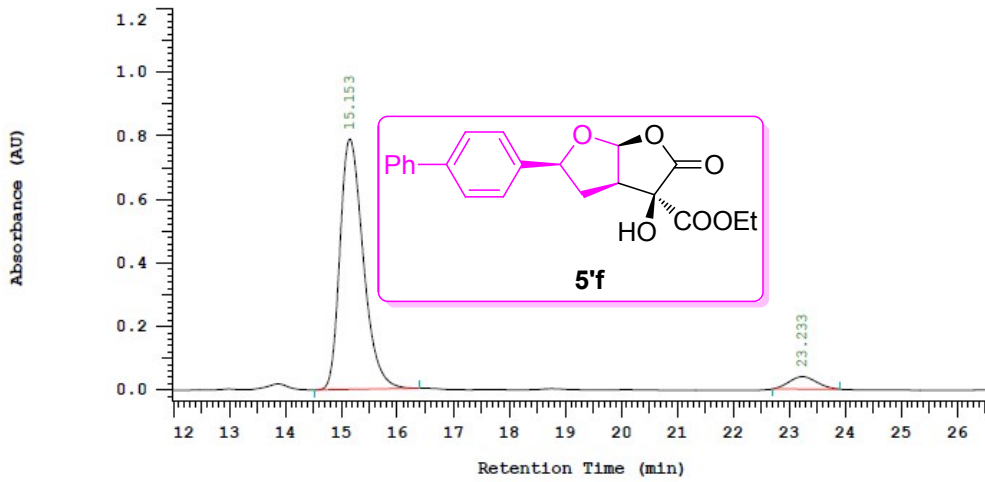

Chrom Type: Fixed WL Chromatogram, 210 nm

Peak Quantitation: AREA  
Calculation Method: AREA%

| No. | RT     | Area     | Area %  | BC |
|-----|--------|----------|---------|----|
| 1   | 15.153 | 11431783 | 94.457  | BB |
| 2   | 23.233 | 670907   | 5.543   | BB |
|     |        | 12102690 | 100.000 |    |



PROTON\_01  
LJY-NO2-up

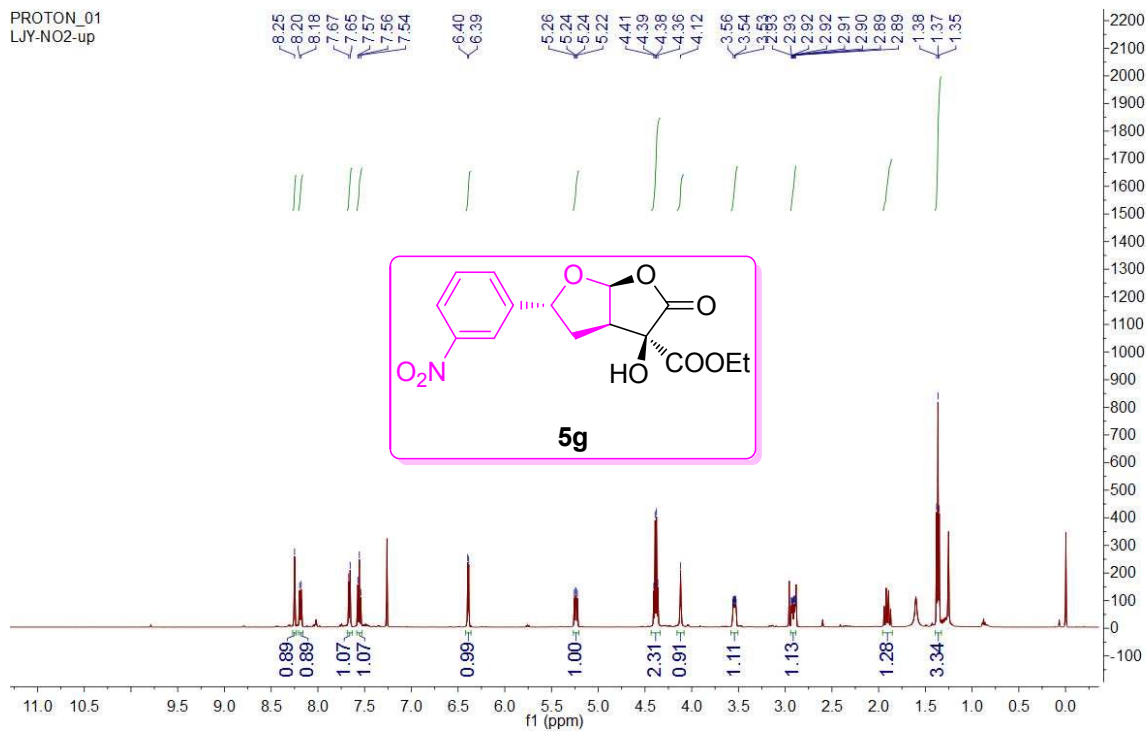

CARBON\_01  
LJY-NO2-up

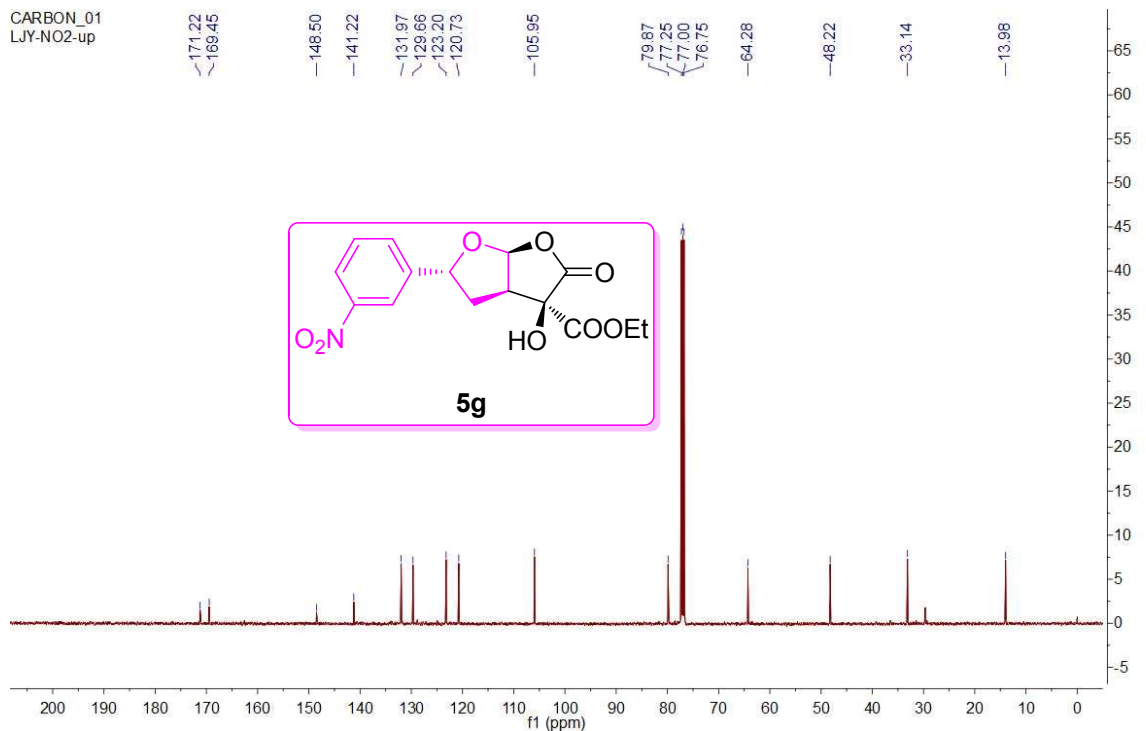

Chrom Type: Fixed WL Chromatogram, 210 nm

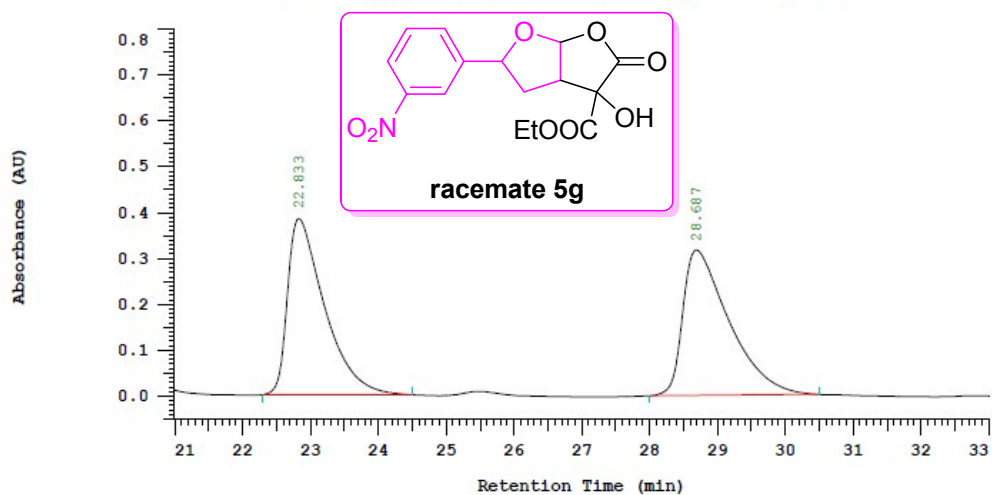

Chrom Type: Fixed WL Chromatogram, 210 nm

Peak Quantitation: AREA  
Calculation Method: AREA%

| No. | RT     | Area     | Area %  | BC |
|-----|--------|----------|---------|----|
| 1   | 22.833 | 7272795  | 49.279  | BB |
| 2   | 28.687 | 7485505  | 50.721  | BB |
|     |        | 14758300 | 100.000 |    |

Chrom Type: Fixed WL Chromatogram, 210 nm

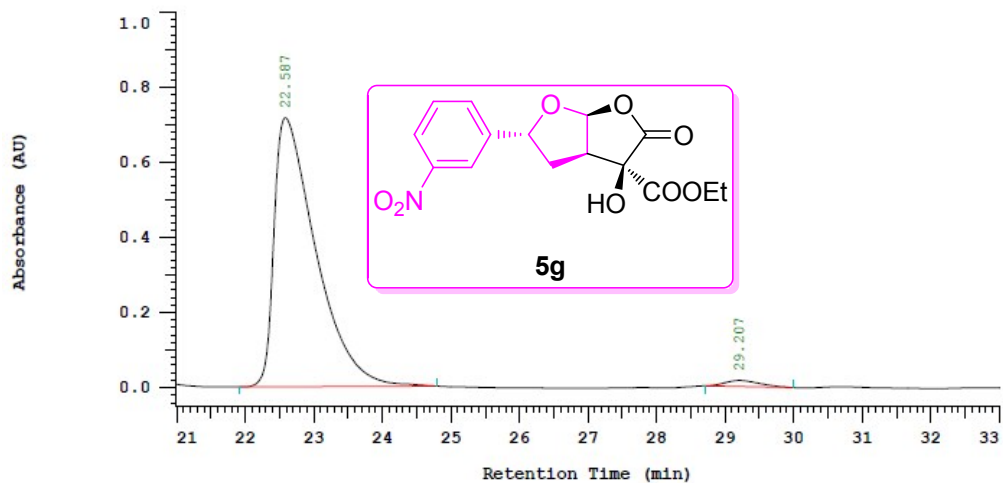

Chrom Type: Fixed WL Chromatogram, 210 nm

Peak Quantitation: AREA  
Calculation Method: AREA%

| No. | RT     | Area     | Area %  | BC |
|-----|--------|----------|---------|----|
| 1   | 22.587 | 15156526 | 98.145  | BB |
| 2   | 29.207 | 286518   | 1.855   | BB |
|     |        | 15443044 | 100.000 |    |

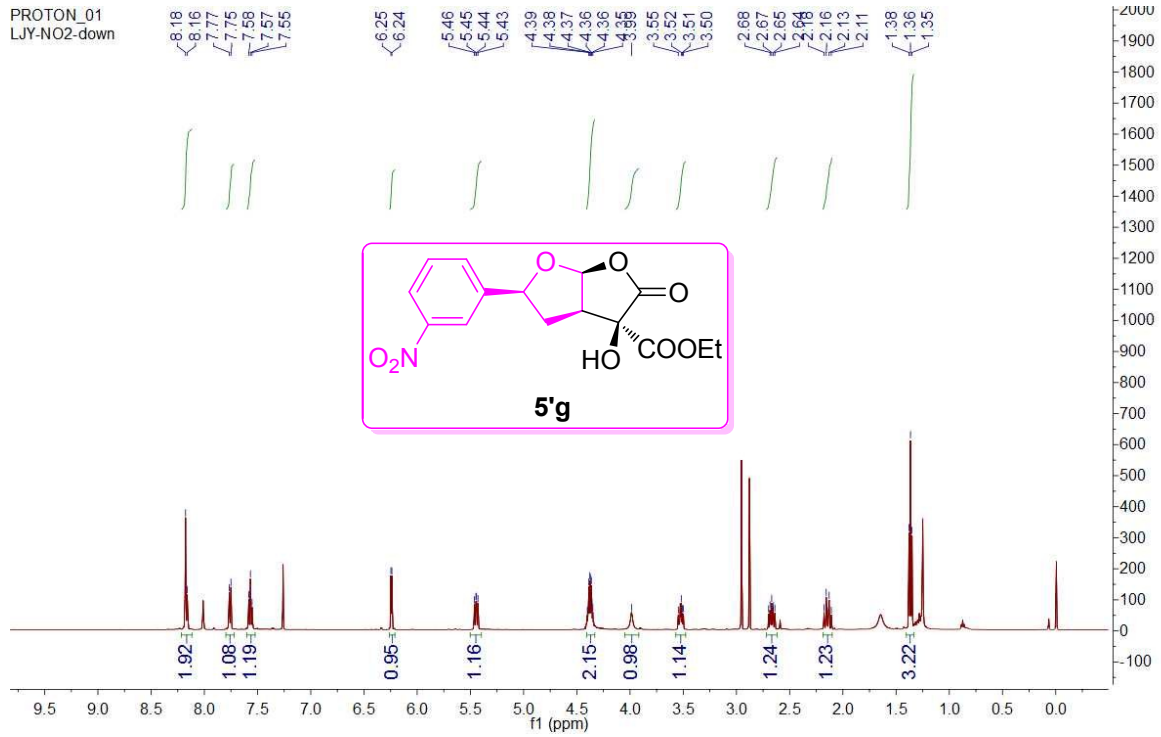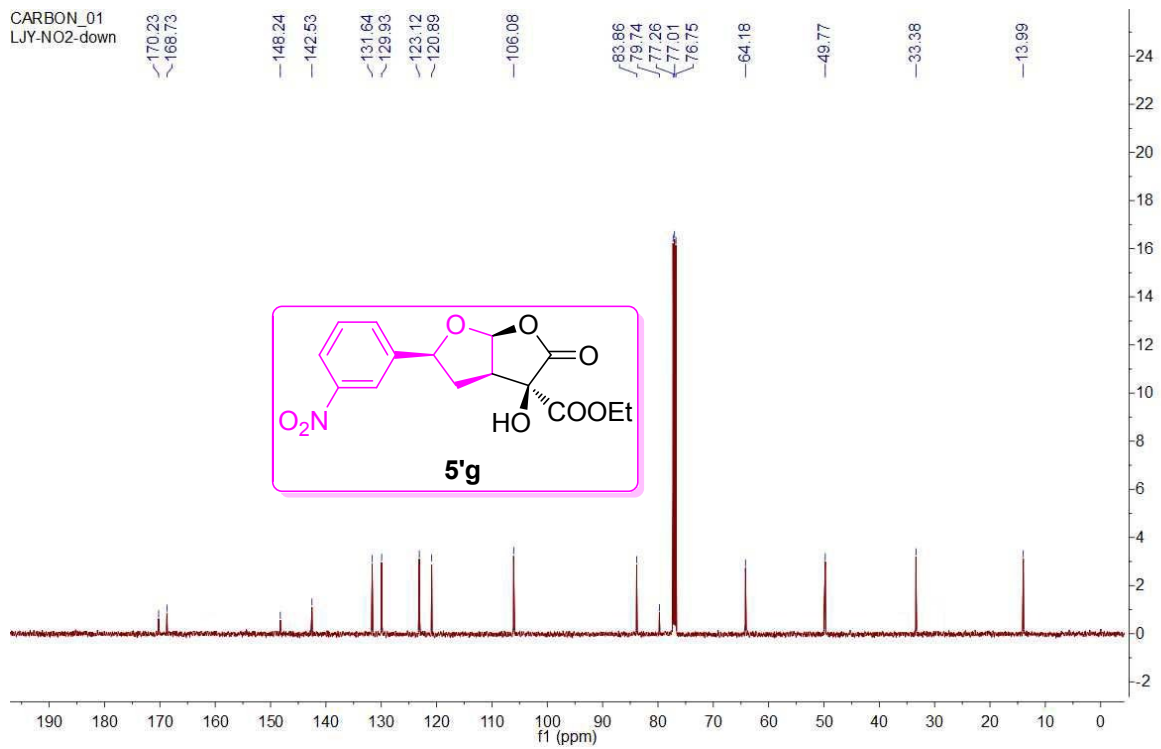

Chrom Type: Fixed WL Chromatogram, 210 nm

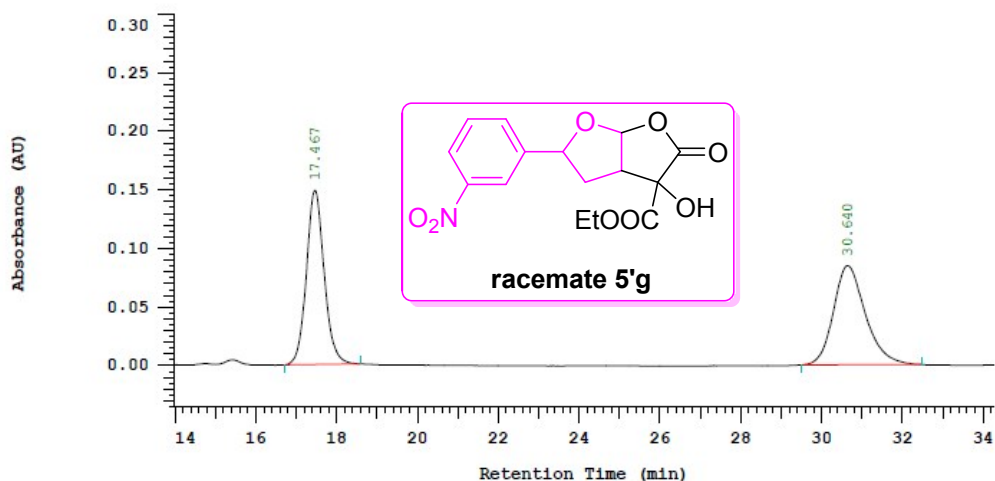

Chrom Type: Fixed WL Chromatogram, 210 nm

Peak Quantitation: AREA  
Calculation Method: AREA%

| No. | RT     | Area    | Area %  | BC |
|-----|--------|---------|---------|----|
| 1   | 17.467 | 2272576 | 49.450  | BB |
| 2   | 30.640 | 2323147 | 50.550  | BB |
|     |        | 4595723 | 100.000 |    |

Chrom Type: Fixed WL Chromatogram, 210 nm

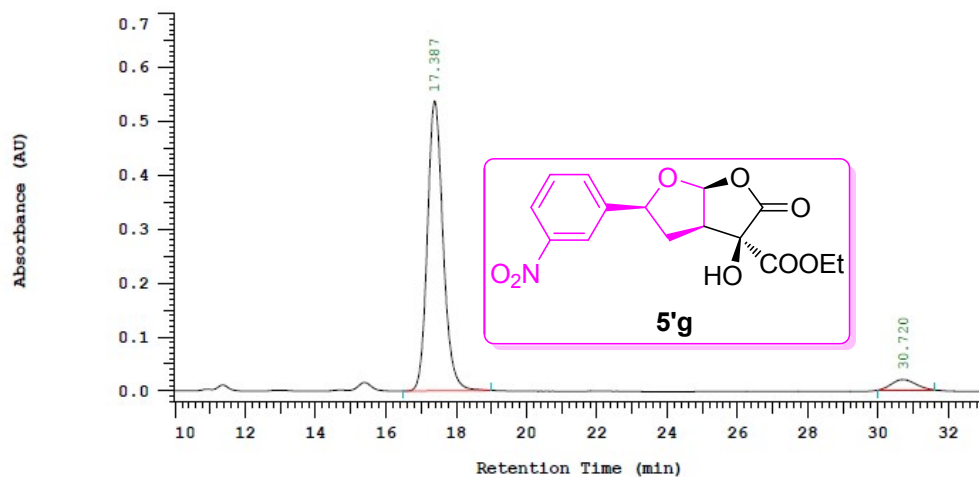

Chrom Type: Fixed WL Chromatogram, 210 nm

Peak Quantitation: AREA  
Calculation Method: AREA%

| No. | RT     | Area    | Area %  | BC |
|-----|--------|---------|---------|----|
| 1   | 17.387 | 8351667 | 94.779  | BB |
| 2   | 30.720 | 460081  | 5.221   | BB |
|     |        | 8811748 | 100.000 |    |

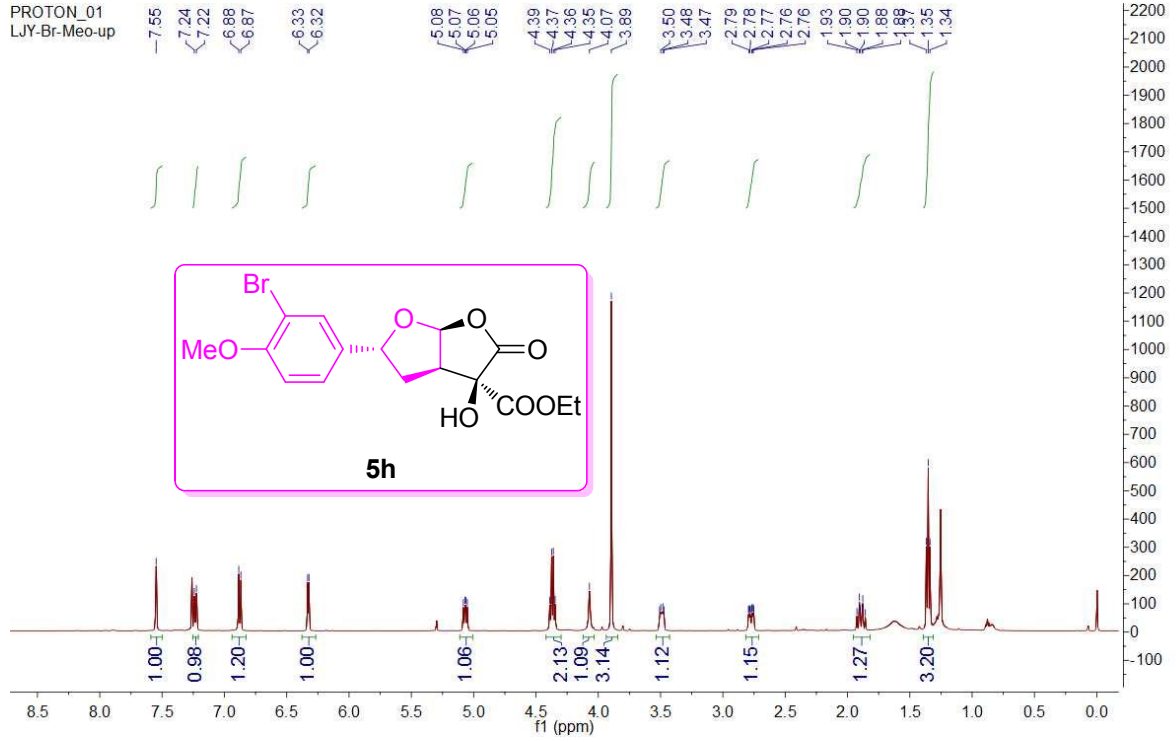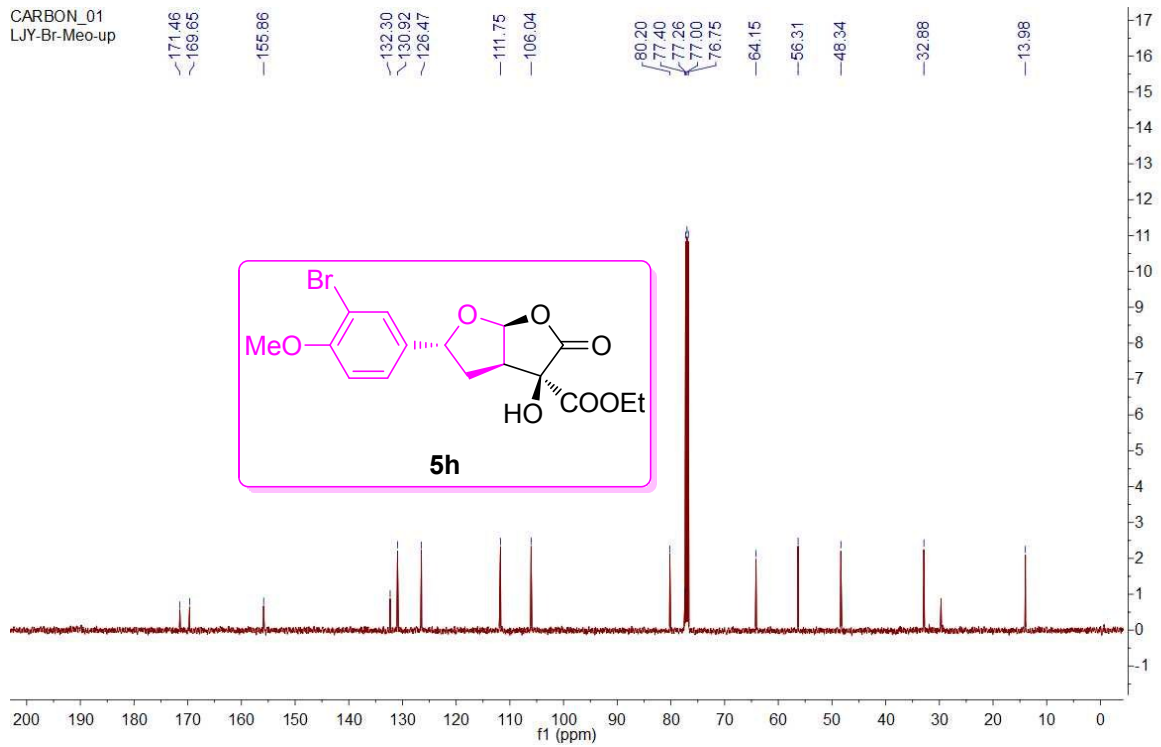

Chrom Type: Fixed WL Chromatogram, 210 nm

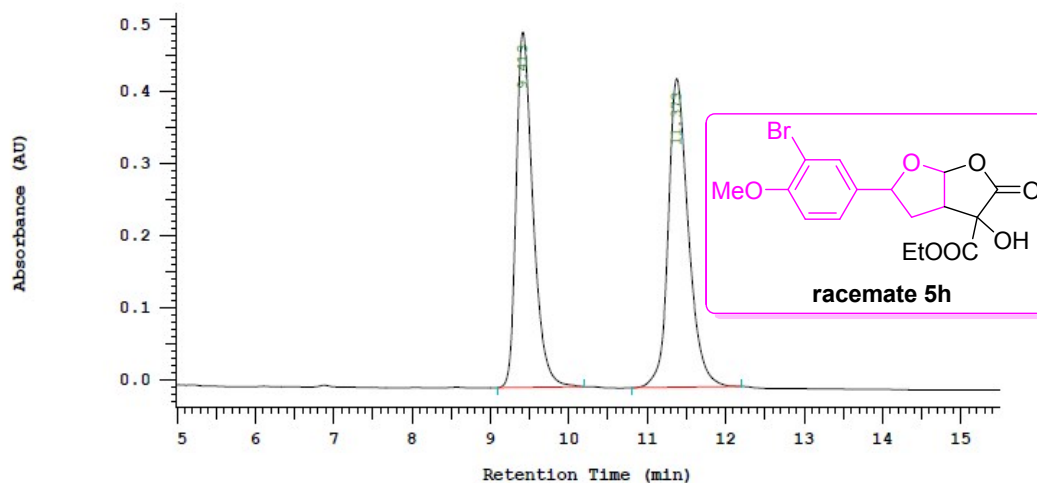

Chrom Type: Fixed WL Chromatogram, 210 nm

Peak Quantitation: AREA  
Calculation Method: AREA%

| No. | RT     | Area    | Area %  | BC |
|-----|--------|---------|---------|----|
| 1   | 9.413  | 3650086 | 48.835  | BB |
| 2   | 11.373 | 3824252 | 51.165  | BB |
|     |        | 7474338 | 100.000 |    |

Chrom Type: Fixed WL Chromatogram, 210 nm

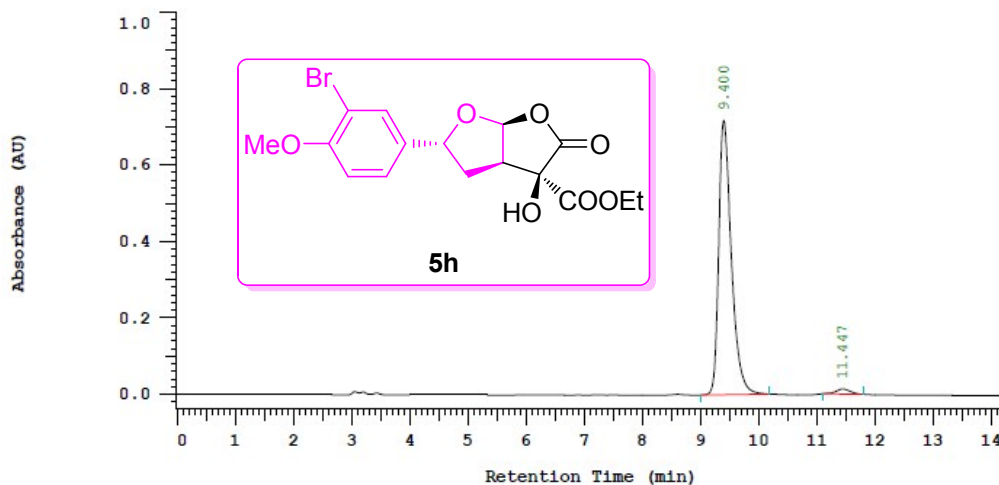

Chrom Type: Fixed WL Chromatogram, 210 nm

Peak Quantitation: AREA  
Calculation Method: AREA%

| No. | RT     | Area    | Area %  | BC |
|-----|--------|---------|---------|----|
| 1   | 9.400  | 5422723 | 97.985  | BB |
| 2   | 11.447 | 111522  | 2.015   | BB |
|     |        | 5534245 | 100.000 |    |

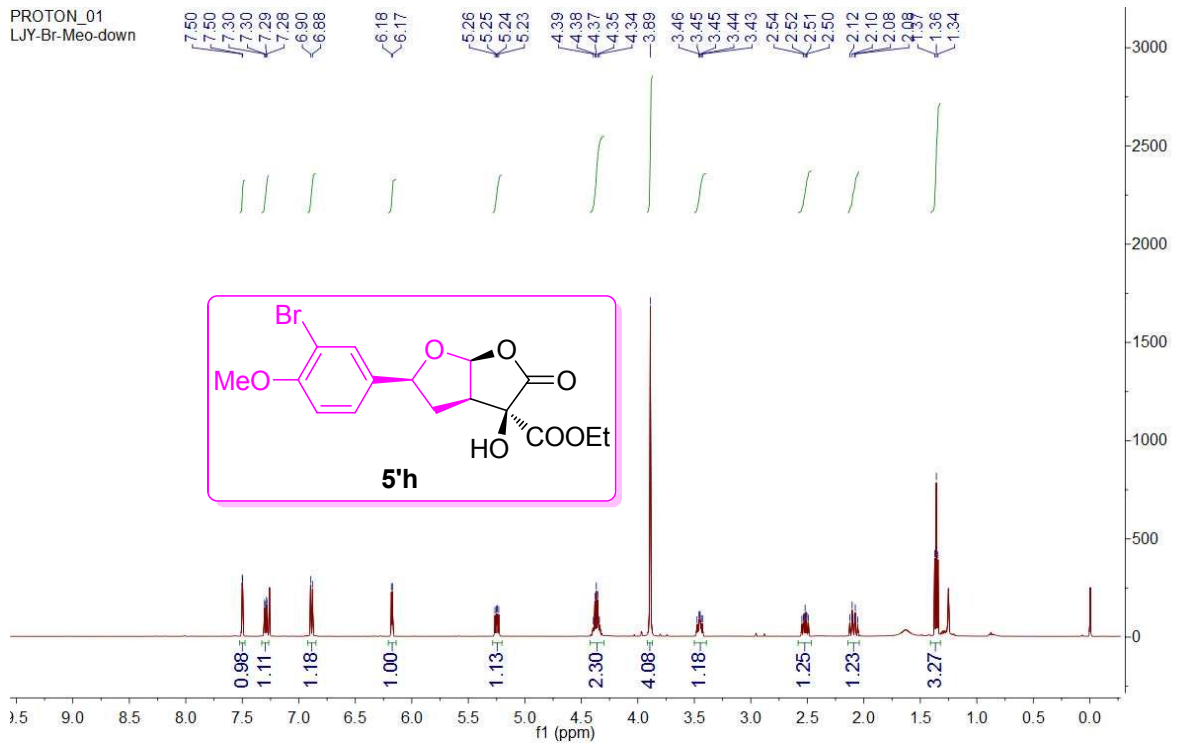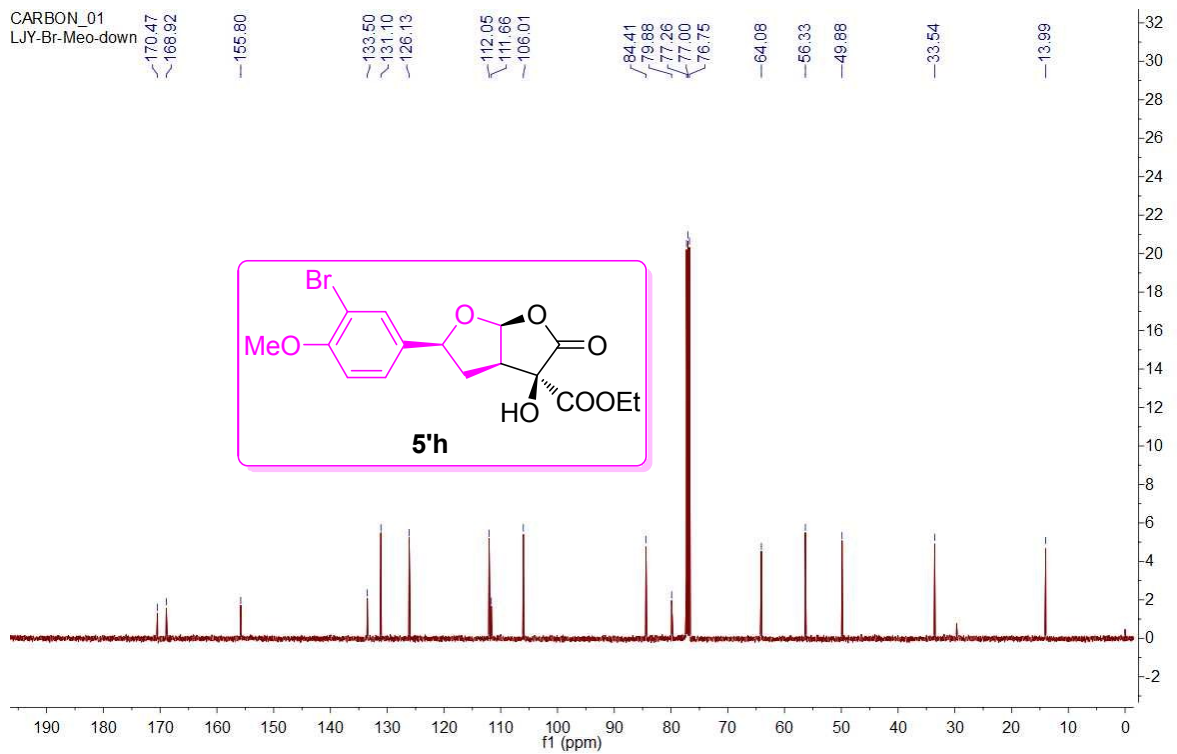

Chrom Type: Fixed WL Chromatogram, 210 nm

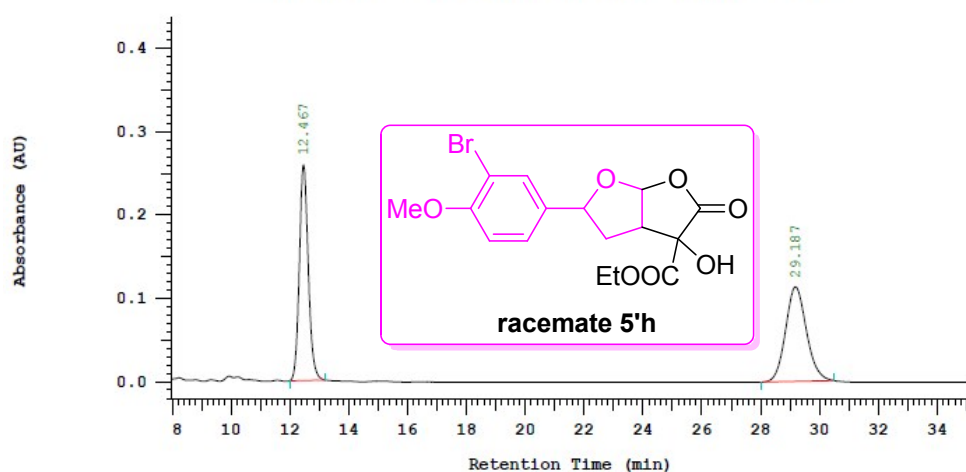

Chrom Type: Fixed WL Chromatogram, 210 nm

Peak Quantitation: AREA  
Calculation Method: AREA%

| No. | RT     | Area    | Area %  | BC |
|-----|--------|---------|---------|----|
| 1   | 12.467 | 2729667 | 49.414  | BB |
| 2   | 29.187 | 2794356 | 50.586  | BB |
|     |        | 5524023 | 100.000 |    |

Chrom Type: Fixed WL Chromatogram, 210 nm

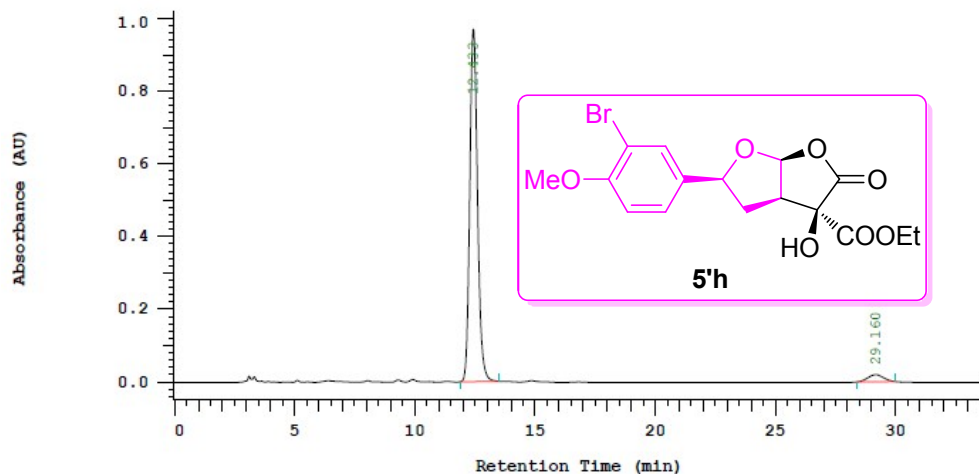

Chrom Type: Fixed WL Chromatogram, 210 nm

Peak Quantitation: AREA  
Calculation Method: AREA%

| No. | RT     | Area     | Area %  | BC |
|-----|--------|----------|---------|----|
| 1   | 12.433 | 10701449 | 96.084  | BB |
| 2   | 29.160 | 436147   | 3.916   | BB |
|     |        | 11137596 | 100.000 |    |



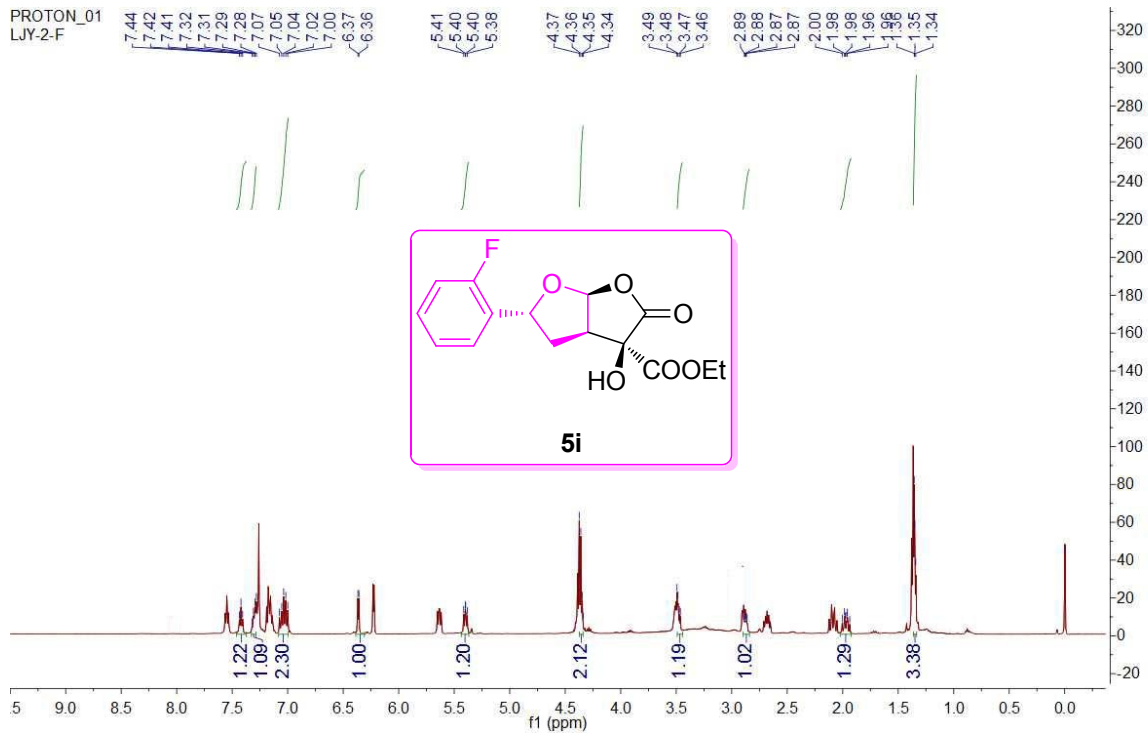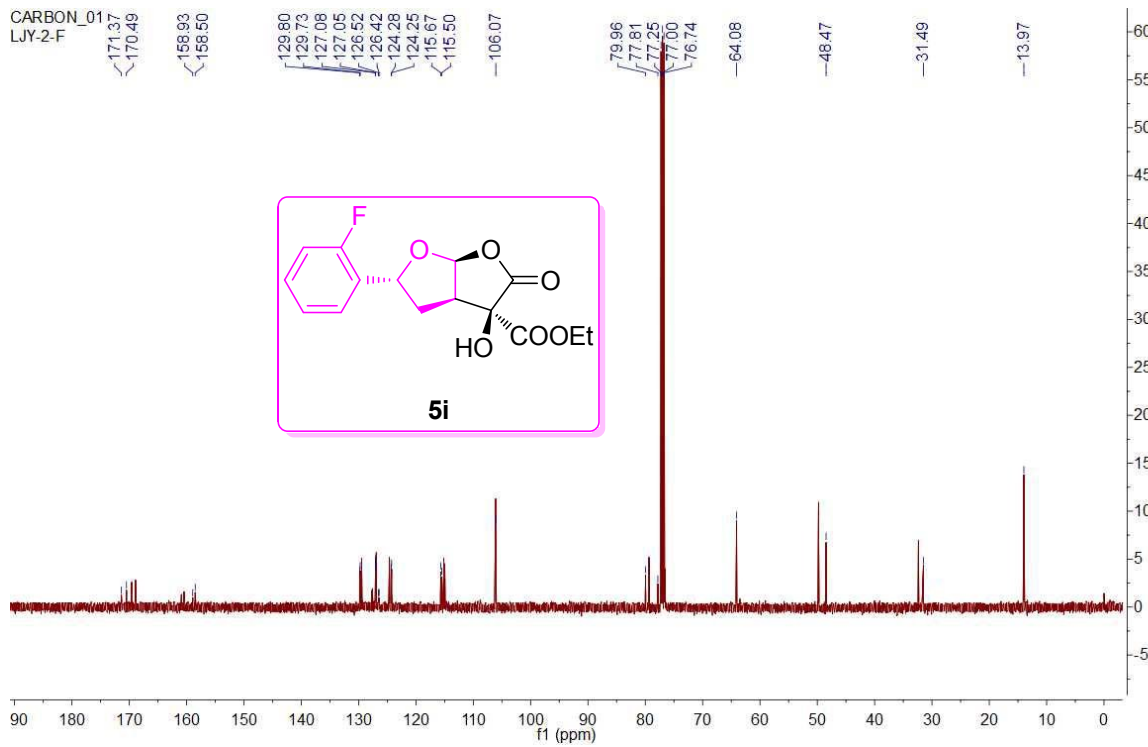

PROTON\_01  
LJY-2-F

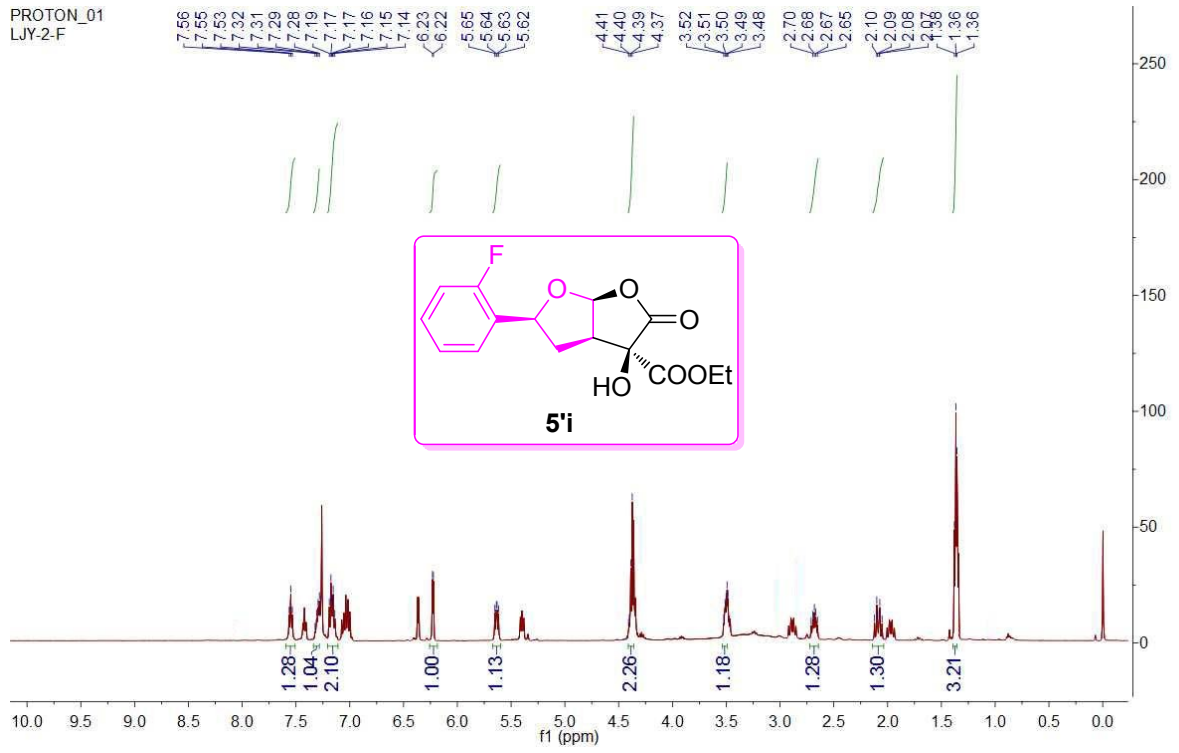

CARBON\_01  
LJY-2-F

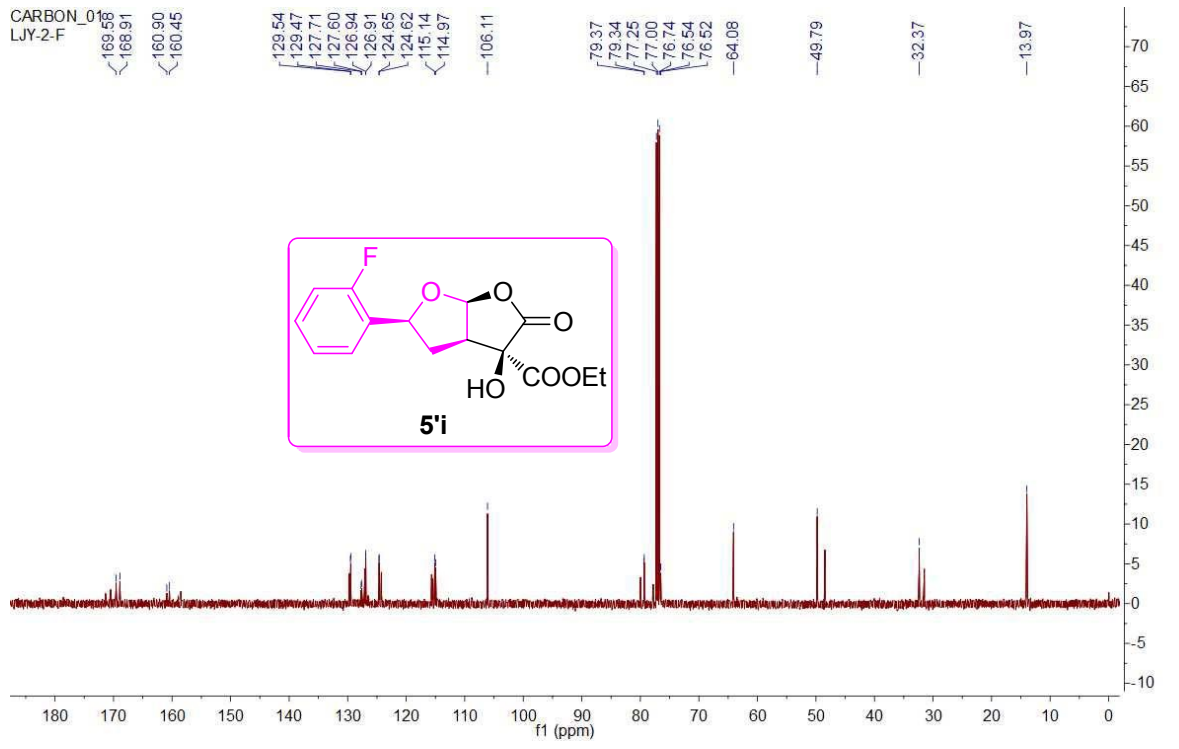

Chrom Type: Fixed WL Chromatogram, 210 nm

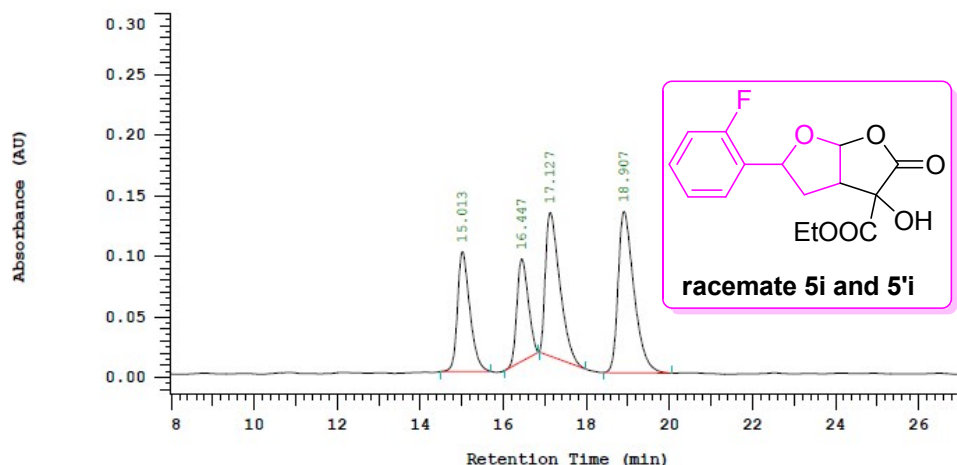

Chrom Type: Fixed WL Chromatogram, 210 nm

Peak Quantitation: AREA  
Calculation Method: AREA%

| No. | RT     | Area    | Area %  | BC |
|-----|--------|---------|---------|----|
| 1   | 15.013 | 1020620 | 20.323  | BB |
| 2   | 16.447 | 800844  | 15.947  | BB |
| 3   | 17.127 | 1432071 | 28.516  | BB |
| 4   | 18.907 | 1768395 | 35.213  | BB |
|     |        | 5021930 | 100.000 |    |

Chrom Type: Fixed WL Chromatogram, 210 nm

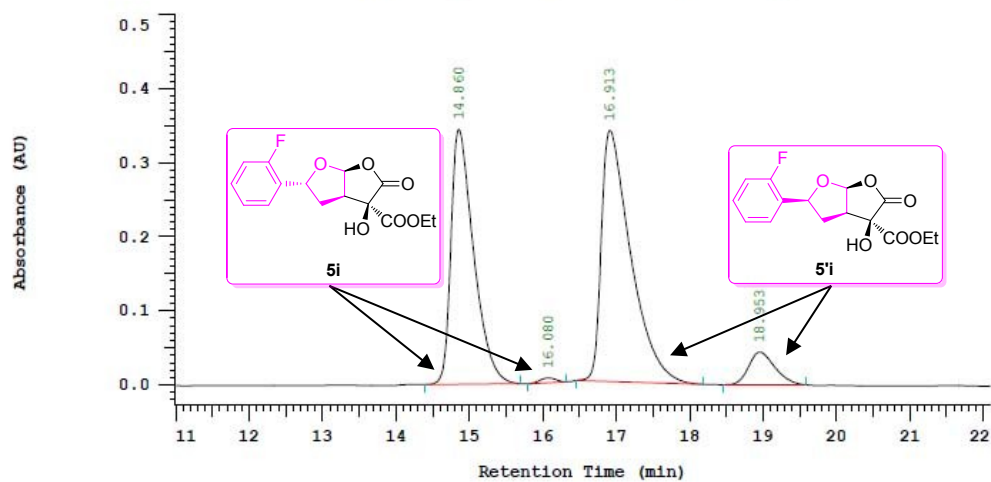

Chrom Type: Fixed WL Chromatogram, 210 nm

Peak Quantitation: AREA  
Calculation Method: AREA%

| No. | RT     | Area    | Area %  | BC |
|-----|--------|---------|---------|----|
| 1   | 14.860 | 3684739 | 42.681  | BB |
| 2   | 16.080 | 47227   | 0.547   | BB |
| 3   | 16.913 | 4693643 | 54.368  | BB |
| 4   | 18.953 | 207509  | 2.404   | BB |
|     |        | 8633118 | 100.000 |    |

PROTON\_01  
LJY-2-Cl

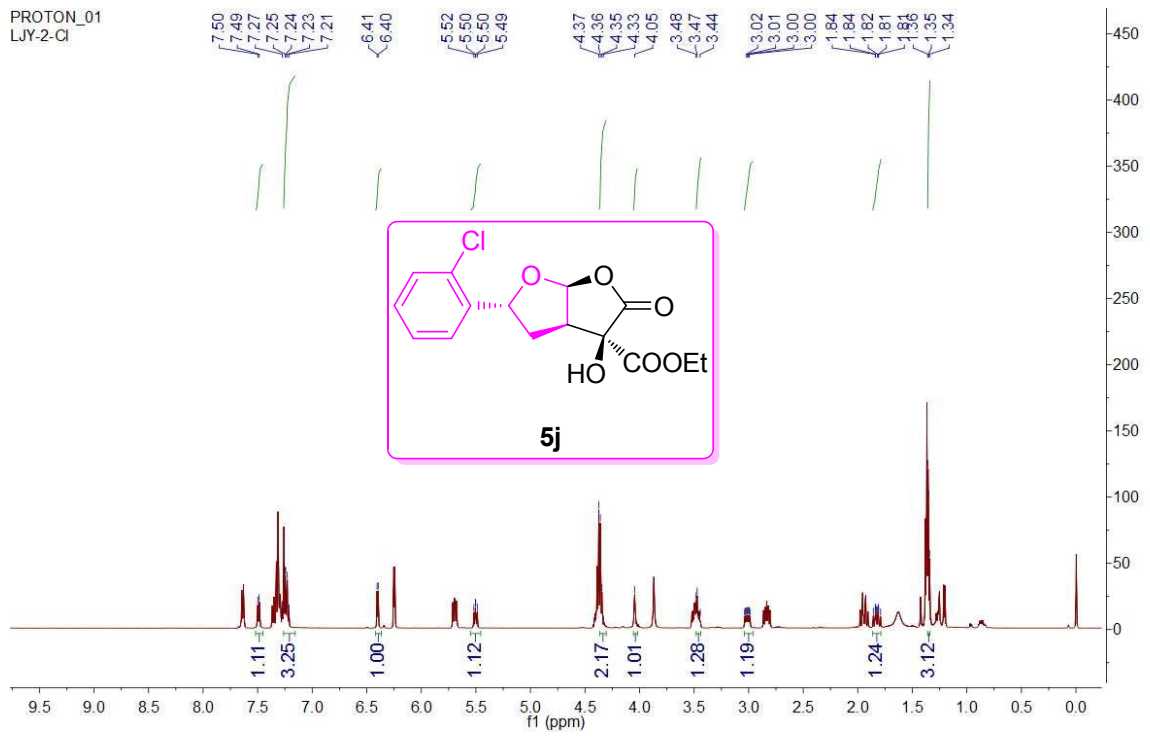

CARBON\_01  
LJY-2-Cl

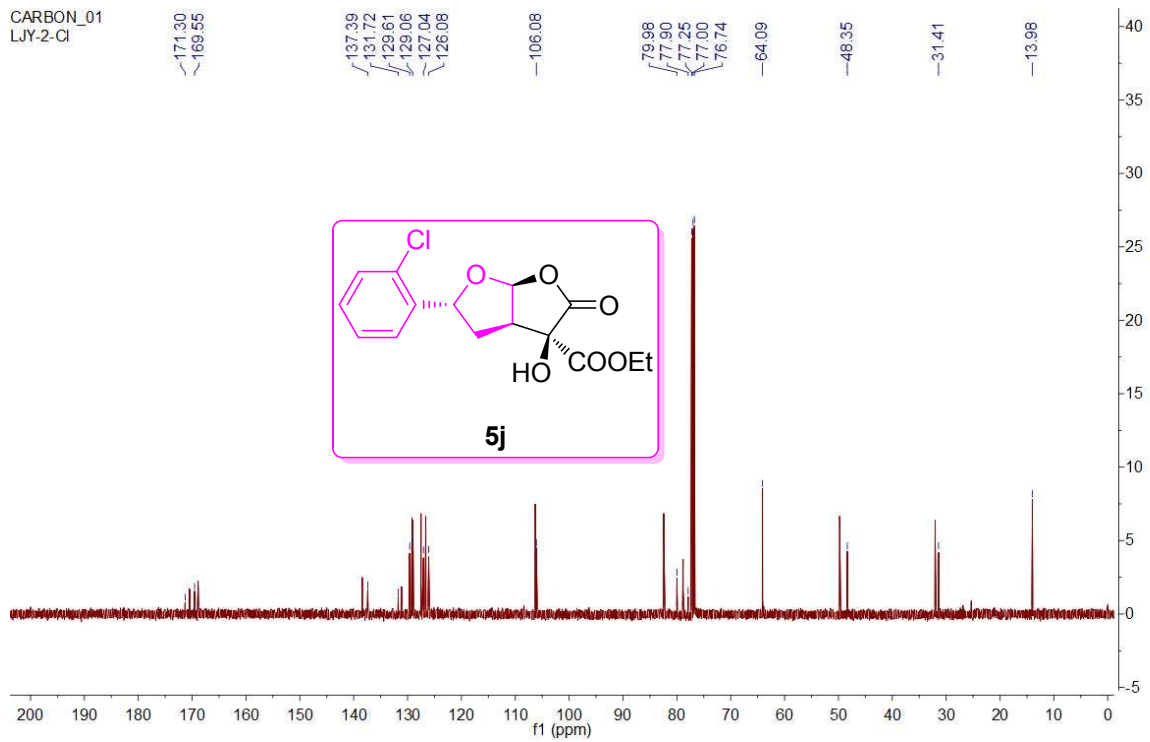

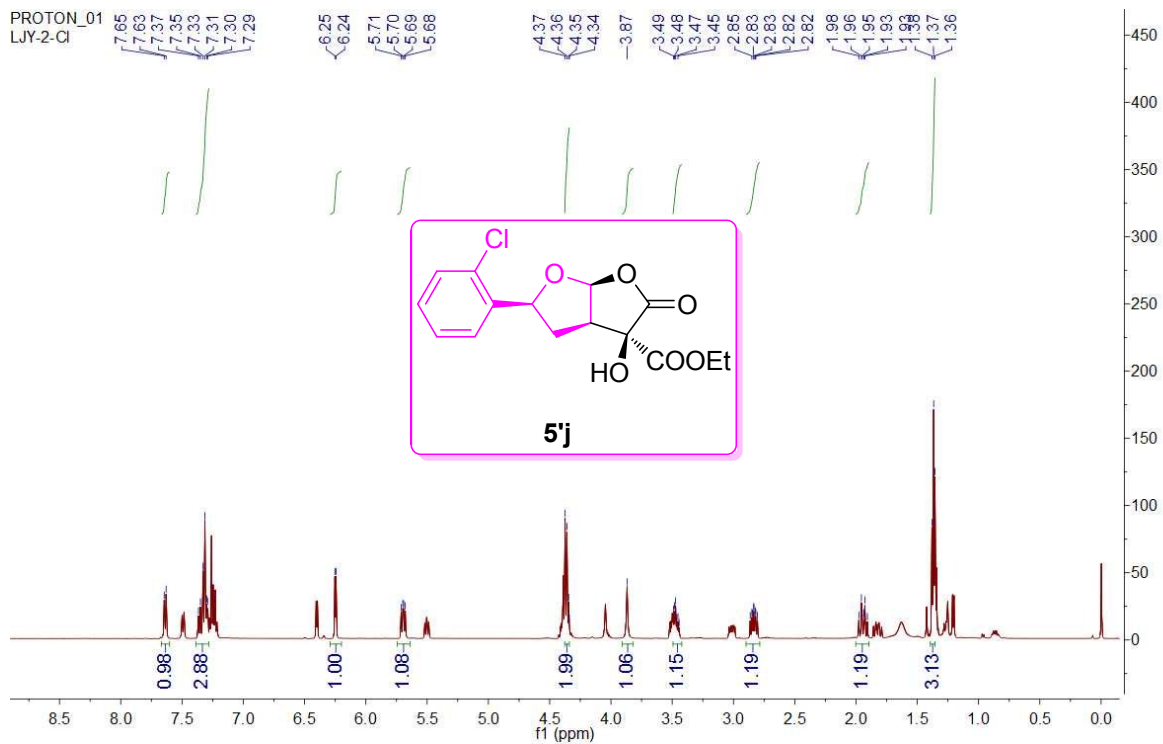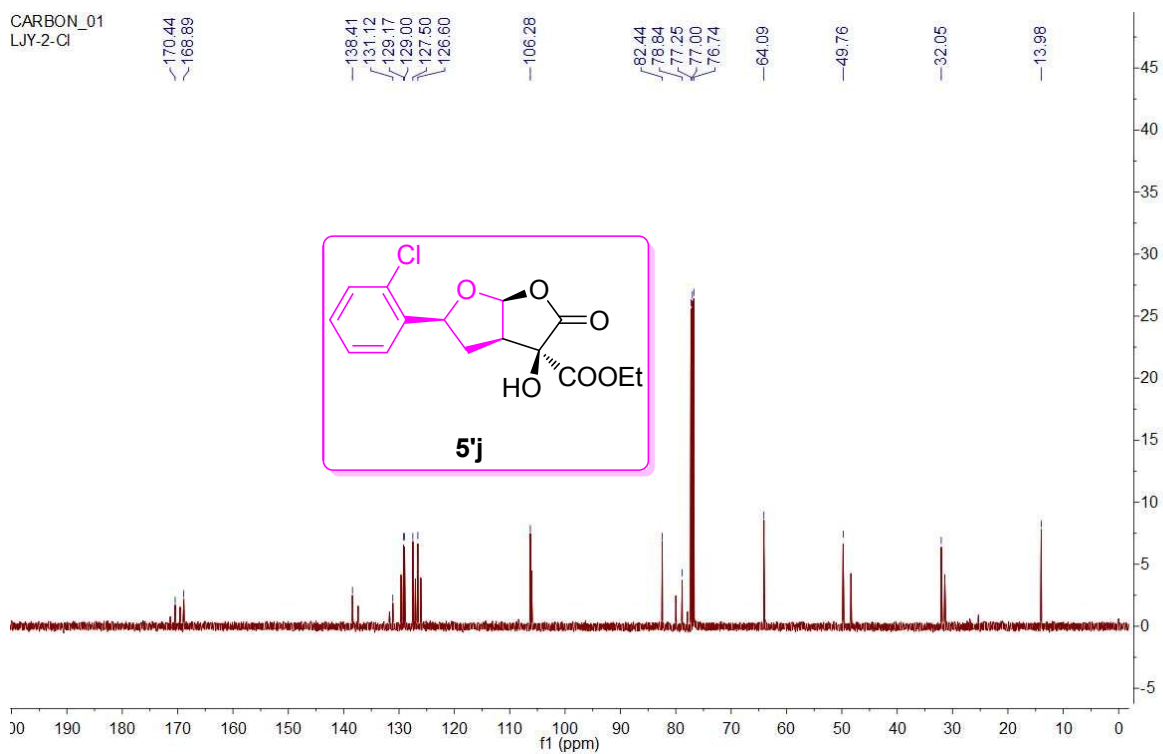

Chrom Type: Fixed WL Chromatogram, 231 nm

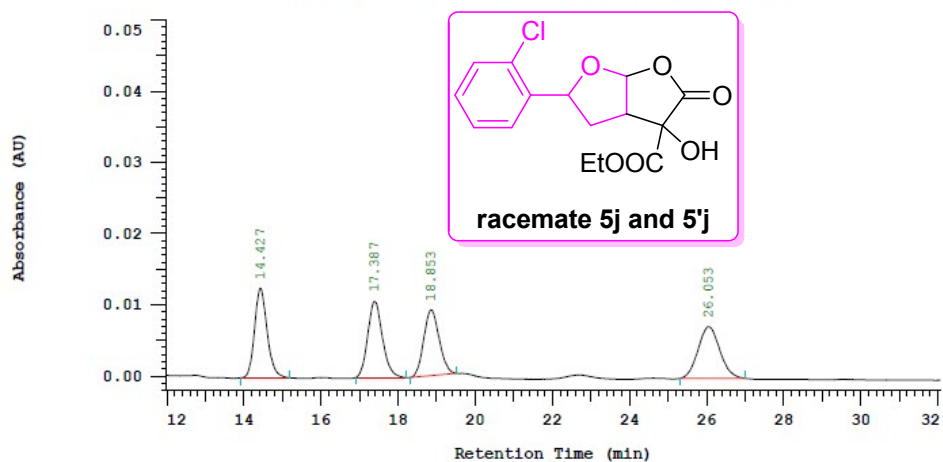

Chrom Type: Fixed WL Chromatogram, 231 nm

Peak Quantitation: AREA  
Calculation Method: AREA%

| No. | RT     | Area   | Area %  | BC |
|-----|--------|--------|---------|----|
| 1   | 14.427 | 142500 | 25.634  | BB |
| 2   | 17.387 | 142696 | 25.669  | BB |
| 3   | 18.853 | 128099 | 23.044  | BB |
| 4   | 26.053 | 142604 | 25.653  | BB |
|     |        | 555899 | 100.000 |    |

Chrom Type: Fixed WL Chromatogram, 231 nm

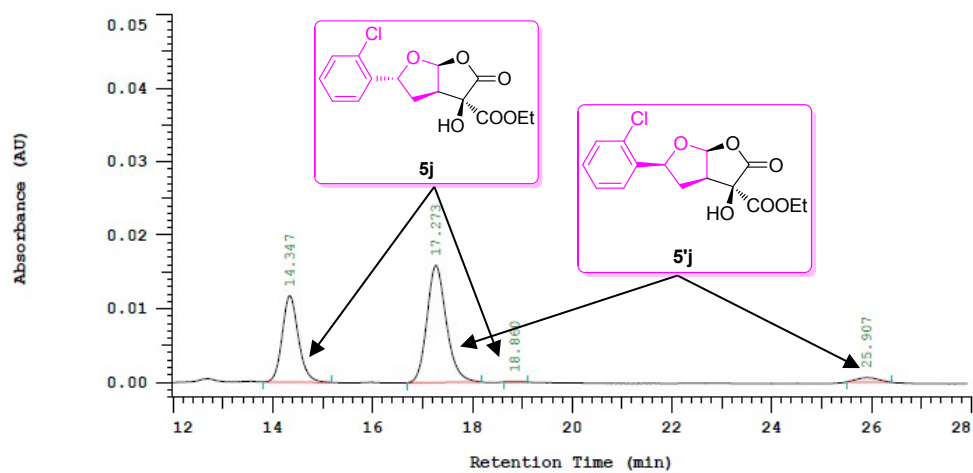

Chrom Type: Fixed WL Chromatogram, 231 nm

Peak Quantitation: AREA  
Calculation Method: AREA%

| No. | RT     | Area   | Area %  | BC |
|-----|--------|--------|---------|----|
| 1   | 14.347 | 132951 | 37.074  | BB |
| 2   | 17.273 | 215910 | 60.208  | BB |
| 3   | 18.860 | 623    | 0.174   | BB |
| 4   | 25.907 | 9125   | 2.545   | BB |
|     |        | 358609 | 100.000 |    |

PROTON\_01  
LJY-O-up

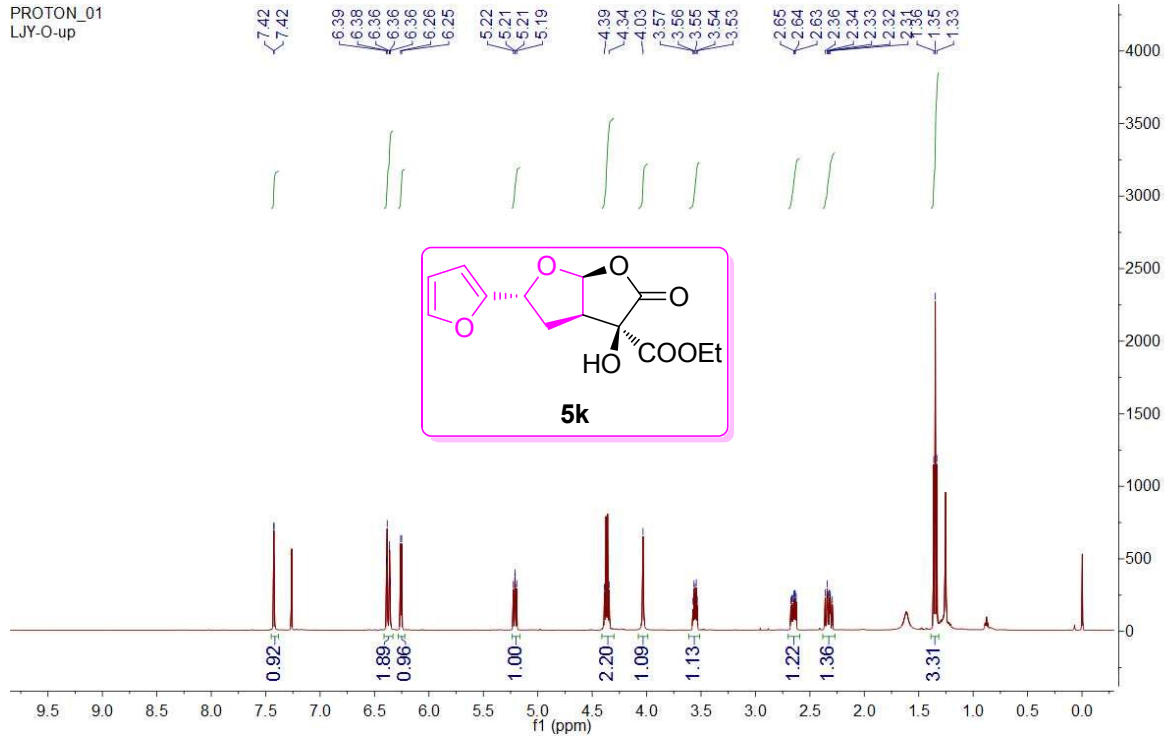

CARBON\_01  
LJY-O-up

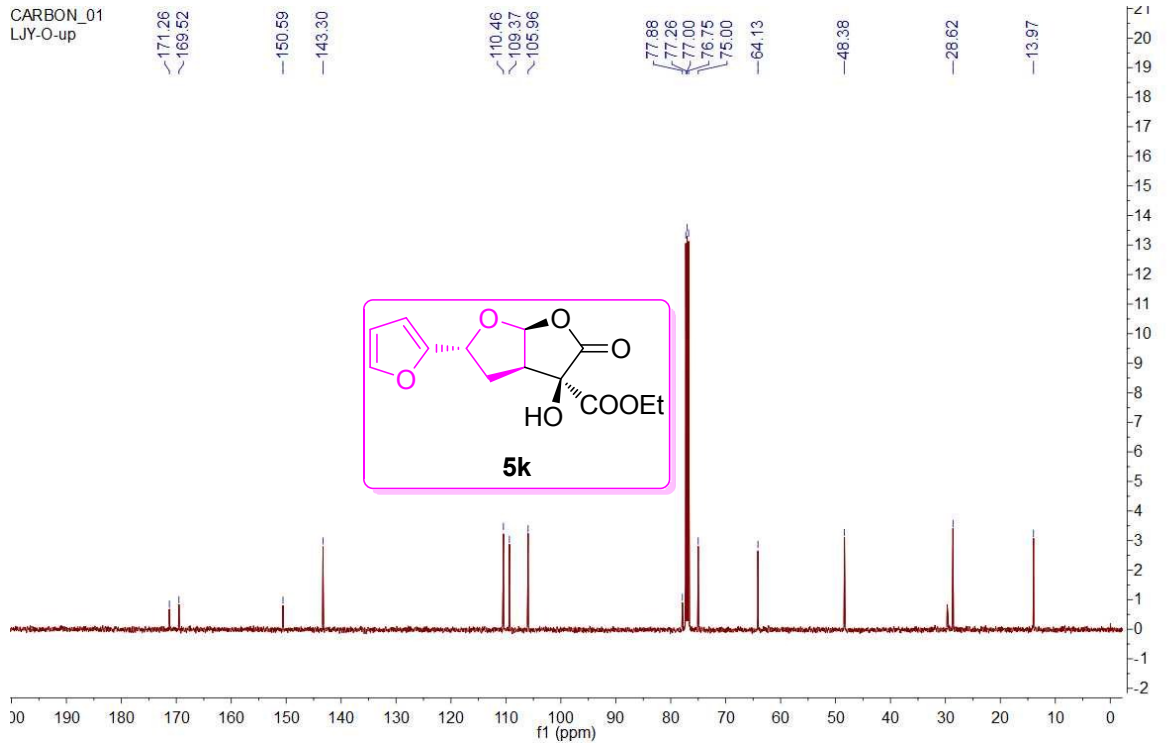

Chrom Type: Fixed WL Chromatogram, 210 nm

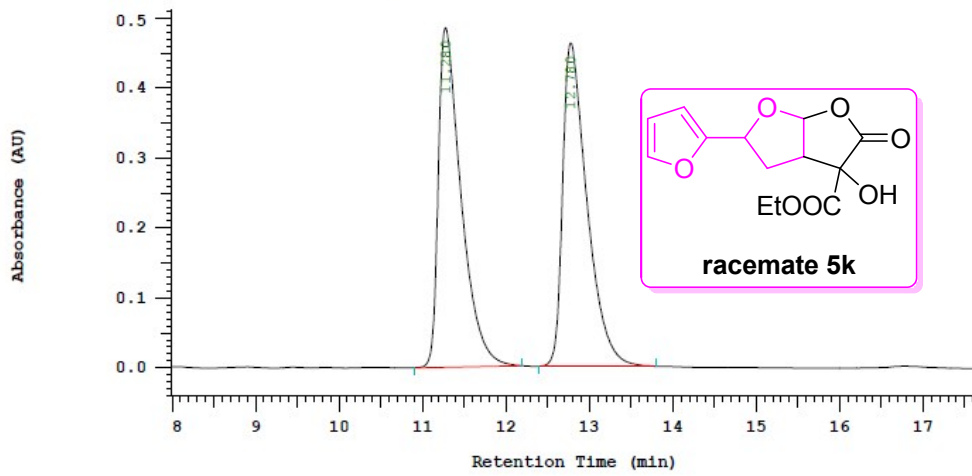

Chrom Type: Fixed WL Chromatogram, 210 nm

Peak Quantitation: AREA  
Calculation Method: AREA%

| No. | RT     | Area    | Area %  | BC |
|-----|--------|---------|---------|----|
| 1   | 11.280 | 4605844 | 49.480  | BB |
| 2   | 12.780 | 4702667 | 50.520  | BB |
|     |        | 9308511 | 100.000 |    |

Chrom Type: Fixed WL Chromatogram, 210 nm

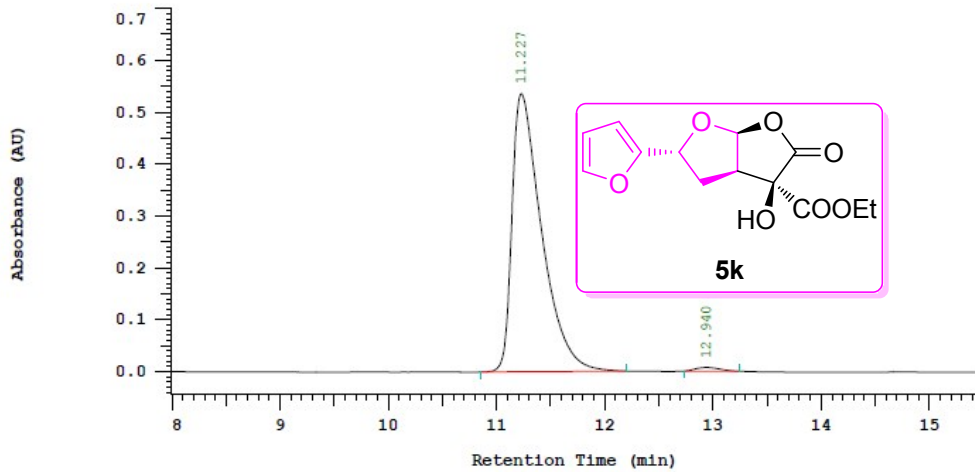

Chrom Type: Fixed WL Chromatogram, 210 nm

Peak Quantitation: AREA  
Calculation Method: AREA%

| No. | RT     | Area    | Area %  | BC |
|-----|--------|---------|---------|----|
| 1   | 11.227 | 5103152 | 98.949  | BB |
| 2   | 12.940 | 54181   | 1.051   | BB |
|     |        | 5157333 | 100.000 |    |



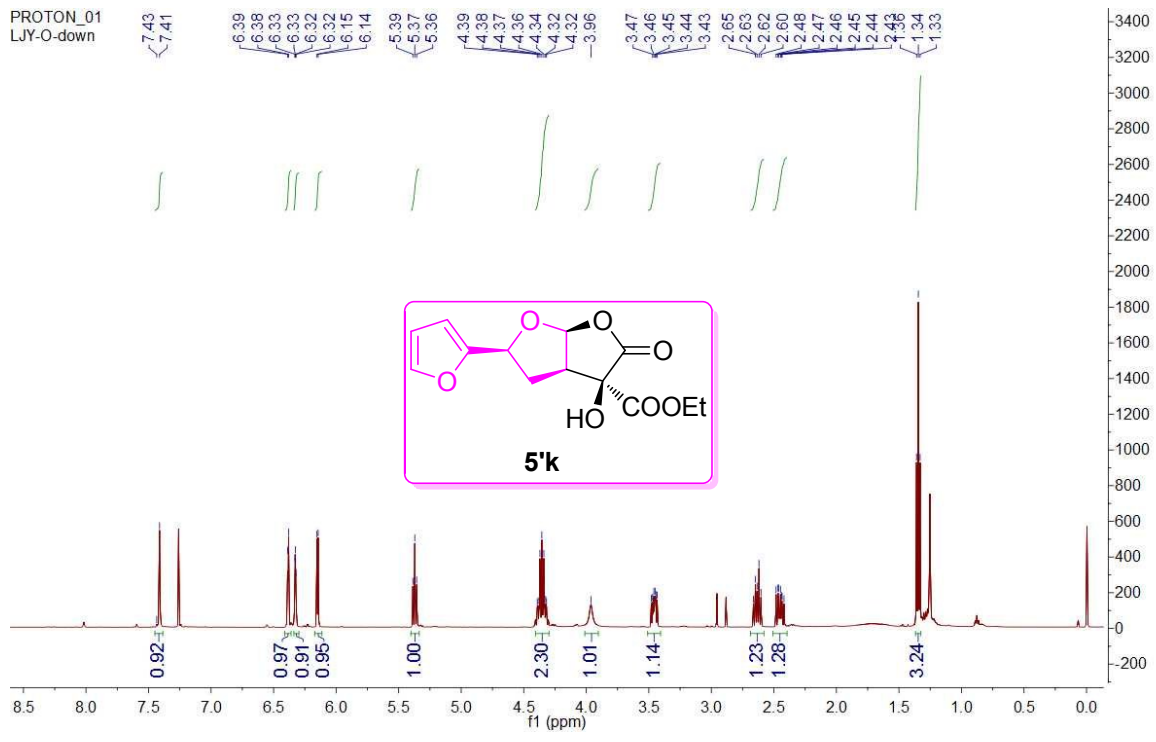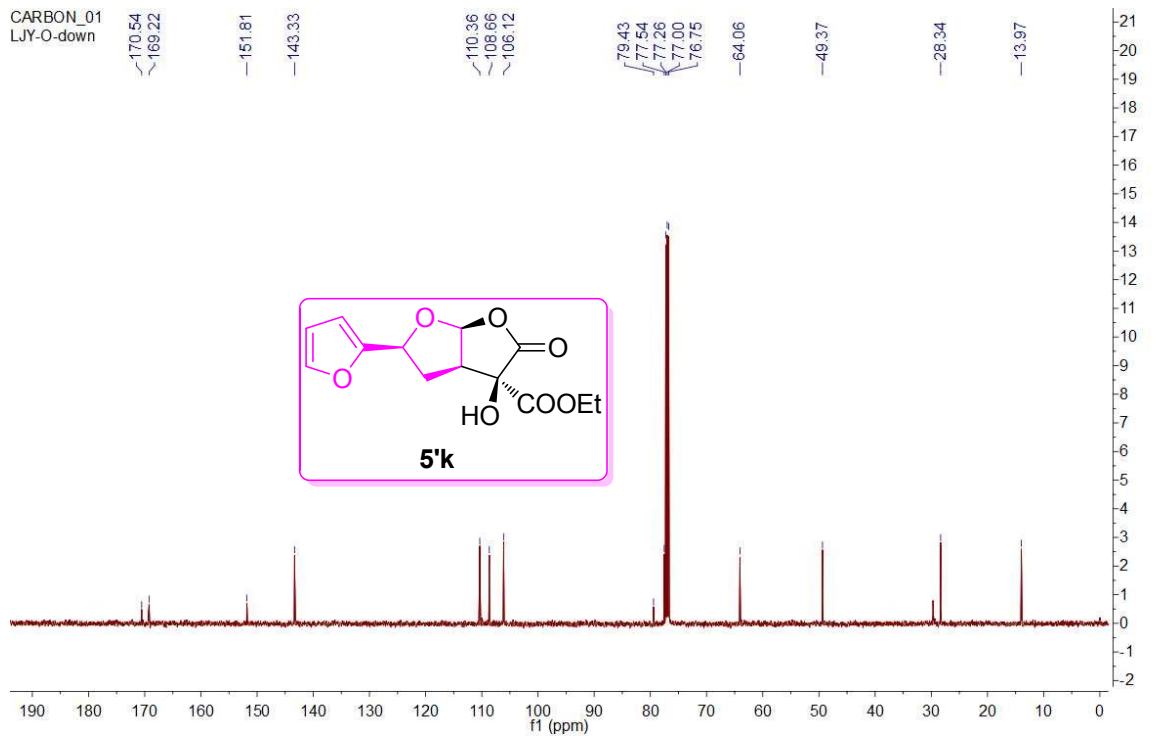

Chrom Type: Fixed WL Chromatogram, 210 nm

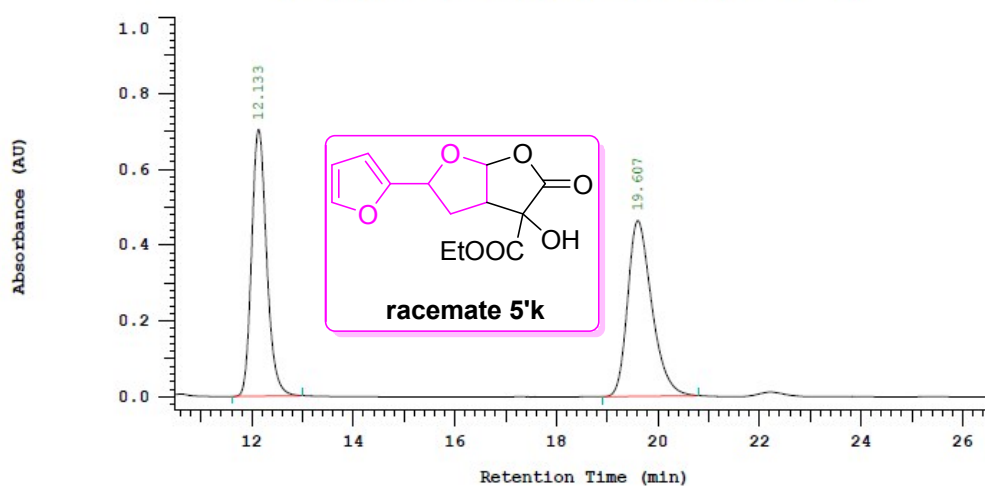

Chrom Type: Fixed WL Chromatogram, 210 nm

Peak Quantitation: AREA  
Calculation Method: AREA%

| No. | RT     | Area     | Area %  | BC |
|-----|--------|----------|---------|----|
| 1   | 12.133 | 7255588  | 48.600  | BB |
| 2   | 19.607 | 7673651  | 51.400  | BB |
|     |        | 14929239 | 100.000 |    |

Chrom Type: Fixed WL Chromatogram, 210 nm

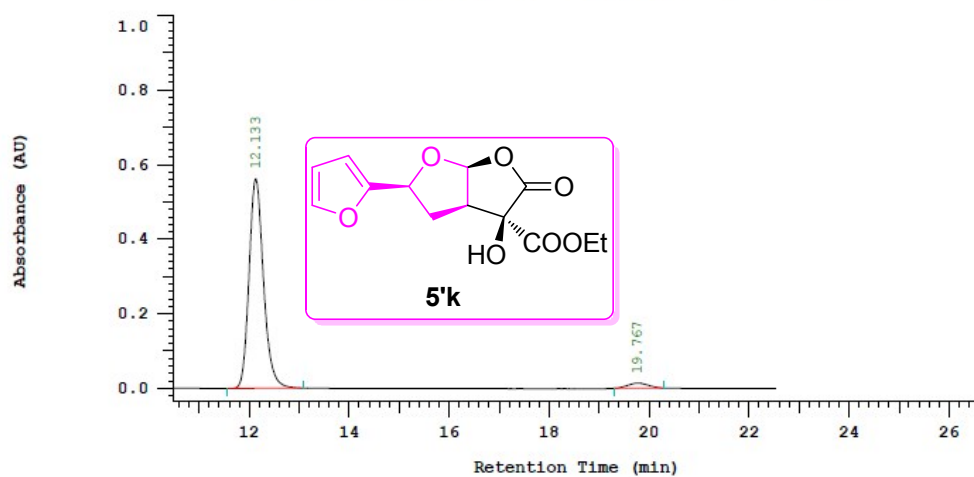

Chrom Type: Fixed WL Chromatogram, 210 nm

Peak Quantitation: AREA  
Calculation Method: AREA%

| No. | RT     | Area    | Area %  | BC |
|-----|--------|---------|---------|----|
| 1   | 12.133 | 5671060 | 96.728  | BB |
| 2   | 19.767 | 191856  | 3.272   | BB |
|     |        | 5862916 | 100.000 |    |

PROTON\_01  
LJY-S-up

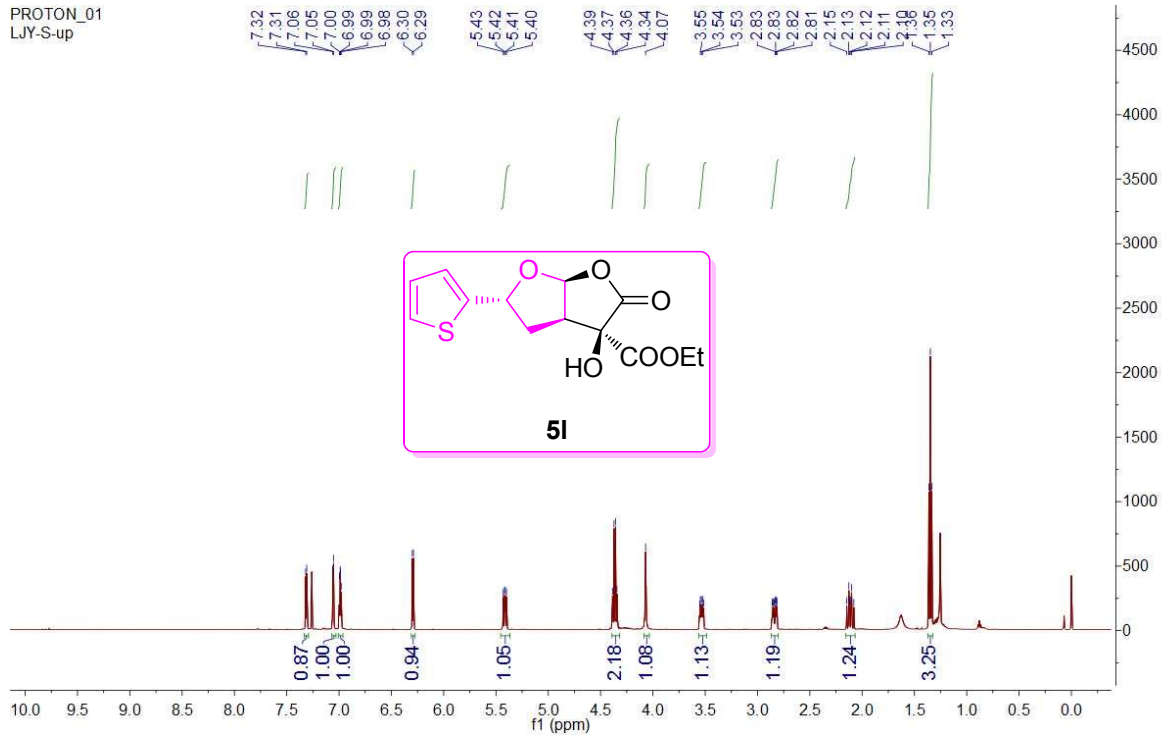

CARBON\_01  
LJY-S-up

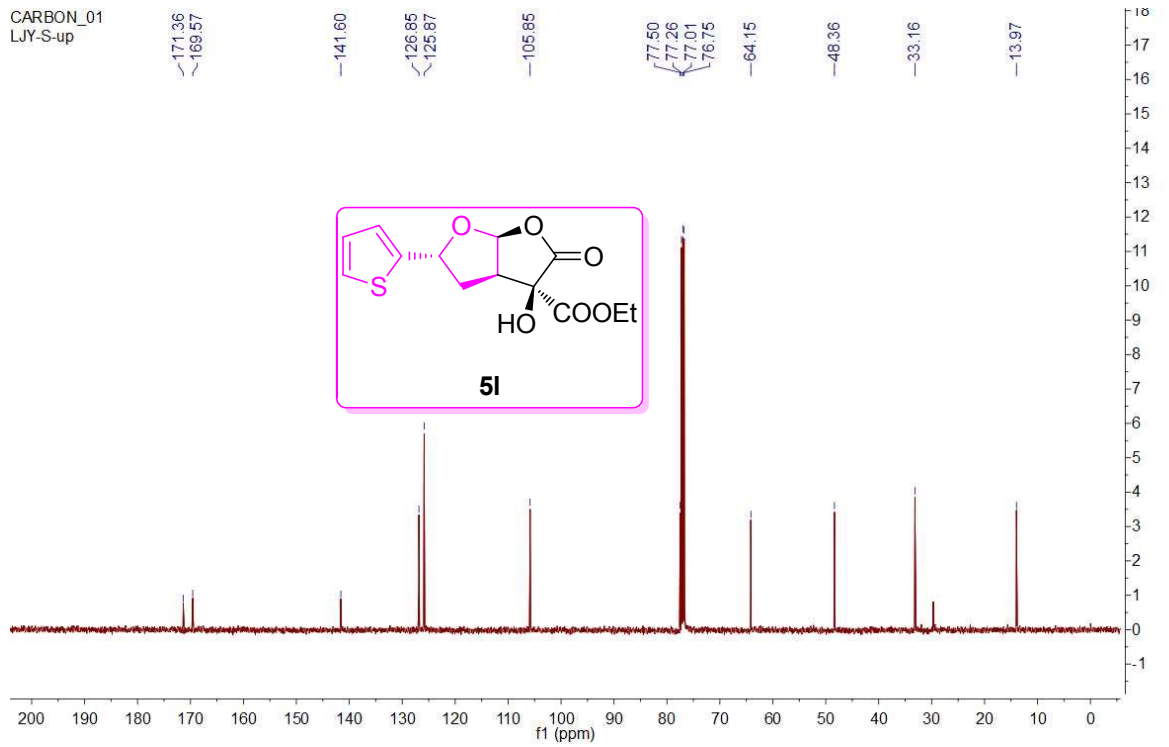

Chrom Type: Fixed WL Chromatogram, 210 nm

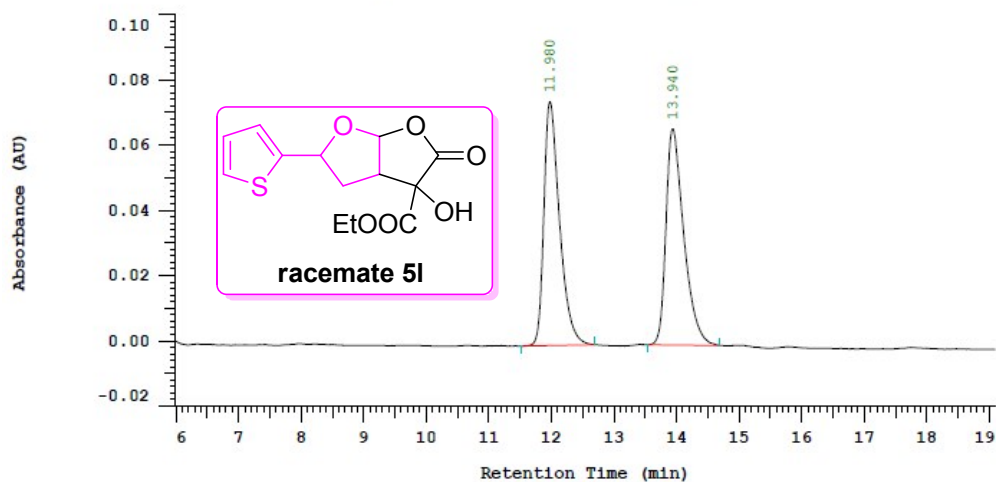

Chrom Type: Fixed WL Chromatogram, 210 nm

Peak Quantitation: AREA  
Calculation Method: AREA%

| No. | RT     | Area    | Area %  | BC |
|-----|--------|---------|---------|----|
| 1   | 11.980 | 646666  | 49.585  | BB |
| 2   | 13.940 | 657486  | 50.415  | BB |
|     |        | 1304152 | 100.000 |    |

Chrom Type: Fixed WL Chromatogram, 210 nm

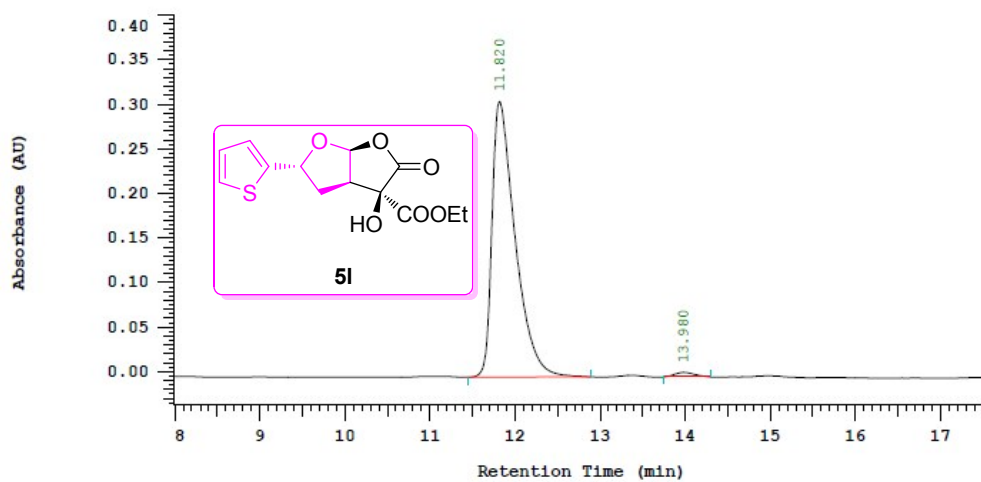

Chrom Type: Fixed WL Chromatogram, 210 nm

Peak Quantitation: AREA  
Calculation Method: AREA%

| No. | RT     | Area    | Area %  | BC |
|-----|--------|---------|---------|----|
| 1   | 11.820 | 2917415 | 98.642  | BB |
| 2   | 13.980 | 40158   | 1.358   | BB |
|     |        | 2957573 | 100.000 |    |

PROTON\_01  
LJY-S-down

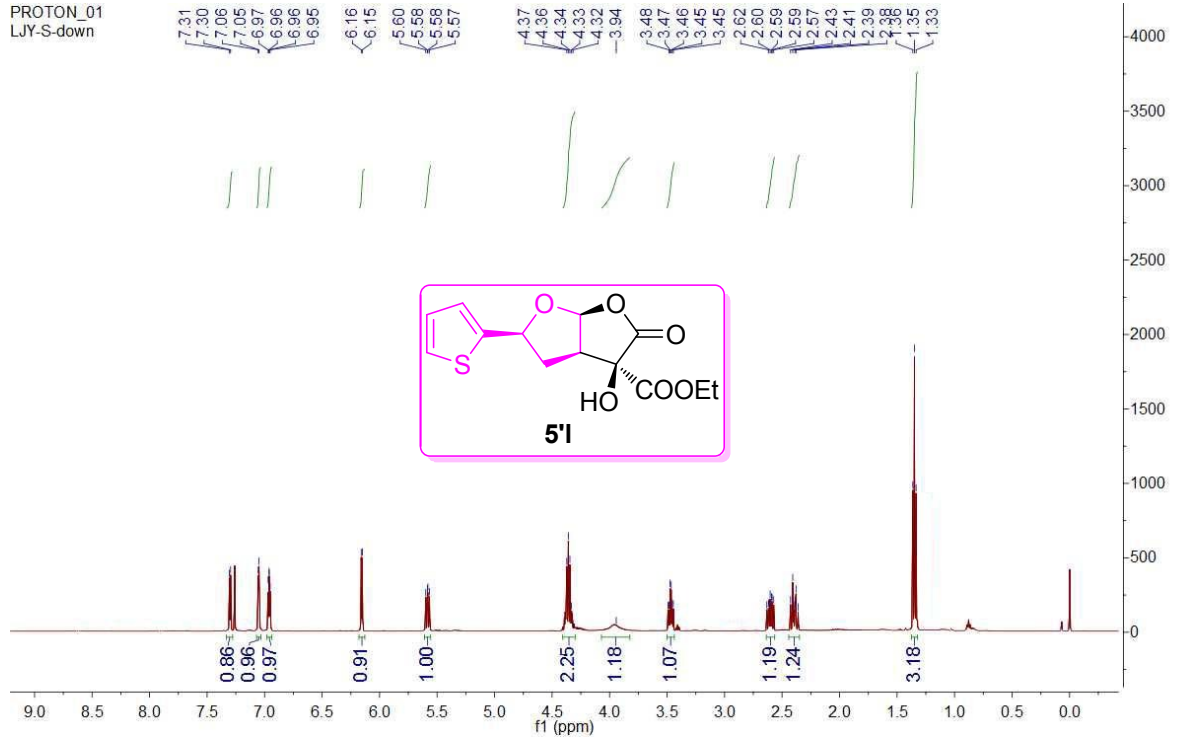

CARBON\_01  
LJY-S-down

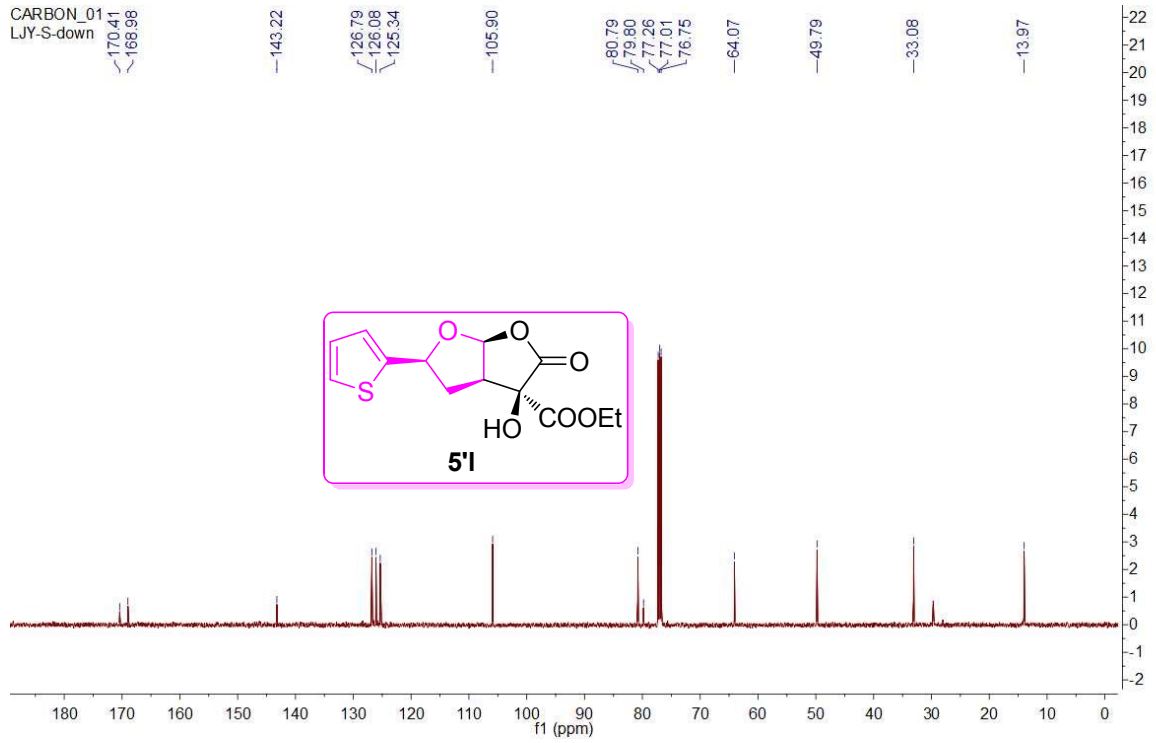

Chrom Type: Fixed WL Chromatogram, 210 nm

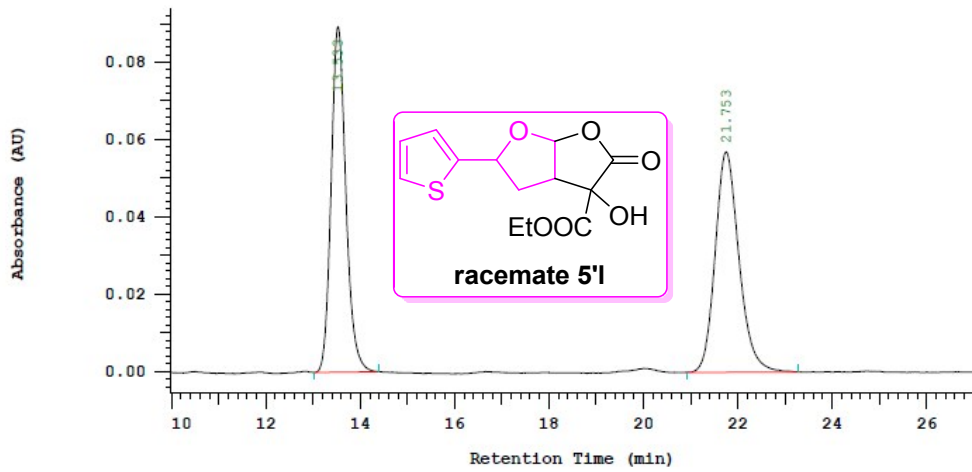

Chrom Type: Fixed WL Chromatogram, 210 nm

Peak Quantitation: AREA  
Calculation Method: AREA%

| No. | RT     | Area    | Area %  | BC |
|-----|--------|---------|---------|----|
| 1   | 13.533 | 970318  | 49.276  | BB |
| 2   | 21.753 | 998836  | 50.724  | BB |
|     |        | 1969154 | 100.000 |    |

Chrom Type: Fixed WL Chromatogram, 210 nm

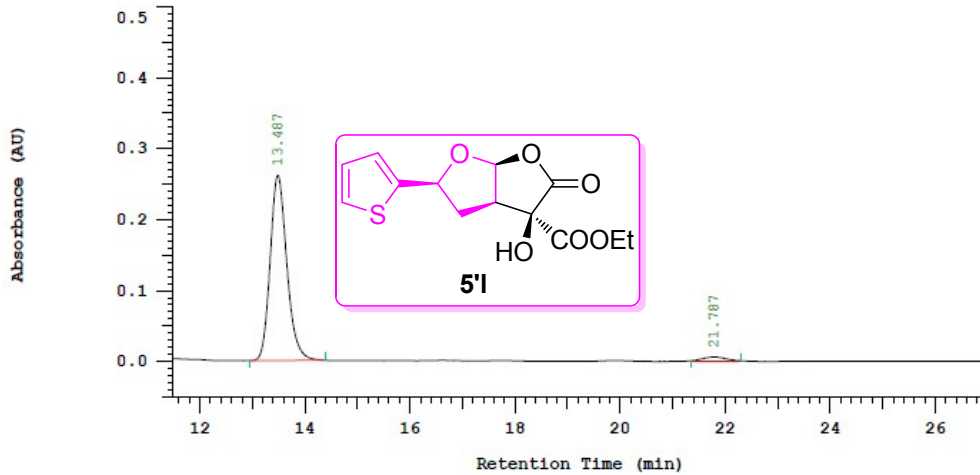

Chrom Type: Fixed WL Chromatogram, 210 nm

Peak Quantitation: AREA  
Calculation Method: AREA%

| No. | RT     | Area    | Area %  | BC |
|-----|--------|---------|---------|----|
| 1   | 13.487 | 2868748 | 97.381  | BB |
| 2   | 21.787 | 77156   | 2.619   | BB |
|     |        | 2945904 | 100.000 |    |

PROTON\_01  
LJY-1N-up

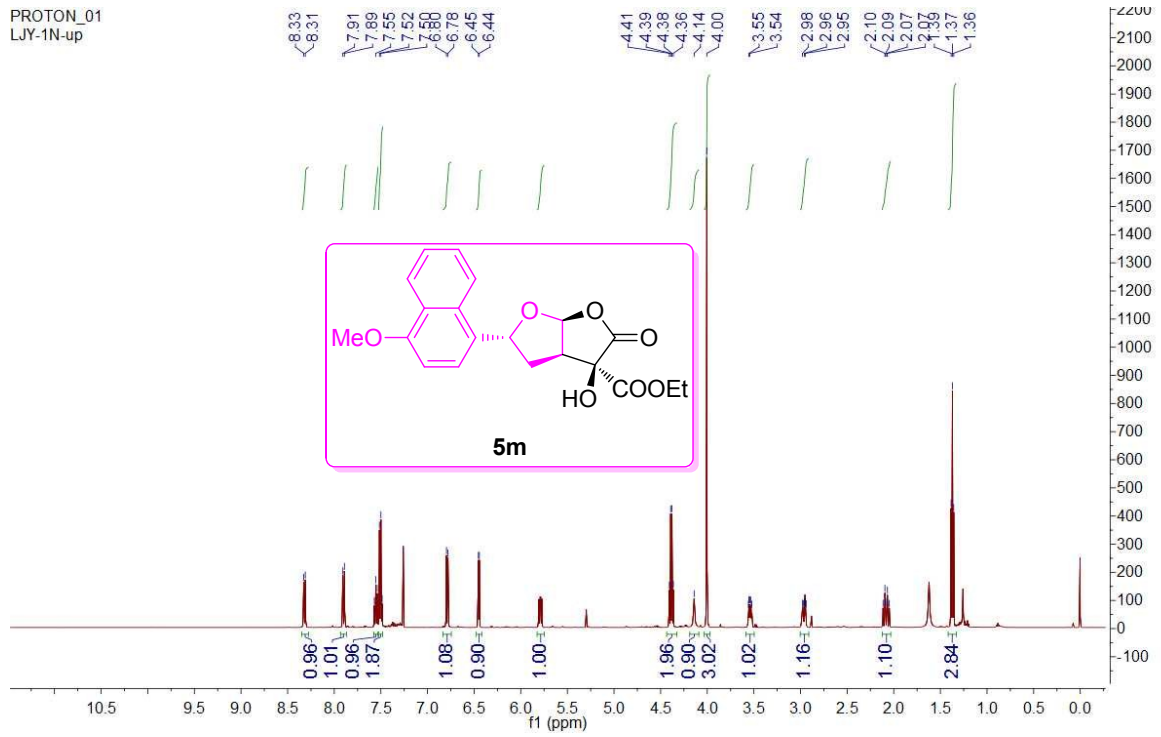

CARBON\_01  
LJY-1N-up

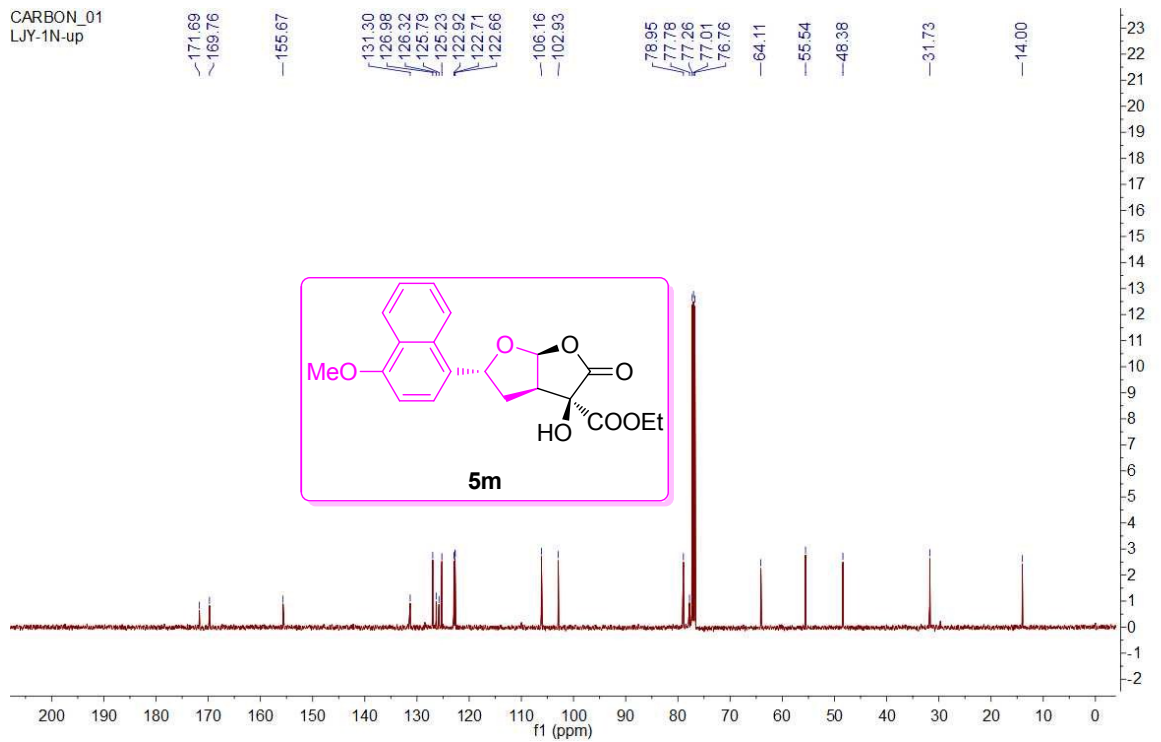

Chrom Type: Fixed WL Chromatogram, 210 nm

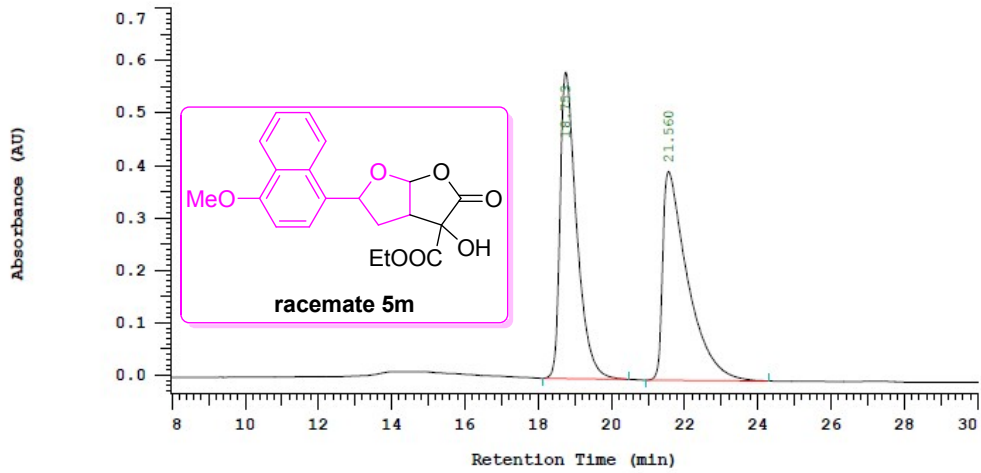

Chrom Type: Fixed WL Chromatogram, 210 nm

Peak Quantitation: AREA  
Calculation Method: AREA%

| No. | RT     | Area     | Area %  | BC |
|-----|--------|----------|---------|----|
| 1   | 18.753 | 9178247  | 49.345  | BB |
| 2   | 21.560 | 9421936  | 50.655  | BB |
|     |        | 18600183 | 100.000 |    |

Chrom Type: Fixed WL Chromatogram, 210 nm

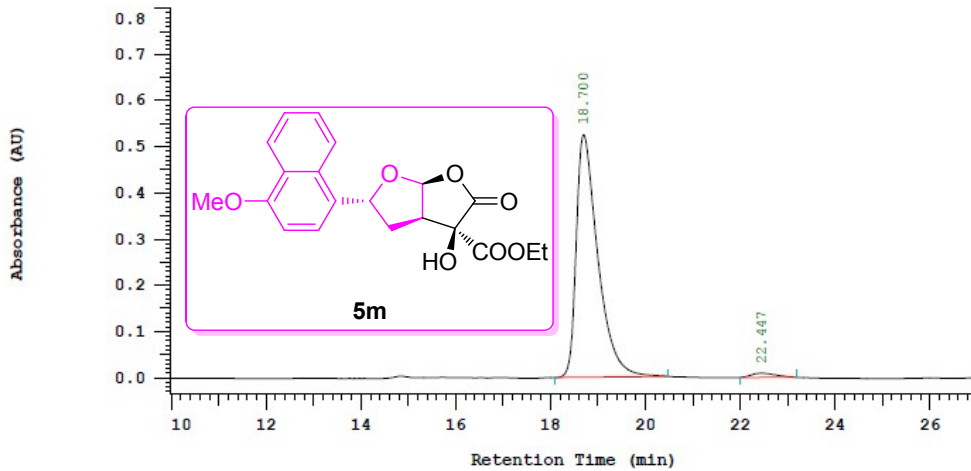

Chrom Type: Fixed WL Chromatogram, 210 nm

Peak Quantitation: AREA  
Calculation Method: AREA%

| No. | RT     | Area    | Area %  | BC |
|-----|--------|---------|---------|----|
| 1   | 18.700 | 8299237 | 98.088  | BB |
| 2   | 22.447 | 161740  | 1.912   | BB |
|     |        | 8460977 | 100.000 |    |



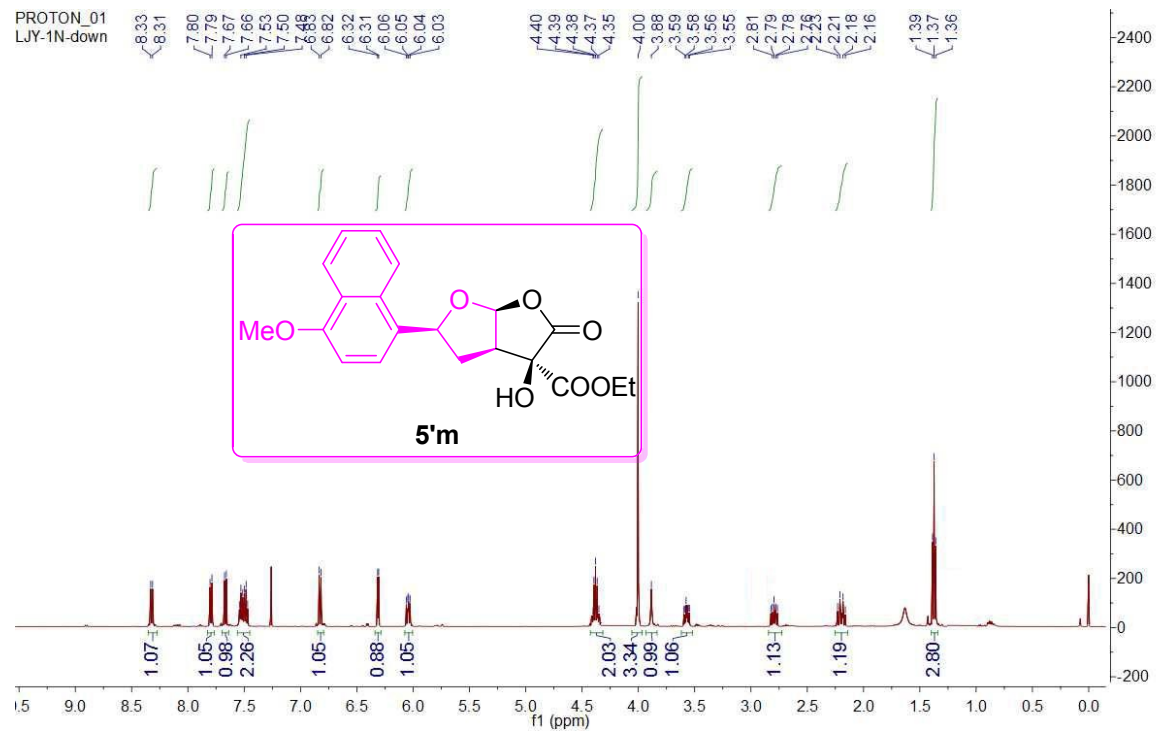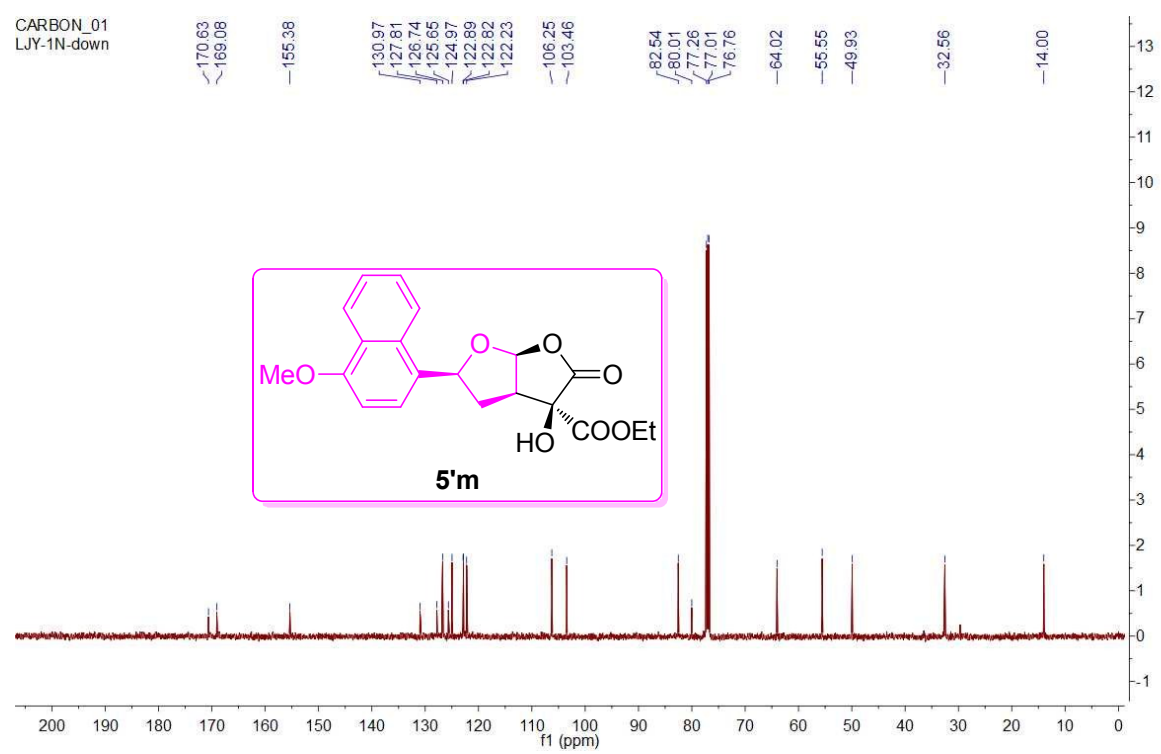

Chrom Type: Fixed WL Chromatogram, 210 nm

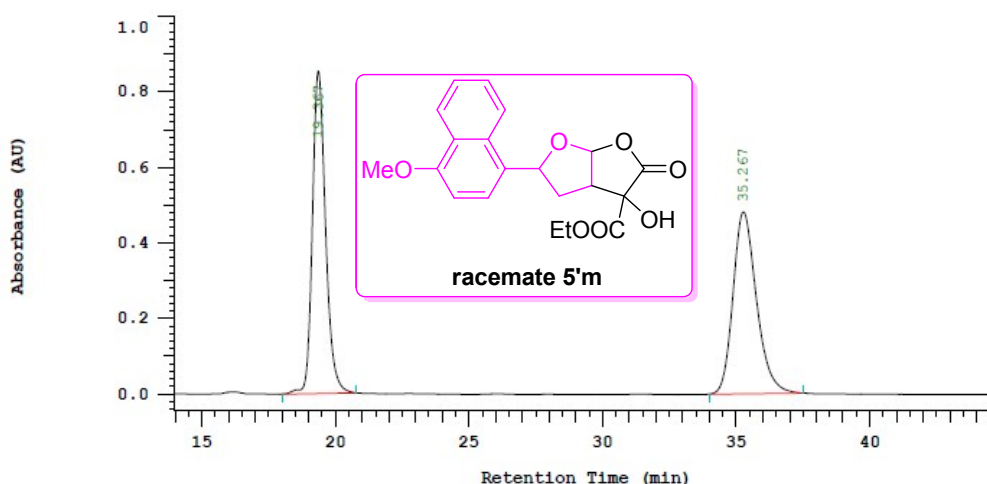

Chrom Type: Fixed WL Chromatogram, 210 nm

Peak Quantitation: AREA  
Calculation Method: AREA%

| No. | RT     | Area     | Area %  | BC |
|-----|--------|----------|---------|----|
| 1   | 19.367 | 14509425 | 49.834  | BB |
| 2   | 35.267 | 14605921 | 50.166  | BB |
|     |        | 29115346 | 100.000 |    |

Chrom Type: Fixed WL Chromatogram, 210 nm

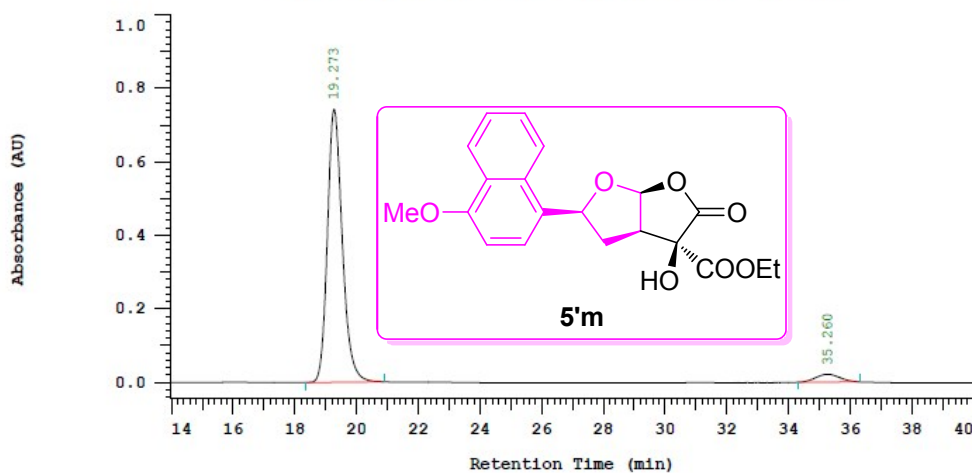

Chrom Type: Fixed WL Chromatogram, 210 nm

Peak Quantitation: AREA  
Calculation Method: AREA%

| No. | RT     | Area     | Area %  | BC |
|-----|--------|----------|---------|----|
| 1   | 19.273 | 12406667 | 95.494  | BB |
| 2   | 35.260 | 585392   | 4.506   | BB |
|     |        | 12992059 | 100.000 |    |

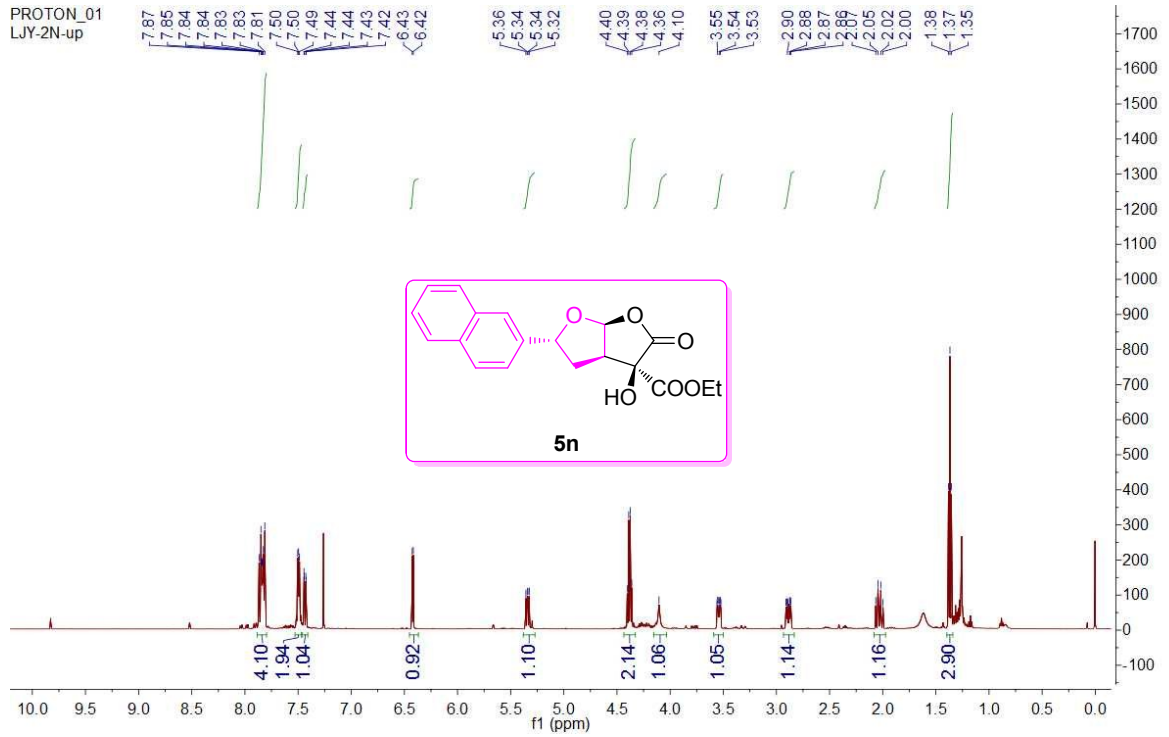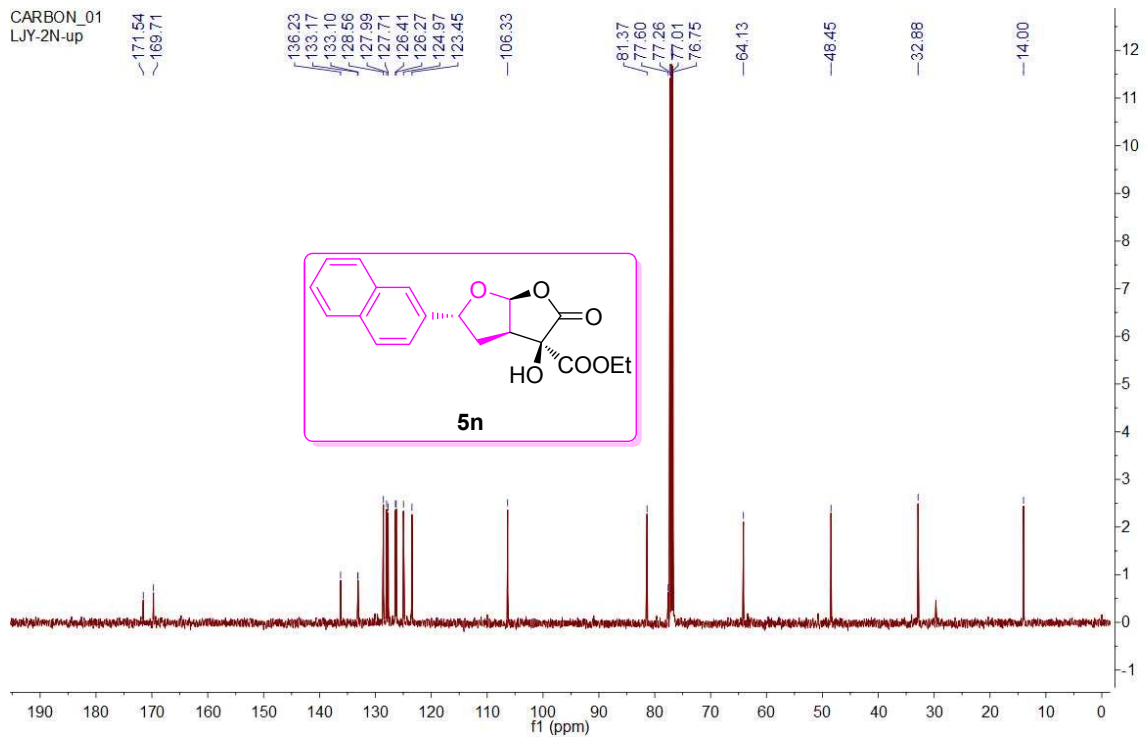

Chrom Type: Fixed WL Chromatogram, 210 nm

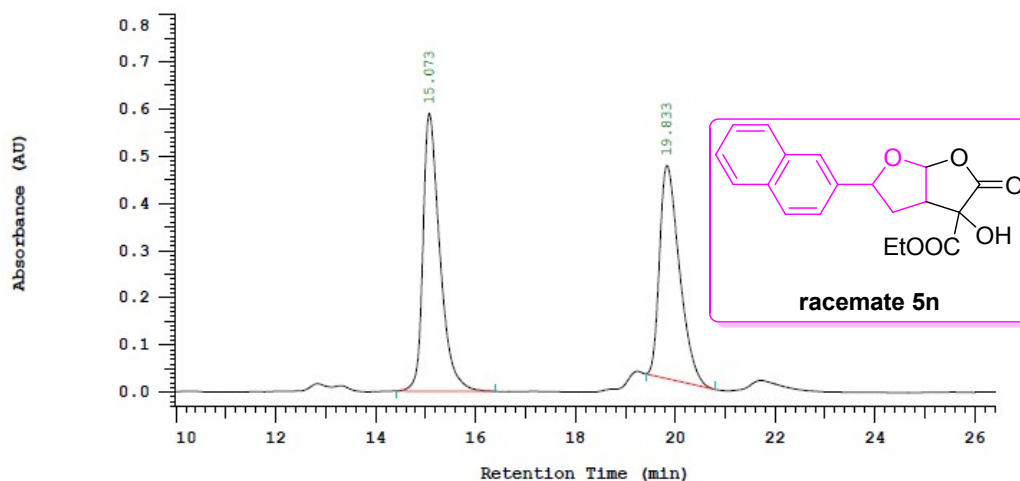

Chrom Type: Fixed WL Chromatogram, 210 nm

Peak Quantitation: AREA  
Calculation Method: AREA%

| No. | RT     | Area     | Area %  | BC |
|-----|--------|----------|---------|----|
| 1   | 15.073 | 6909830  | 52.426  | BB |
| 2   | 19.833 | 6270288  | 47.574  | BB |
|     |        | 13180118 | 100.000 |    |

Chrom Type: Fixed WL Chromatogram, 210 nm

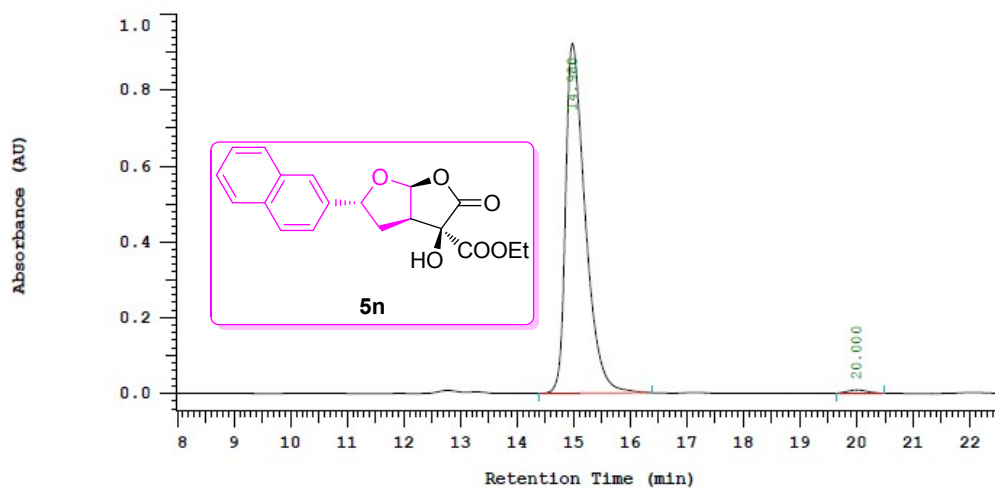

Chrom Type: Fixed WL Chromatogram, 210 nm

Peak Quantitation: AREA  
Calculation Method: AREA%

| No. | RT     | Area     | Area %  | BC |
|-----|--------|----------|---------|----|
| 1   | 14.980 | 11095870 | 99.103  | BB |
| 2   | 20.000 | 100414   | 0.897   | BB |
|     |        | 11196284 | 100.000 |    |

PROTON\_01  
LJY-2N-down

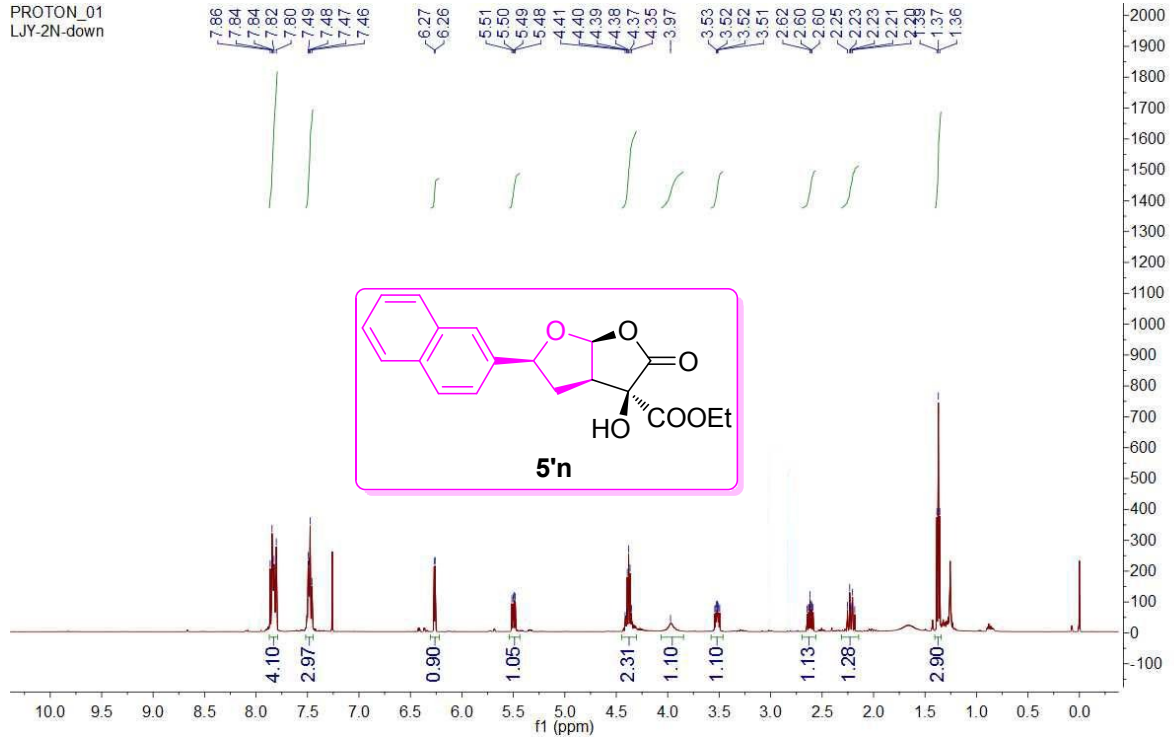

CARBON\_01  
LJY-2N-down

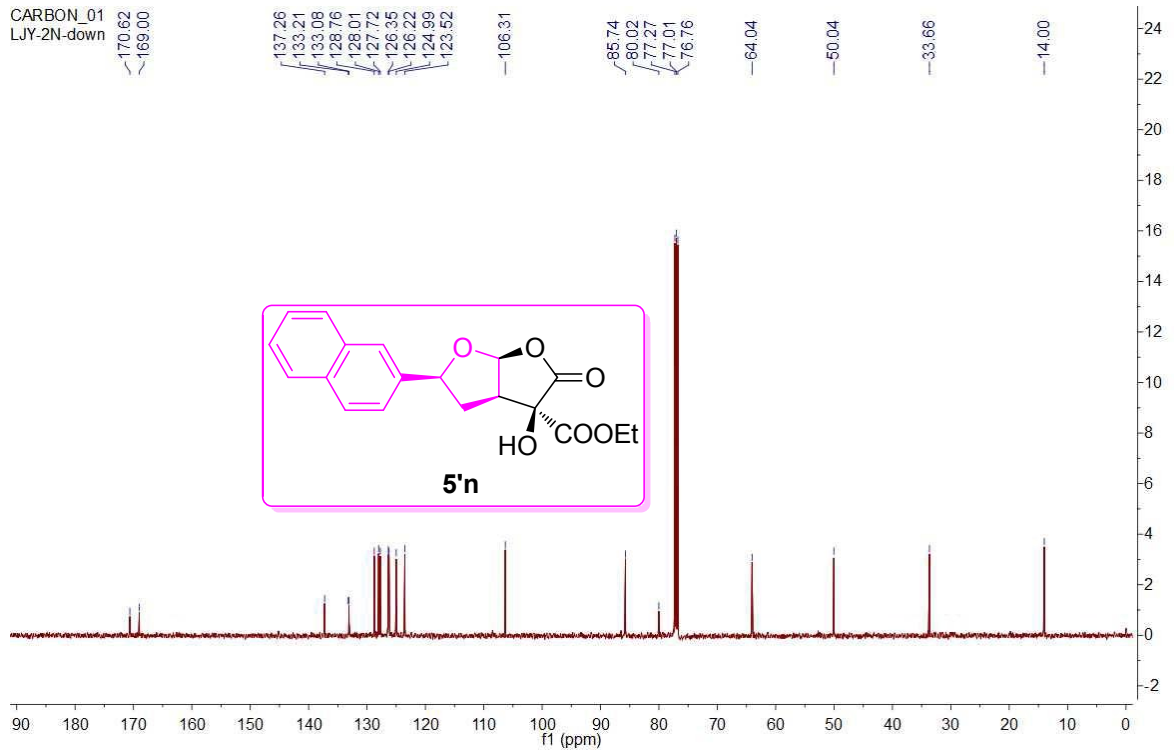

Chrom Type: Fixed WL Chromatogram, 210 nm

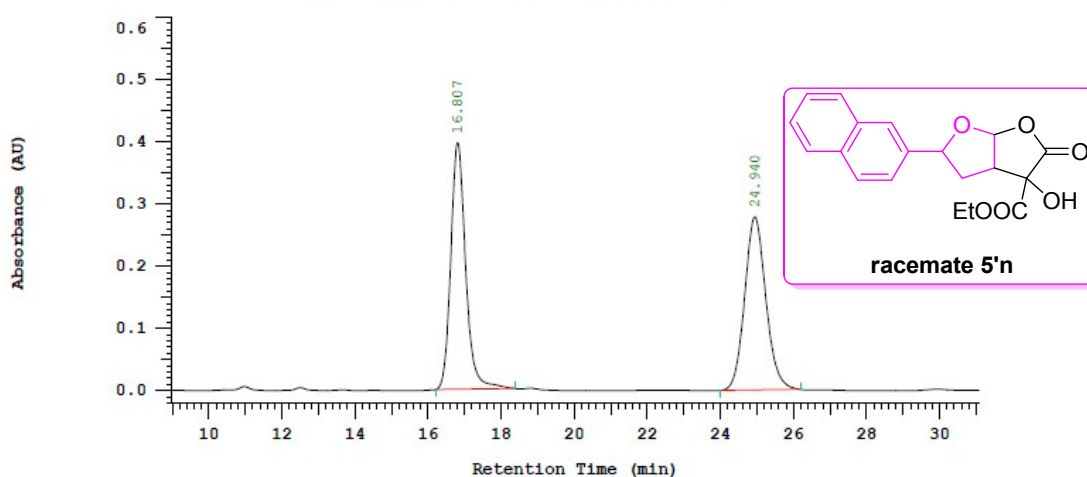

Chrom Type: Fixed WL Chromatogram, 210 nm

Peak Quantitation: AREA  
Calculation Method: AREA%

| No. | RT     | Area     | Area %  | BC |
|-----|--------|----------|---------|----|
| 1   | 16.807 | 5585612  | 49.880  | BB |
| 2   | 24.940 | 5612455  | 50.120  | BB |
|     |        | 11198067 | 100.000 |    |

Chrom Type: Fixed WL Chromatogram, 210 nm

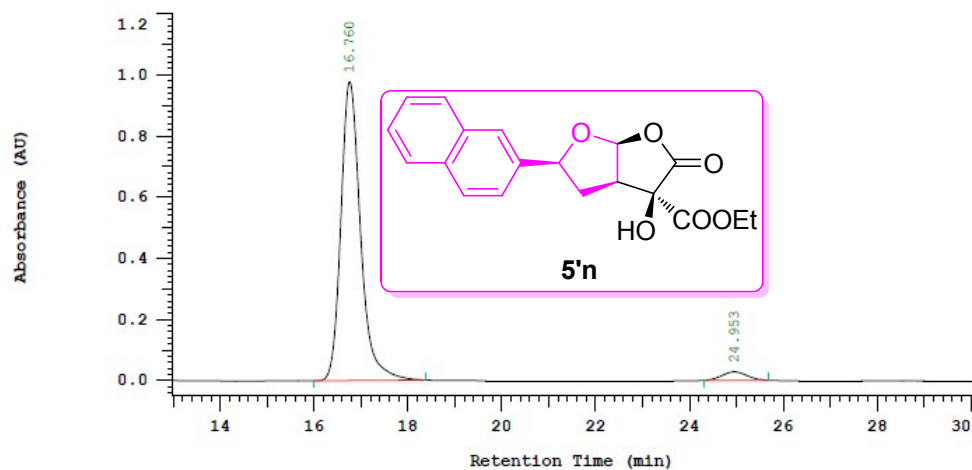

Chrom Type: Fixed WL Chromatogram, 210 nm

Peak Quantitation: AREA  
Calculation Method: AREA%

| No. | RT     | Area     | Area %  | BC |
|-----|--------|----------|---------|----|
| 1   | 16.760 | 14269208 | 96.468  | BB |
| 2   | 24.953 | 522513   | 3.532   | BB |
|     |        | 14791721 | 100.000 |    |

PROTON\_01  
LJY-Et-up

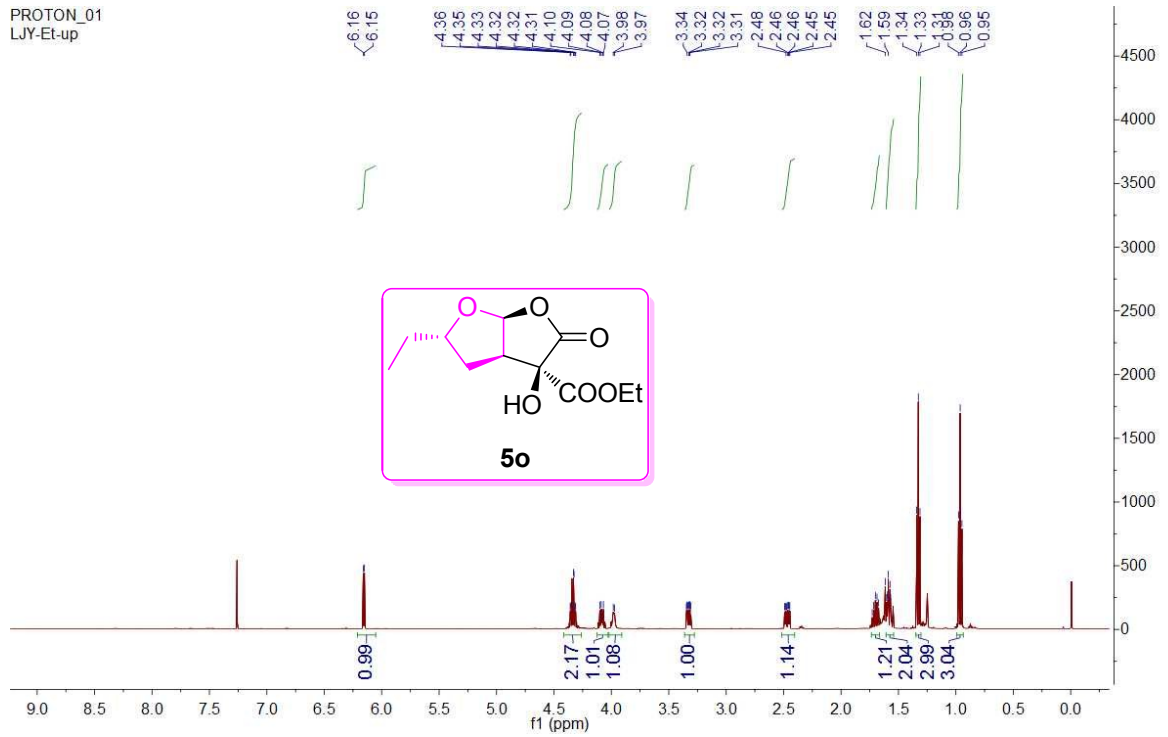

CARBON\_01  
LJY-Et-up

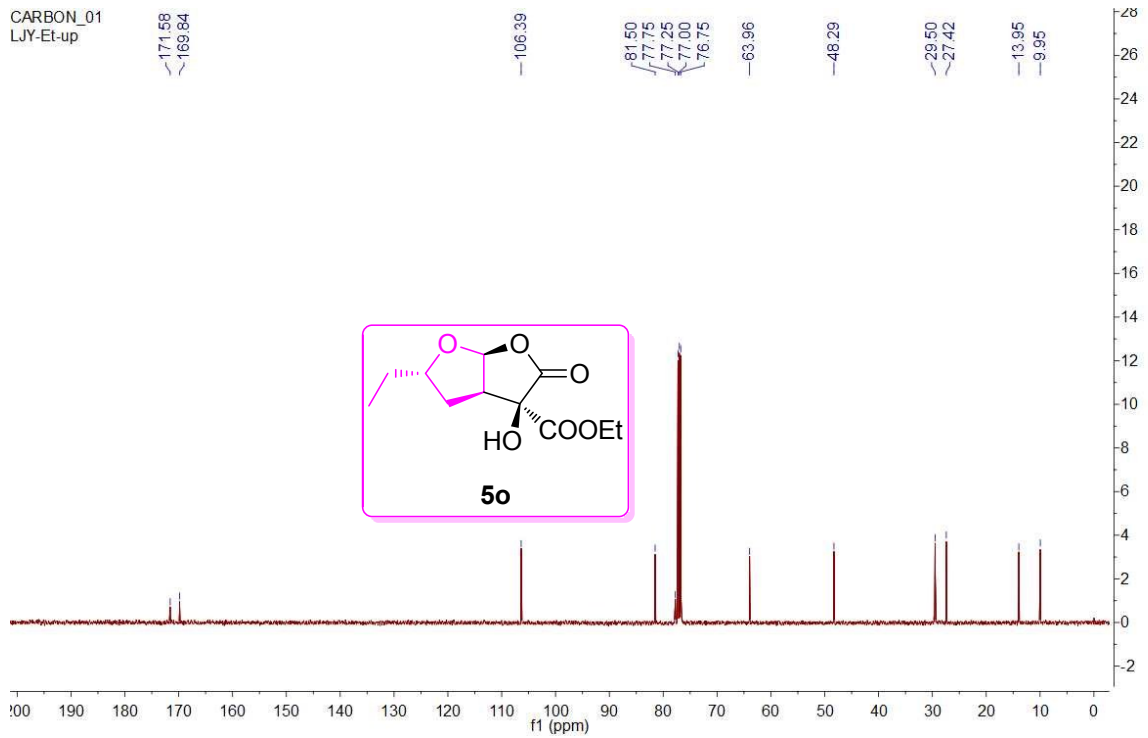

Chrom Type: Fixed WL Chromatogram, 210 nm

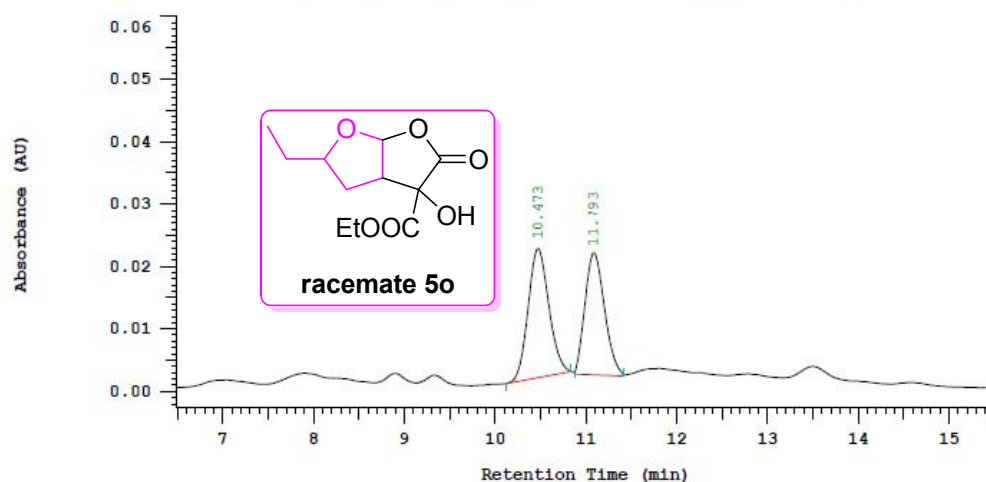

Chrom Type: Fixed WL Chromatogram, 210 nm

Peak Quantitation: AREA  
Calculation Method: AREA%

| No. | RT     | Area   | Area %  | BC |
|-----|--------|--------|---------|----|
| 1   | 10.473 | 163671 | 49.941  | BB |
| 2   | 11.193 | 164056 | 50.059  | BB |
|     |        | 327727 | 100.000 |    |

Chrom Type: Fixed WL Chromatogram, 210 nm

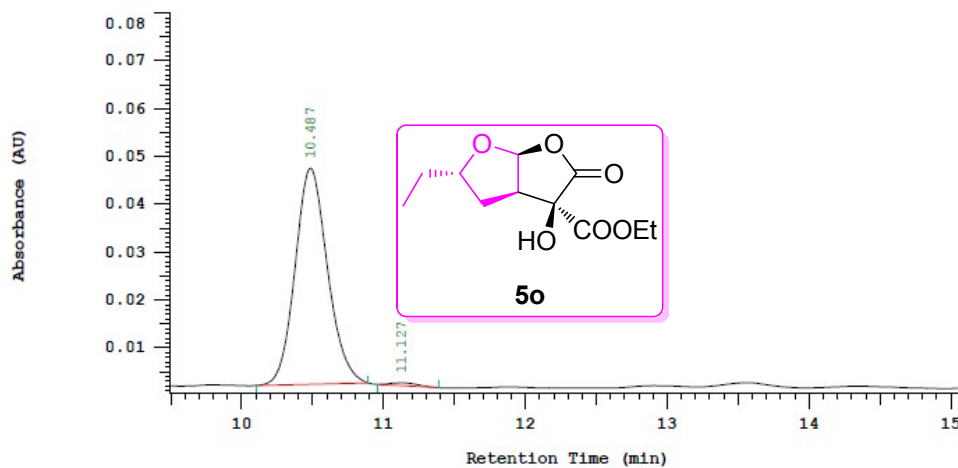

Chrom Type: Fixed WL Chromatogram, 210 nm

Peak Quantitation: AREA  
Calculation Method: AREA%

| No. | RT     | Area   | Area %  | BC |
|-----|--------|--------|---------|----|
| 1   | 10.487 | 358532 | 98.846  | BB |
| 2   | 11.127 | 4185   | 1.154   | BB |
|     |        | 362717 | 100.000 |    |



PROTON\_01  
LJY-Et-down

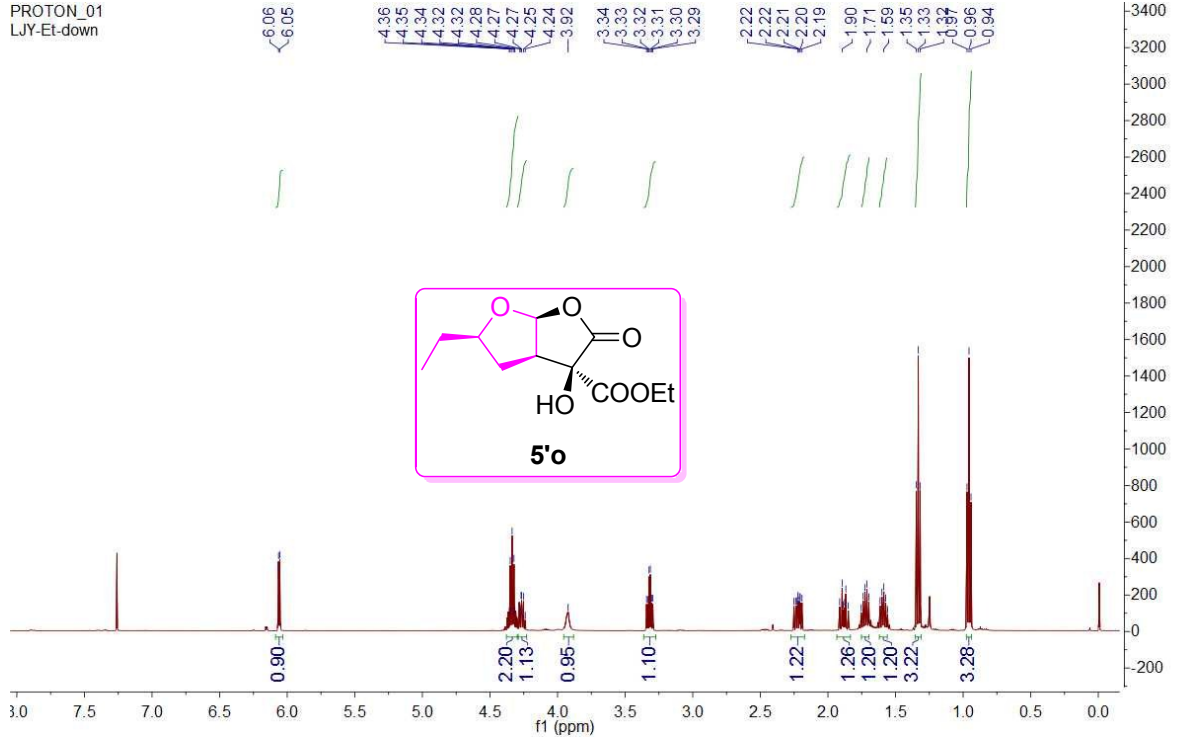

CARBON\_01  
LJY-Et-down

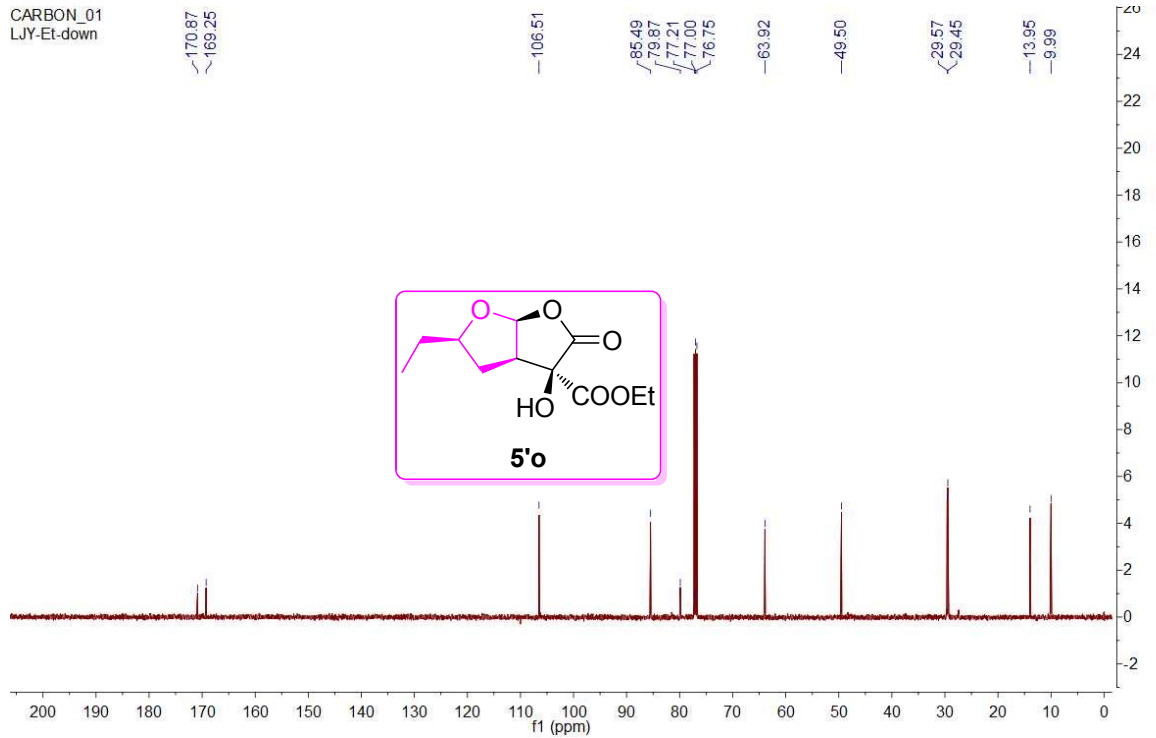

Chrom Type: Fixed WL Chromatogram, 210 nm

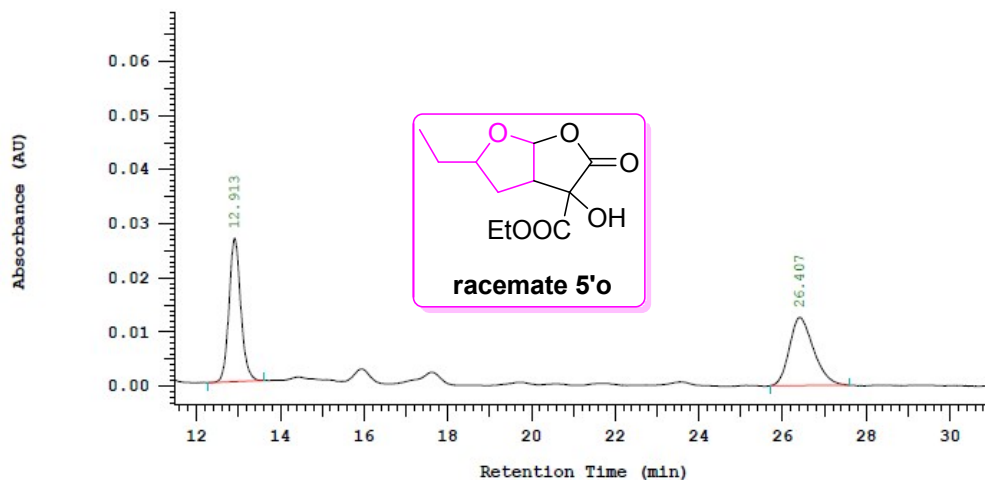

Chrom Type: Fixed WL Chromatogram, 210 nm

Peak Quantitation: AREA  
Calculation Method: AREA%

| No. | RT     | Area   | Area %  | BC |
|-----|--------|--------|---------|----|
| 1   | 12.913 | 258154 | 50.552  | BB |
| 2   | 26.407 | 252517 | 49.448  | BB |
|     |        | 510671 | 100.000 |    |

Chrom Type: Fixed WL Chromatogram, 210 nm

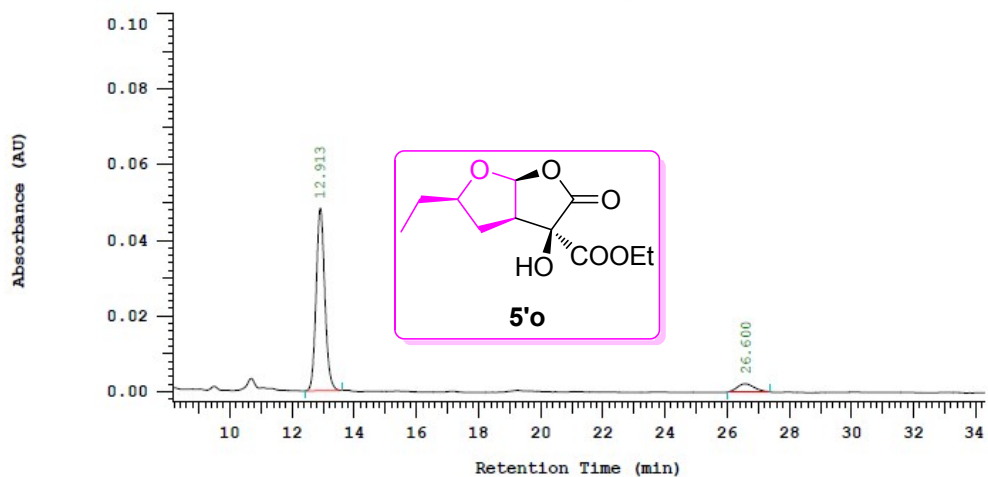

Chrom Type: Fixed WL Chromatogram, 210 nm

Peak Quantitation: AREA  
Calculation Method: AREA%

| No. | RT     | Area   | Area %  | BC |
|-----|--------|--------|---------|----|
| 1   | 12.913 | 463645 | 91.770  | BB |
| 2   | 26.600 | 41579  | 8.230   | BB |
|     |        | 505224 | 100.000 |    |

PROTON\_01  
LJY-Bn-up

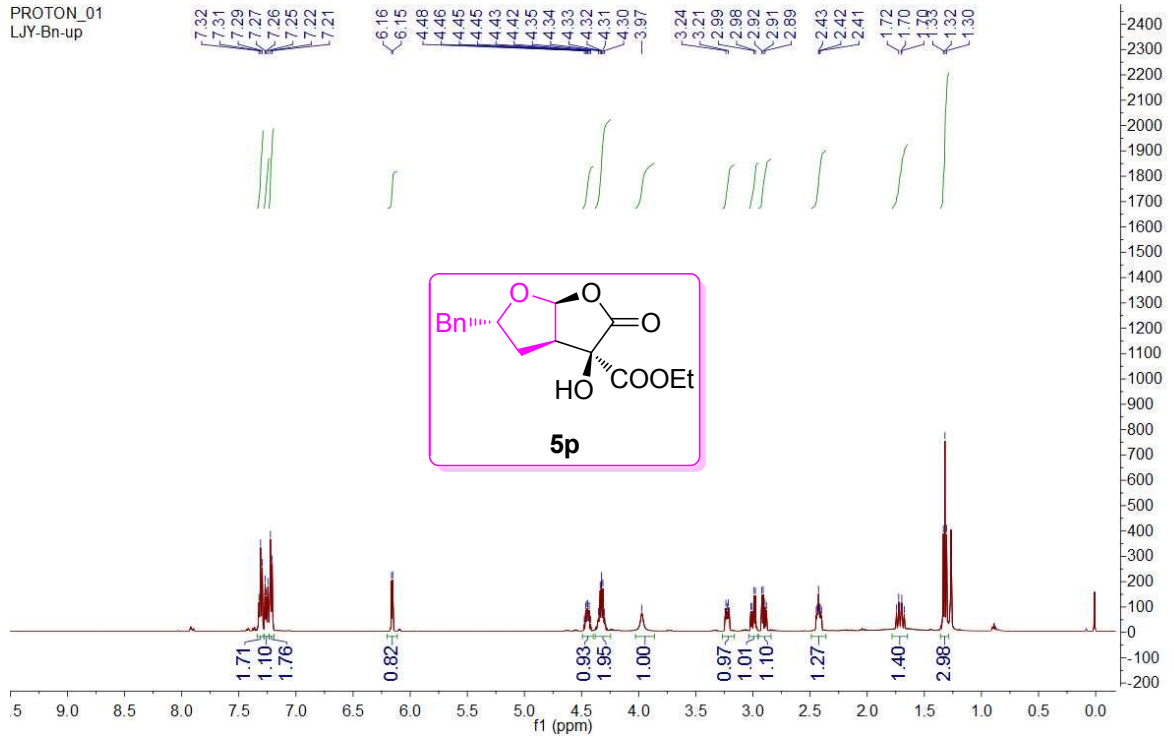

CARBON\_01  
LJY-Bn-up

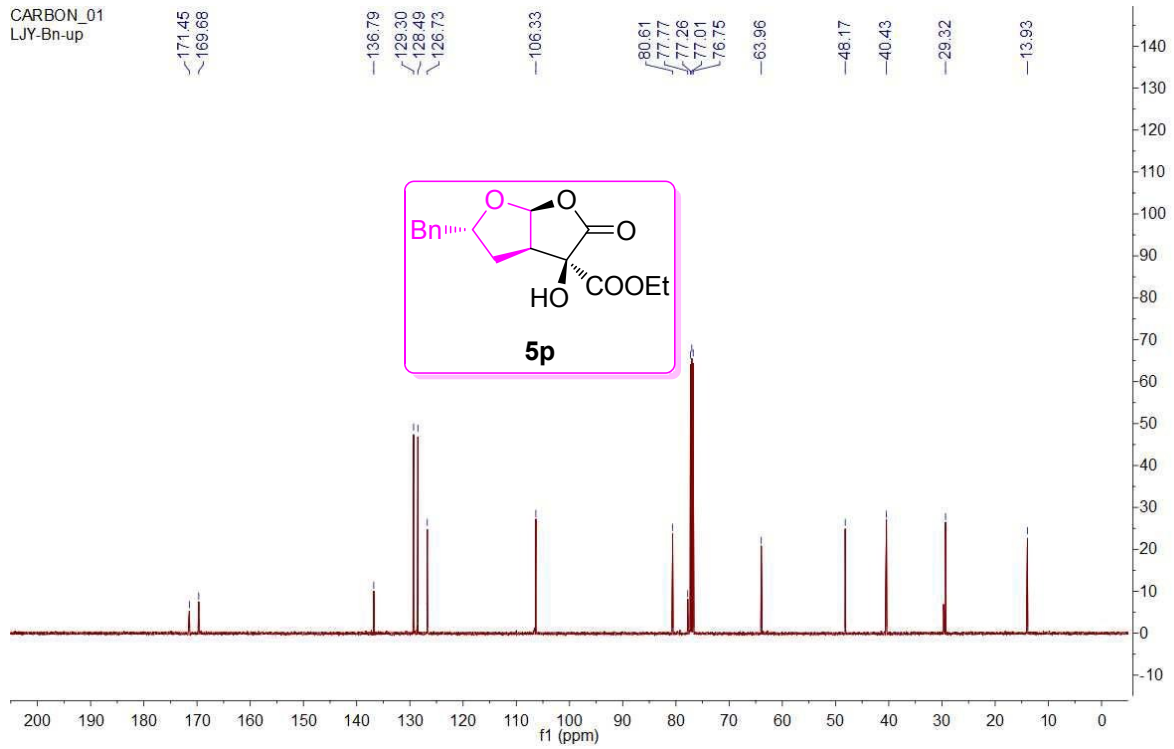

Chrom Type: Fixed WL Chromatogram, 210 nm

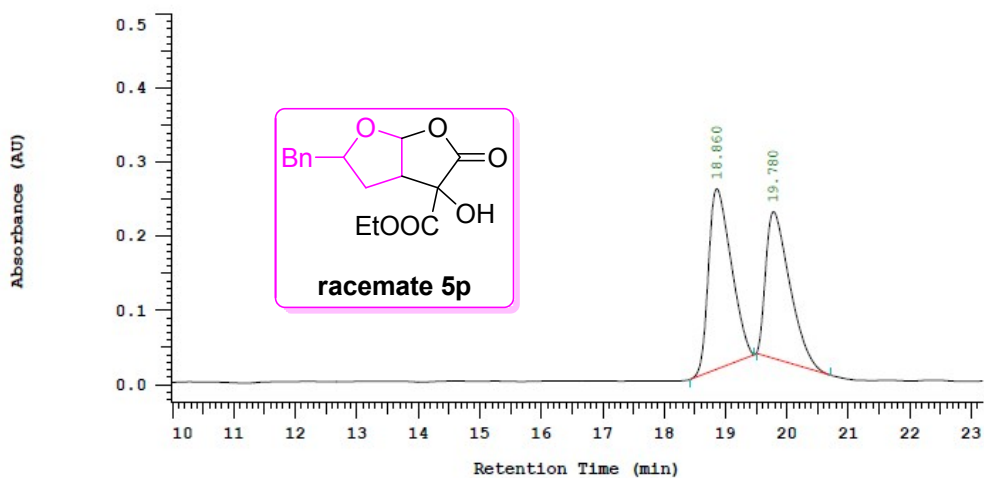

Chrom Type: Fixed WL Chromatogram, 210 nm

Peak Quantitation: AREA  
Calculation Method: AREA%

| No. | RT     | Area    | Area %  | BC |
|-----|--------|---------|---------|----|
| 1   | 18.860 | 3112573 | 53.531  | BB |
| 2   | 19.780 | 2701940 | 46.469  | BB |
|     |        | 5814513 | 100.000 |    |

Chrom Type: Fixed WL Chromatogram, 210 nm

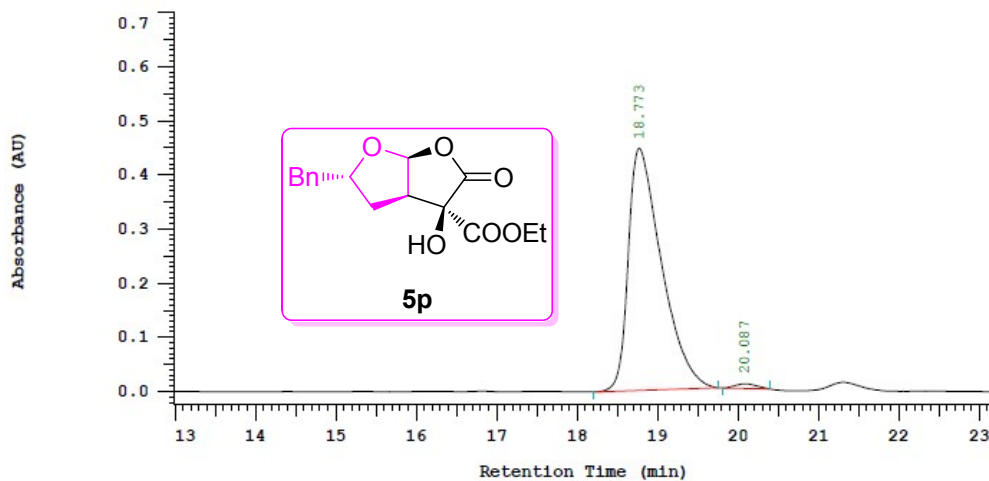

Chrom Type: Fixed WL Chromatogram, 210 nm

Peak Quantitation: AREA  
Calculation Method: AREA%

| No. | RT     | Area    | Area %  | BC |
|-----|--------|---------|---------|----|
| 1   | 18.773 | 6419059 | 98.743  | BB |
| 2   | 20.087 | 81730   | 1.257   | BB |
|     |        | 6500789 | 100.000 |    |

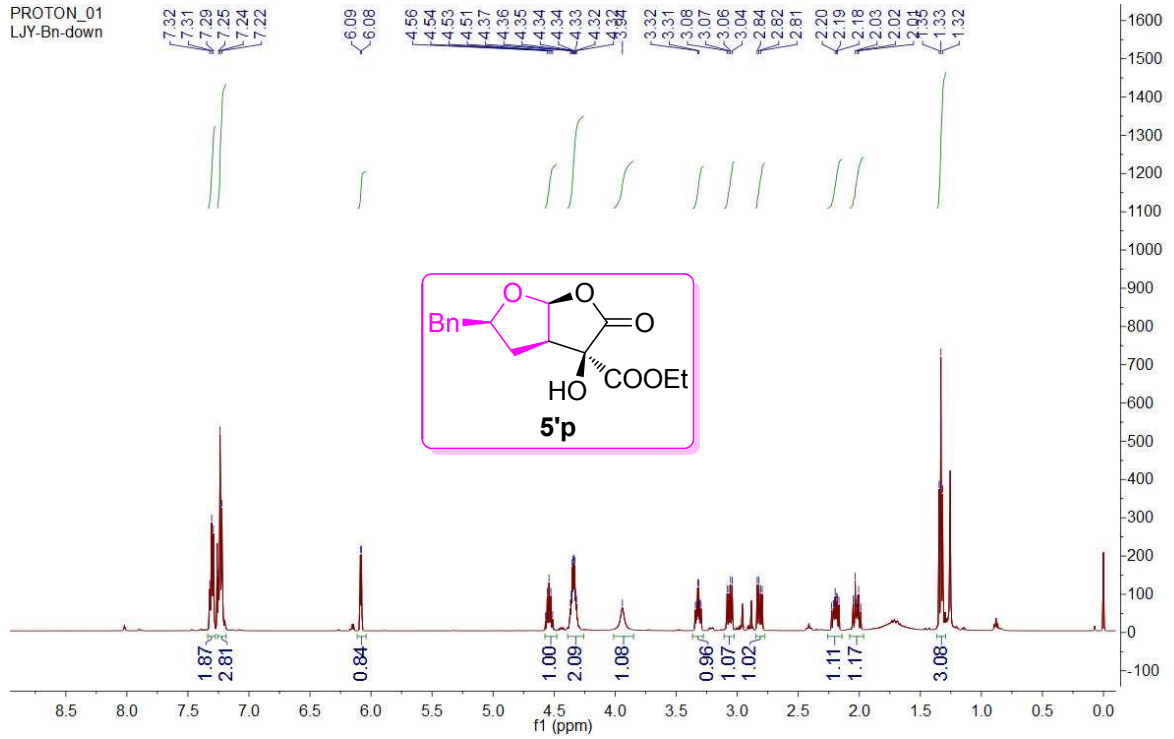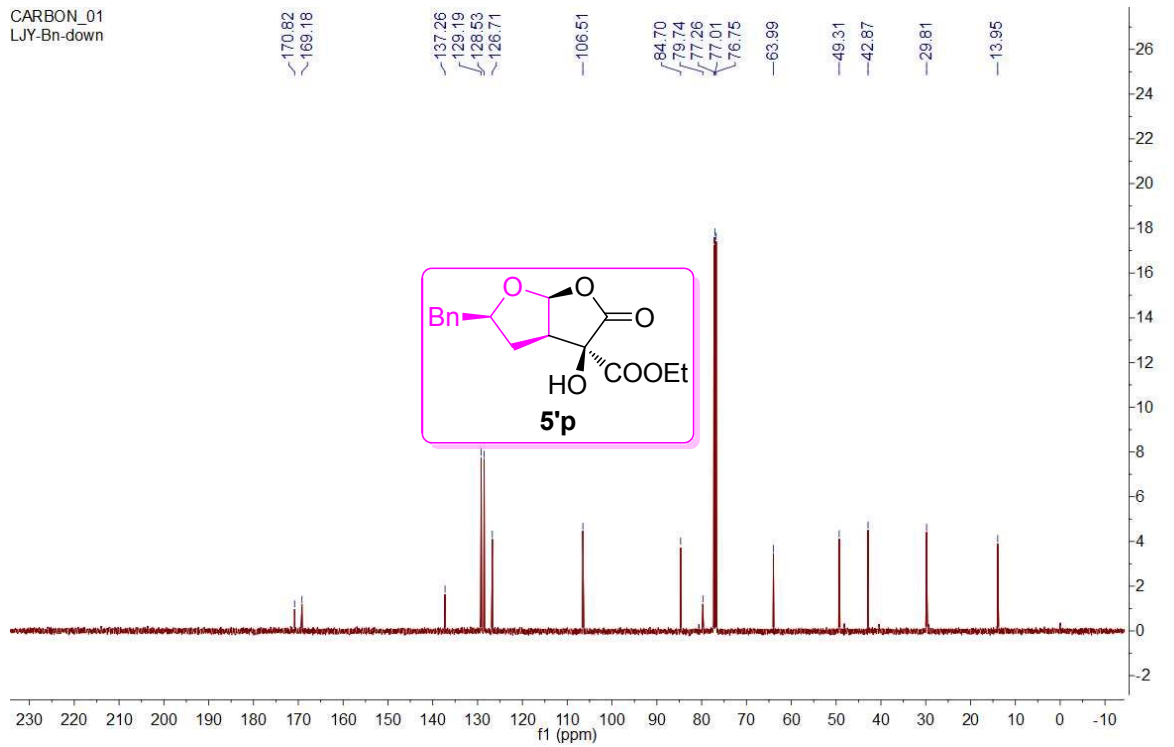

Chrom Type: Fixed WL Chromatogram, 210 nm

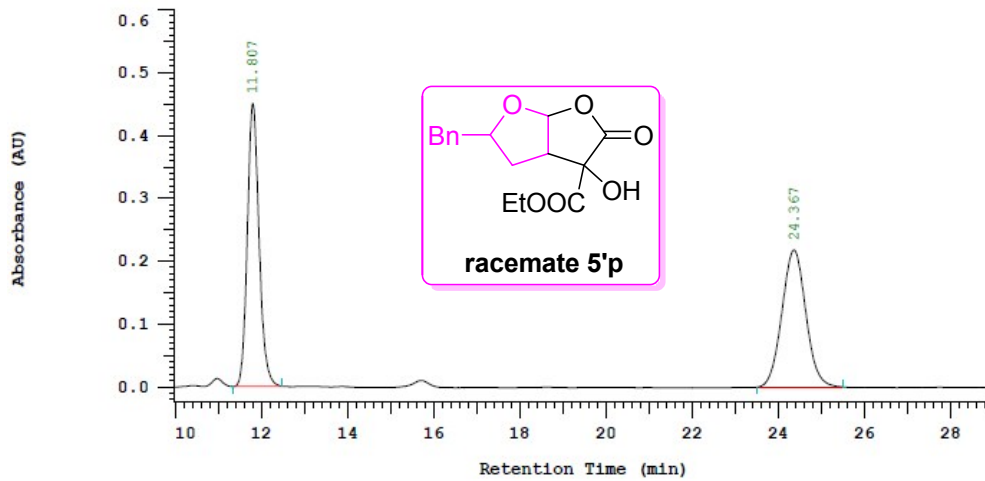

Chrom Type: Fixed WL Chromatogram, 210 nm

Peak Quantitation: AREA  
Calculation Method: AREA%

| No. | RT     | Area    | Area %  | BC |
|-----|--------|---------|---------|----|
| 1   | 11.807 | 4262755 | 50.369  | BB |
| 2   | 24.367 | 4200225 | 49.631  | BB |
|     |        | 8462980 | 100.000 |    |

Chrom Type: Fixed WL Chromatogram, 210 nm

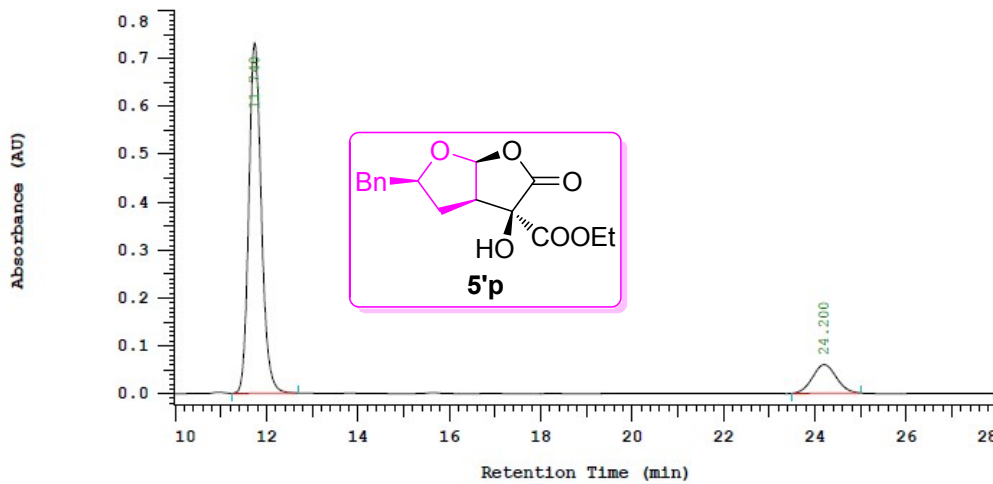

Chrom Type: Fixed WL Chromatogram, 210 nm

Peak Quantitation: AREA  
Calculation Method: AREA%

| No. | RT     | Area    | Area %  | BC |
|-----|--------|---------|---------|----|
| 1   | 11.740 | 6985527 | 86.575  | BB |
| 2   | 24.200 | 1083226 | 13.425  | BB |
|     |        | 8068753 | 100.000 |    |

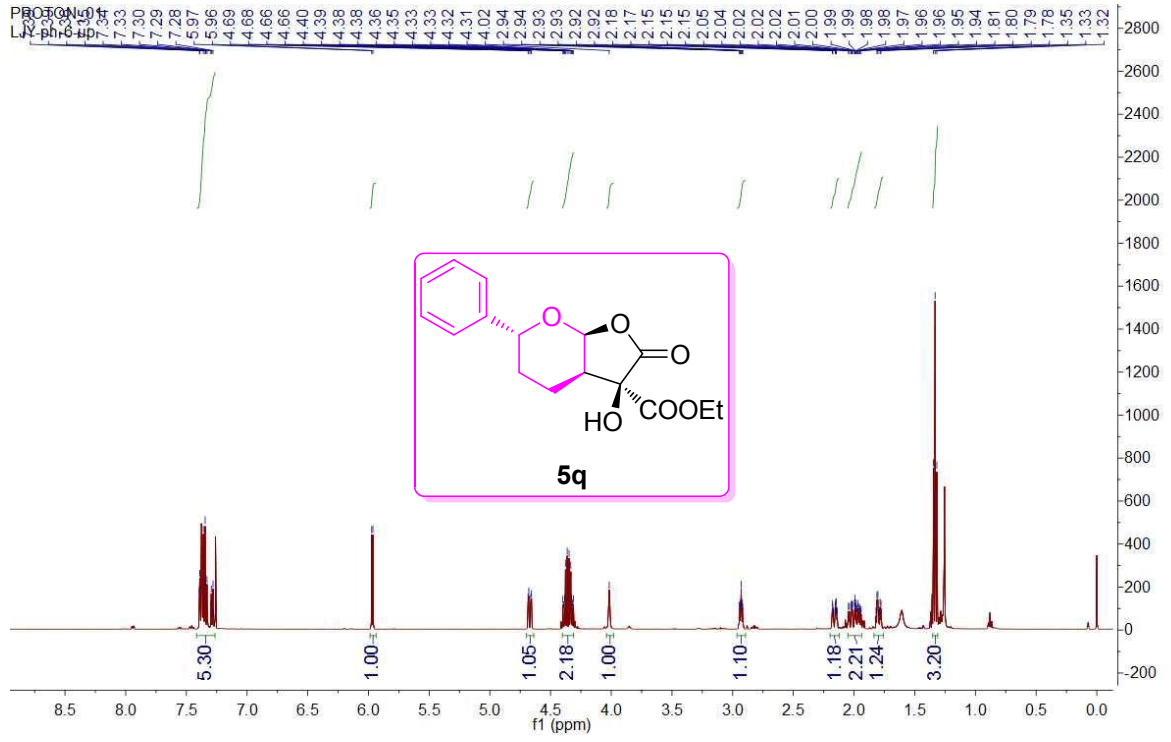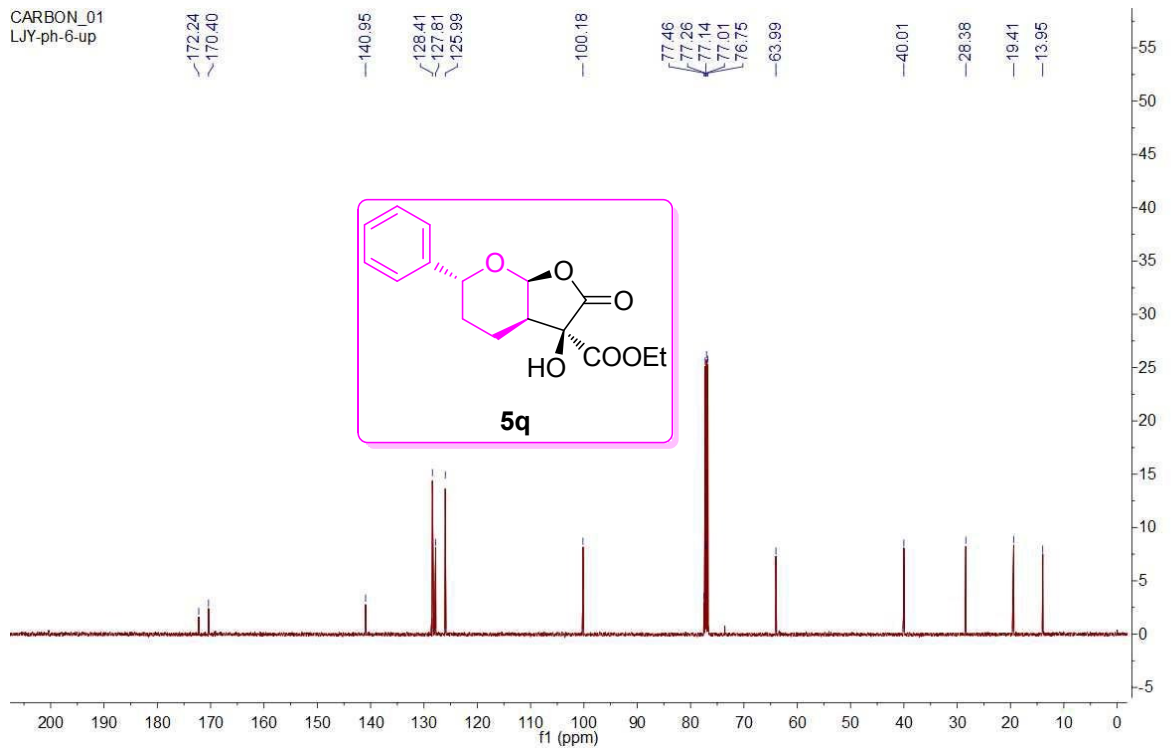

Chrom Type: Fixed WL Chromatogram, 210 nm

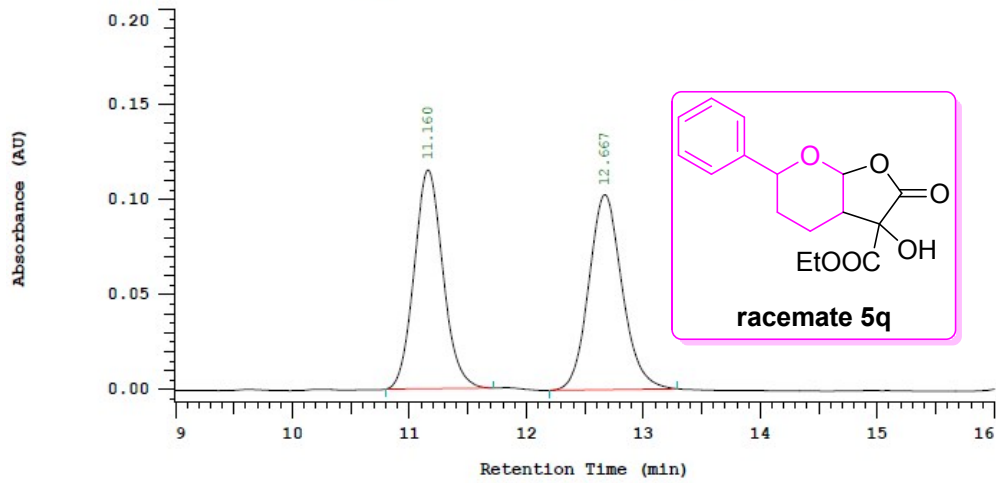

Chrom Type: Fixed WL Chromatogram, 210 nm

Peak Quantitation: AREA  
Calculation Method: AREA%

| No. | RT     | Area    | Area %  | BC |
|-----|--------|---------|---------|----|
| 1   | 11.160 | 984584  | 49.233  | BB |
| 2   | 12.667 | 1015258 | 50.767  | BB |
|     |        | 1999842 | 100.000 |    |

Chrom Type: Fixed WL Chromatogram, 210 nm

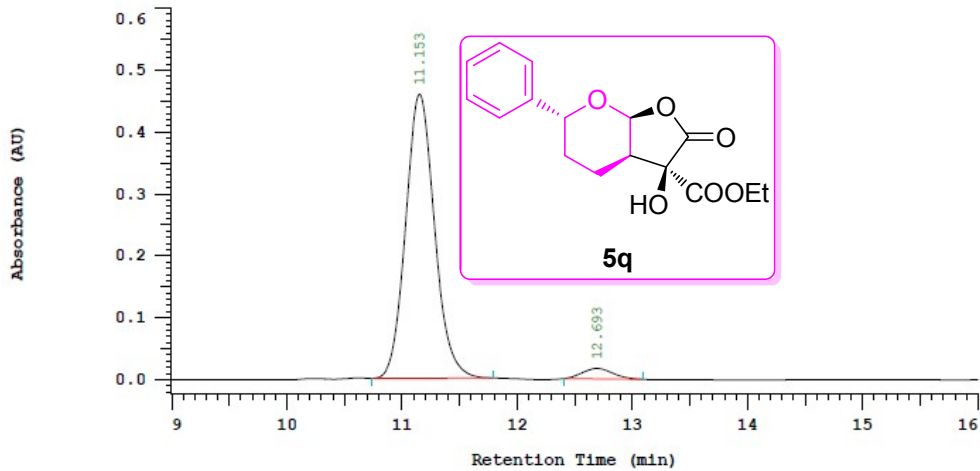

Chrom Type: Fixed WL Chromatogram, 210 nm

Peak Quantitation: AREA  
Calculation Method: AREA%

| No. | RT     | Area    | Area %  | BC |
|-----|--------|---------|---------|----|
| 1   | 11.153 | 3997333 | 96.222  | BB |
| 2   | 12.693 | 156932  | 3.778   | BB |
|     |        | 4154265 | 100.000 |    |



PROTON\_01  
LJY-ph-6-down

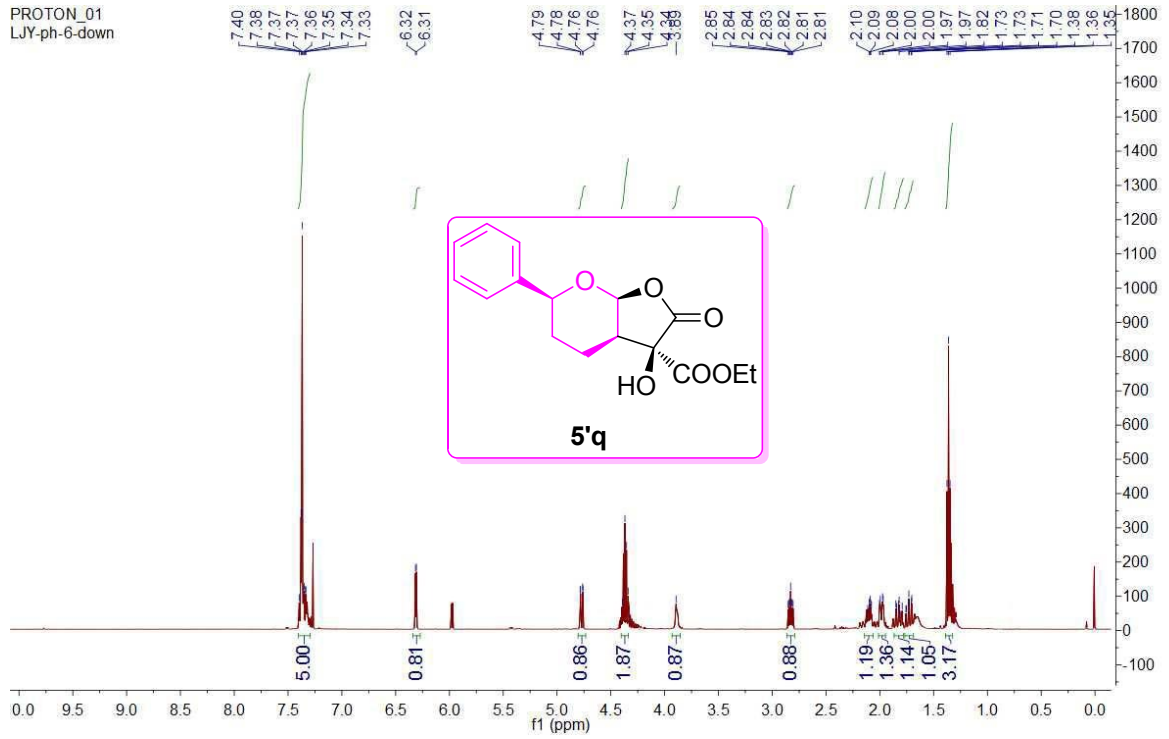

CARBON\_01  
LJY-ph-6-down

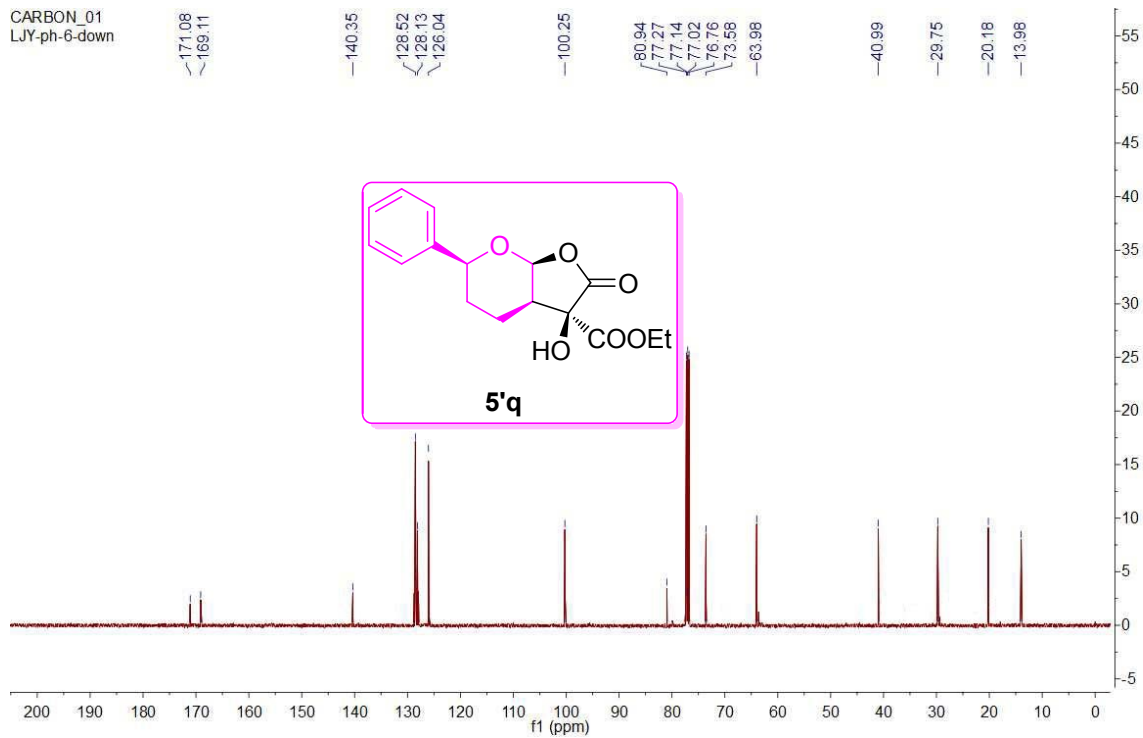

Chrom Type: Fixed WL Chromatogram, 210 nm

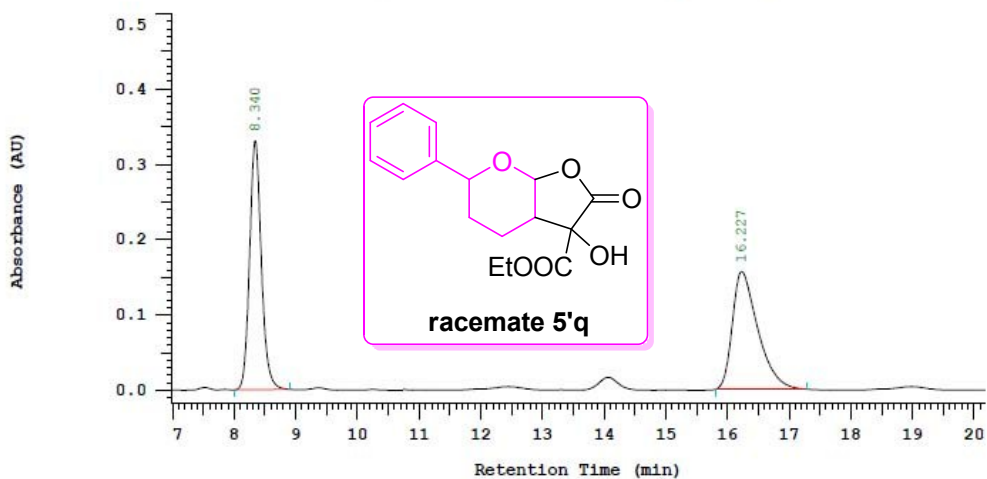

Chrom Type: Fixed WL Chromatogram, 210 nm

Peak Quantitation: AREA  
Calculation Method: AREA%

| No. | RT     | Area    | Area %  | BC |
|-----|--------|---------|---------|----|
| 1   | 8.340  | 2204411 | 49.549  | BB |
| 2   | 16.227 | 2244542 | 50.451  | BB |
|     |        | 4448953 | 100.000 |    |

Chrom Type: Fixed WL Chromatogram, 210 nm

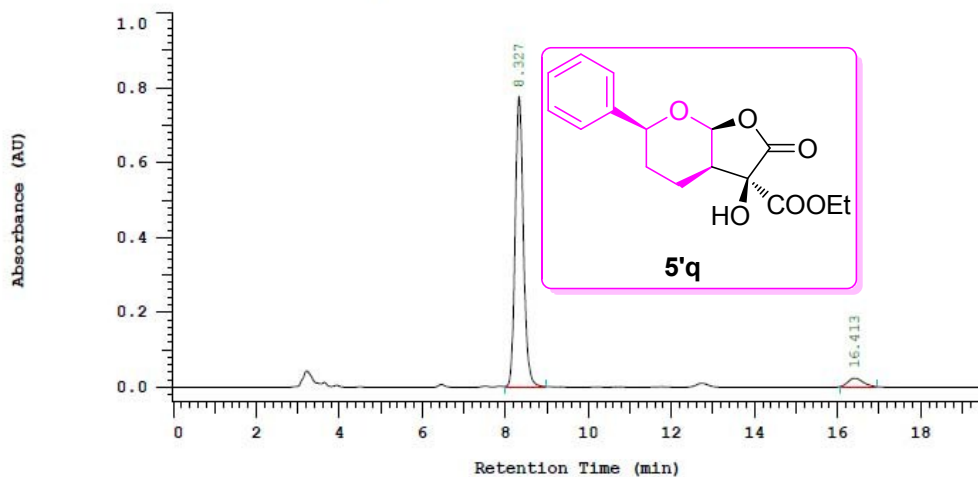

Chrom Type: Fixed WL Chromatogram, 210 nm

Peak Quantitation: AREA  
Calculation Method: AREA%

| No. | RT     | Area    | Area %  | BC |
|-----|--------|---------|---------|----|
| 1   | 8.327  | 5326867 | 94.997  | BB |
| 2   | 16.413 | 280518  | 5.003   | BB |
|     |        | 5607385 | 100.000 |    |

PROTON\_01  
LJY-Me-Bu

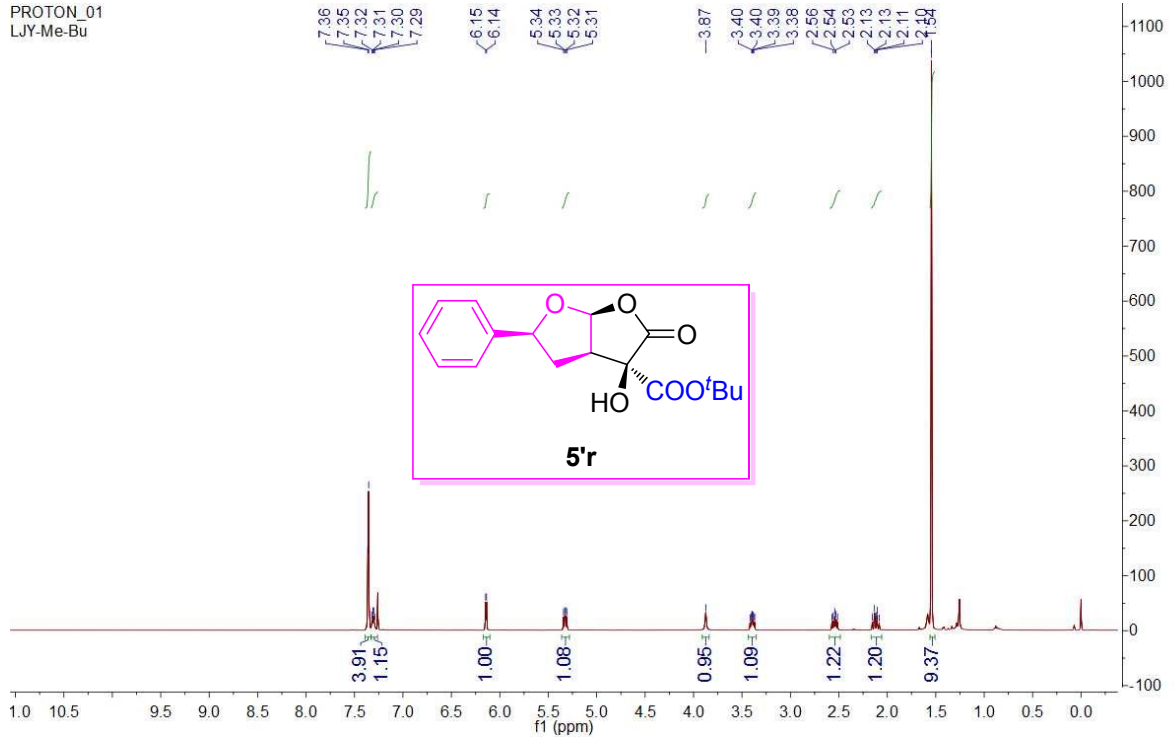

CARBON\_01  
LJY-Me-Bu

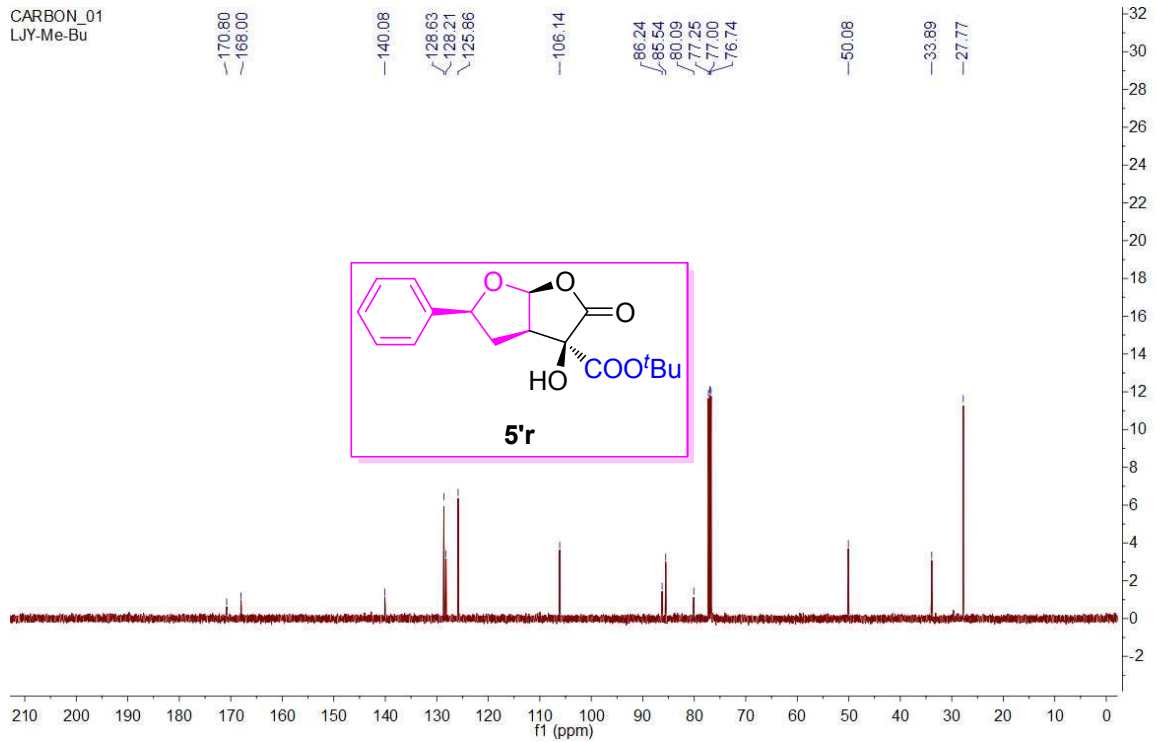

Chrom Type: Fixed WL Chromatogram, 231 nm

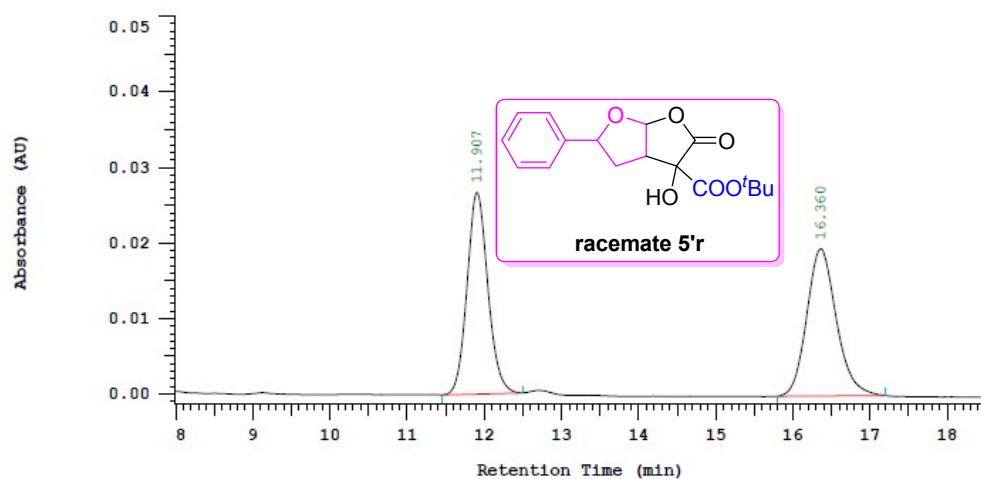

Chrom Type: Fixed WL Chromatogram, 231 nm

Peak Quantitation: AREA  
Calculation Method: AREA%

| No. | RT     | Area   | Area %  | BC |
|-----|--------|--------|---------|----|
| 1   | 11.907 | 249943 | 49.096  | BB |
| 2   | 16.360 | 259144 | 50.904  | BB |
|     |        | 509087 | 100.000 |    |

Chrom Type: Fixed WL Chromatogram, 231 nm

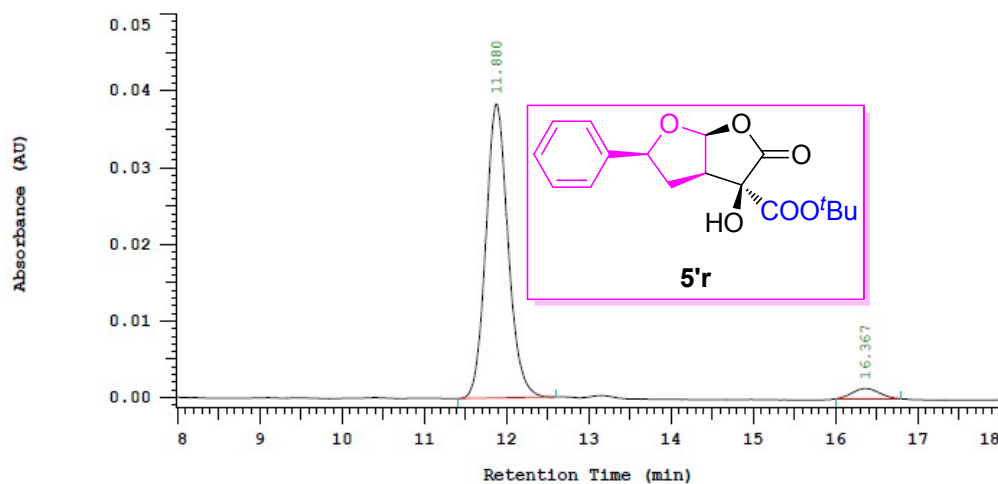

Chrom Type: Fixed WL Chromatogram, 231 nm

Peak Quantitation: AREA  
Calculation Method: AREA%

| No. | RT     | Area   | Area %  | BC |
|-----|--------|--------|---------|----|
| 1   | 11.880 | 360490 | 95.824  | BB |
| 2   | 16.367 | 15710  | 4.176   | BB |
|     |        | 376200 | 100.000 |    |

PROTON\_01  
LJY-Si

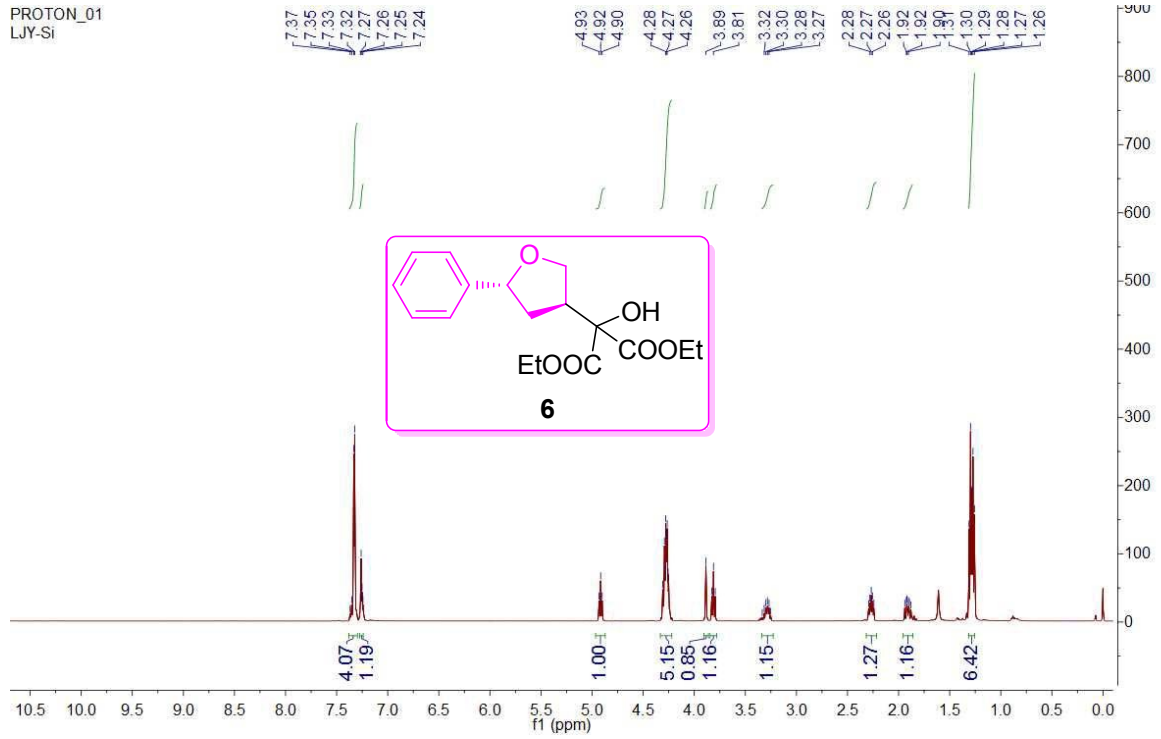

CARBON\_01  
LJY-Si

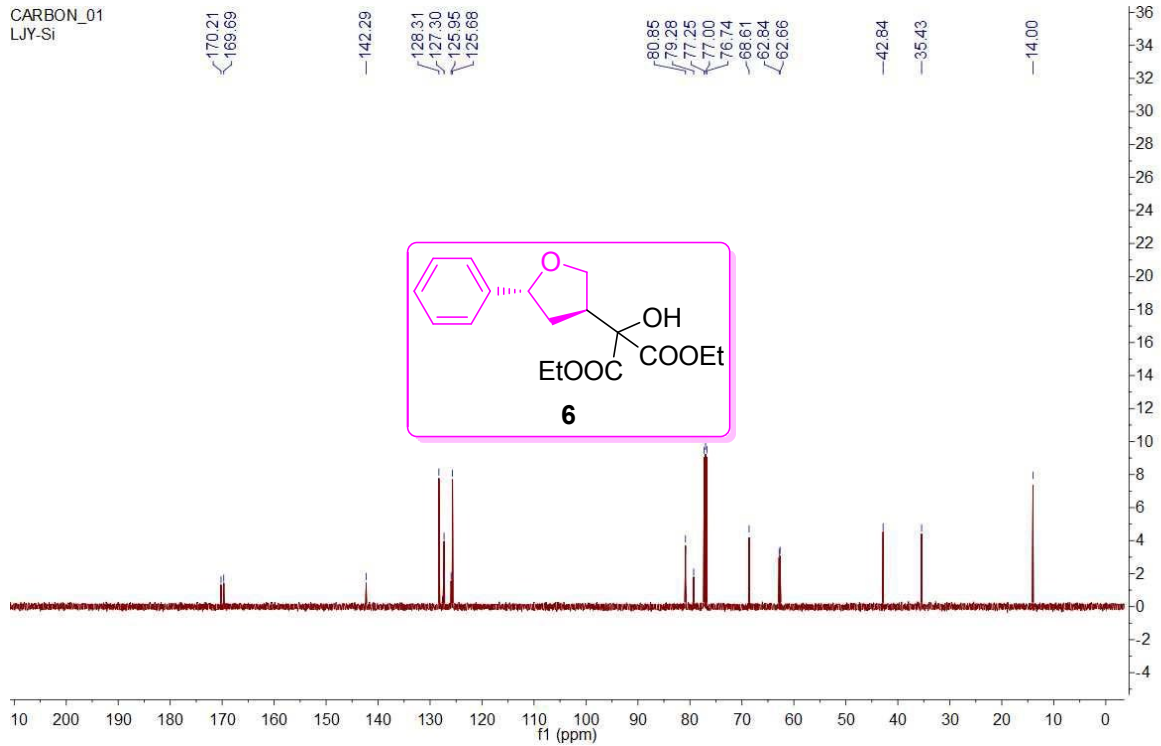

PROTON\_01  
LJY-PCC-1

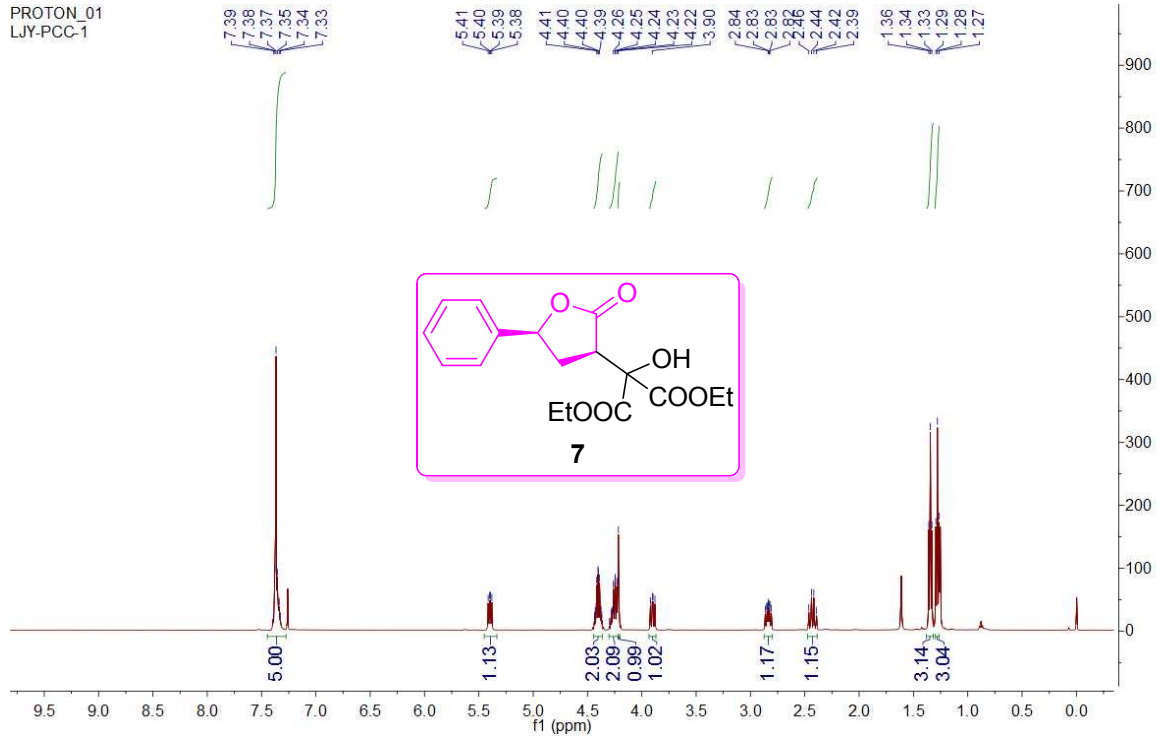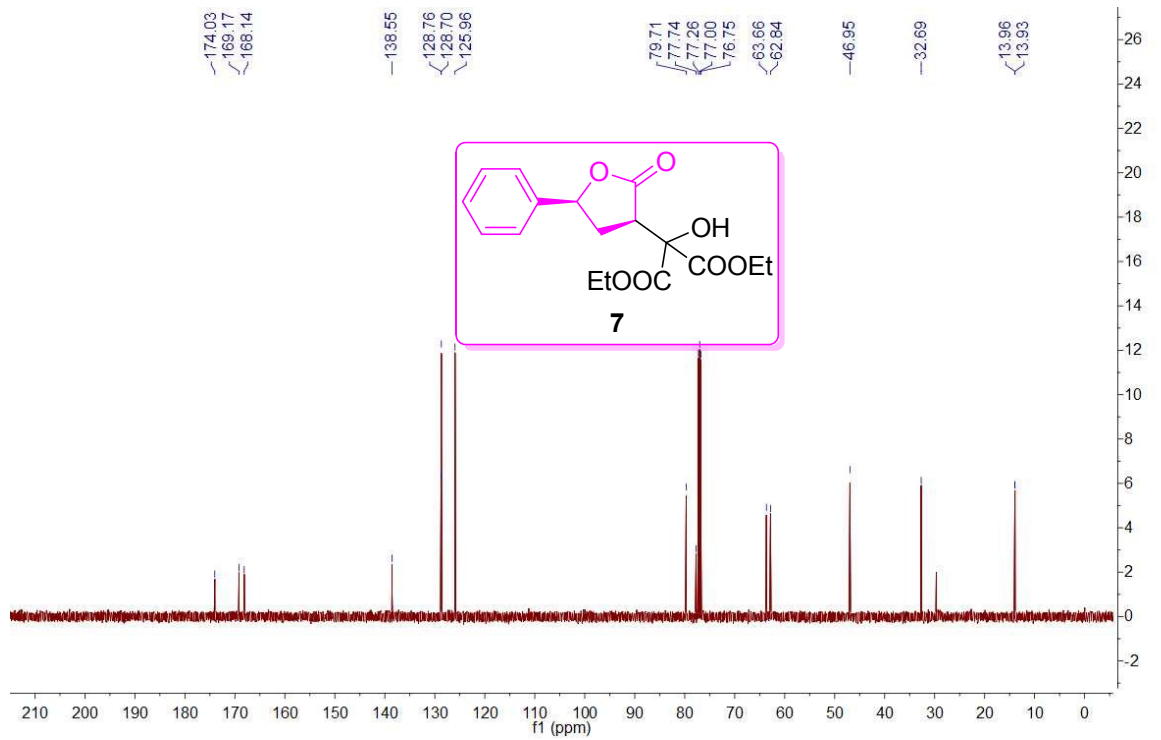

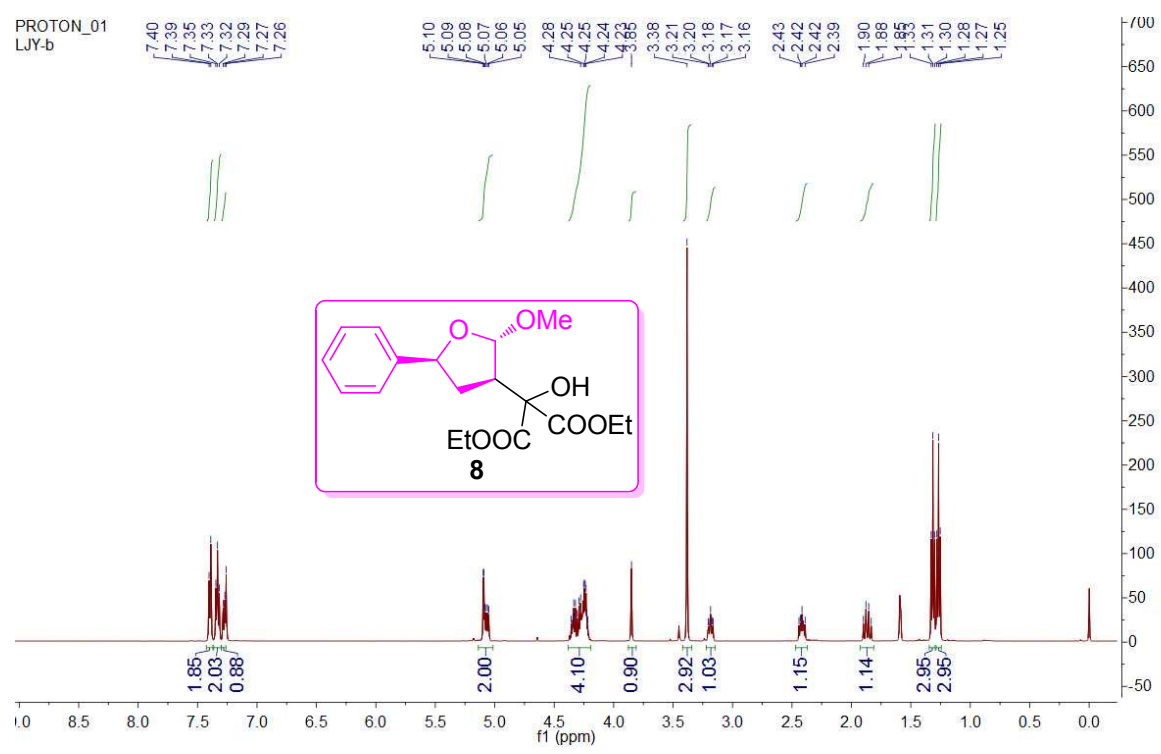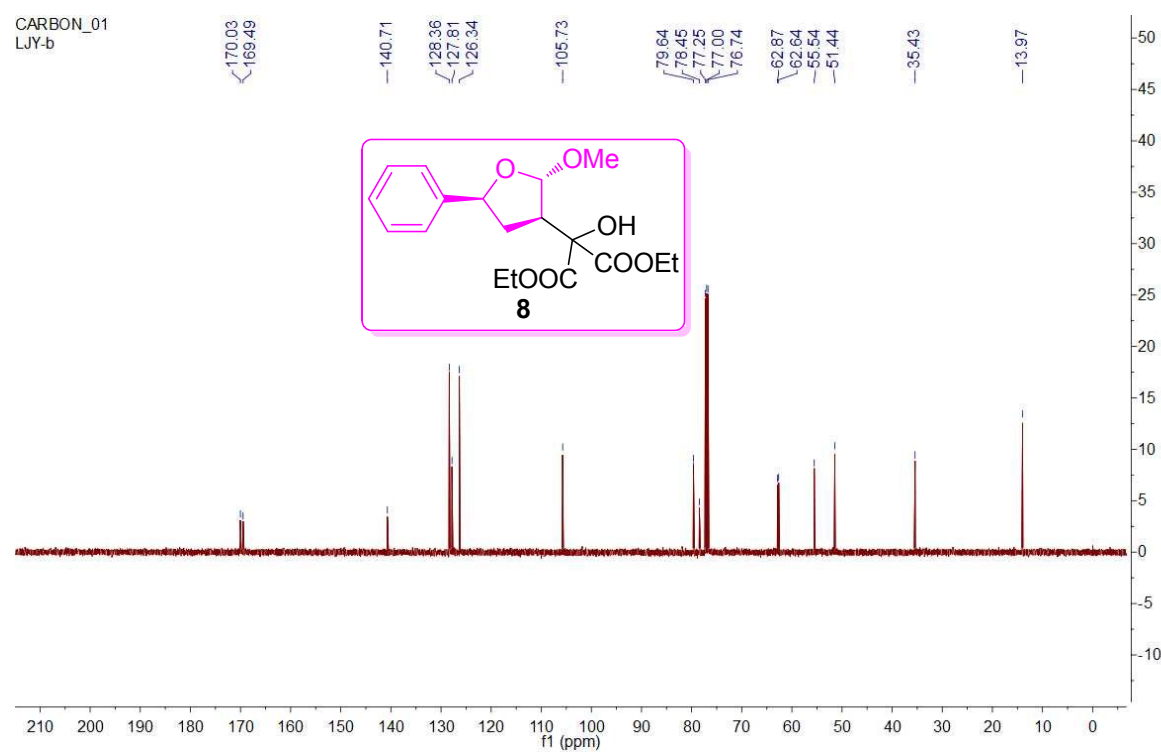

## The determination of the absolute configuration of compound 8 by NOE

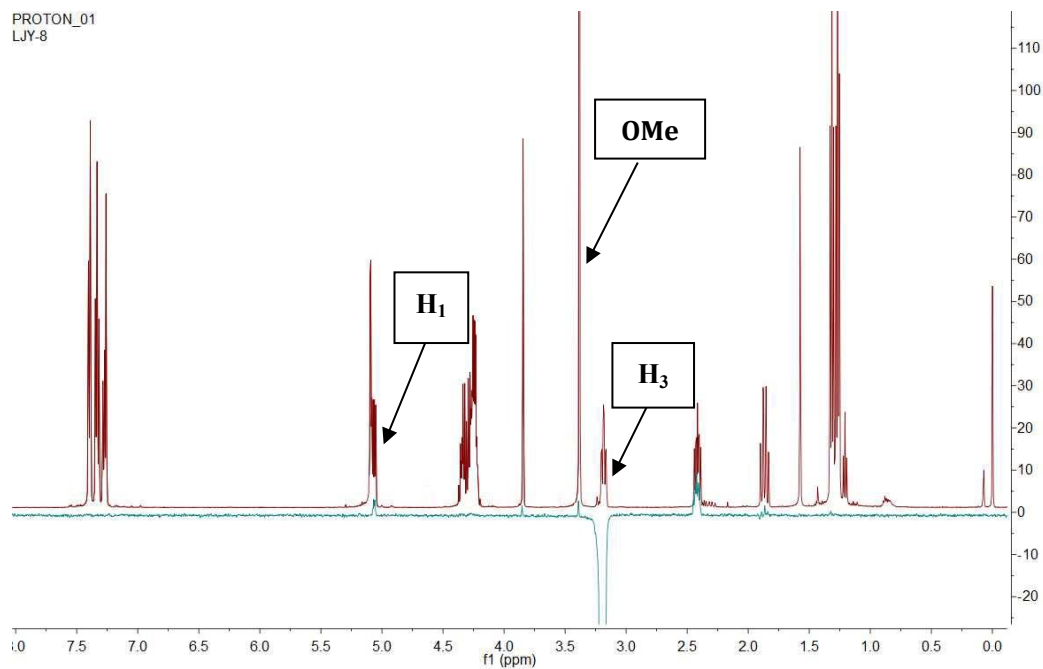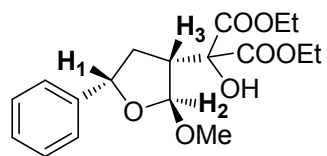

8



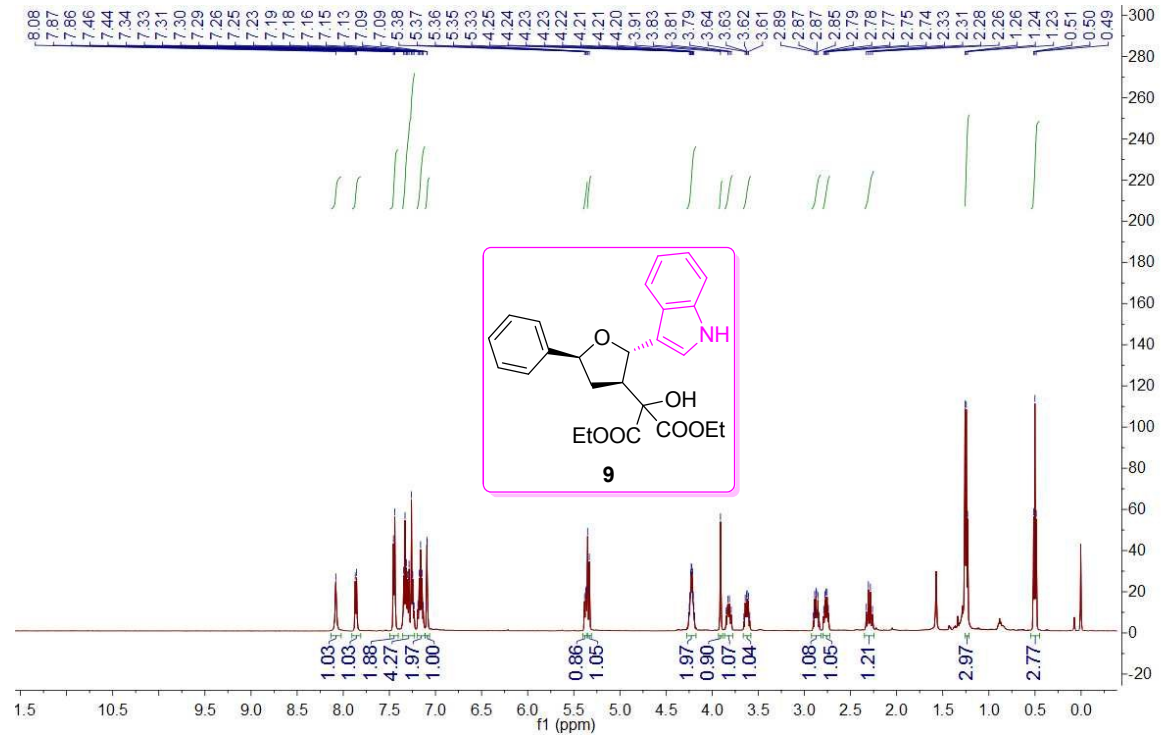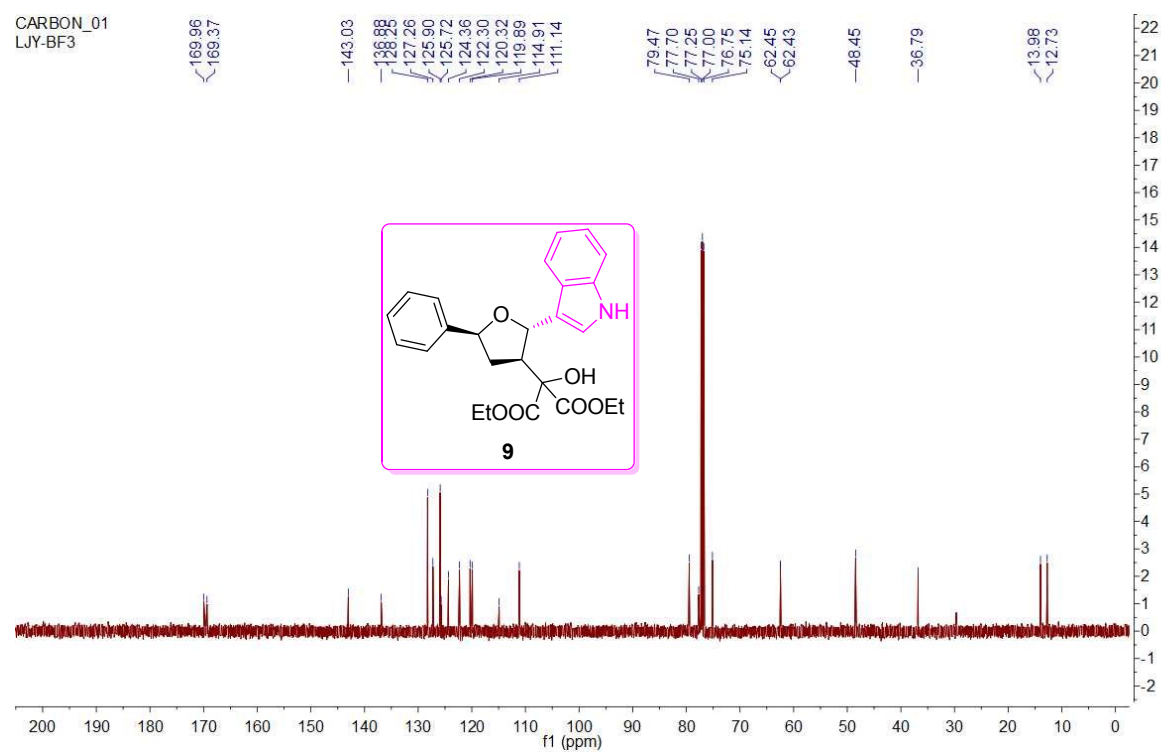

Supplement: c6ob02420c1.pdf [file c6ob02420c1.pdf]
